# Supplementary material for: The China Patient-Centred Evaluative Assessment of Cardiac Events (China PEACE)-Prospective Study of 3-Vessel Disease: rationale and design
Source: HighWire-hosted journal article supplement (doi:10.1136/bmjopen-2015-009743), 2016-02-01

## **SUPPLEMENTAL MATERIAL**

The China Patient-Centered Evaluative Assessment of Cardiac Events (China PEACE) -  
Prospective Study of 3-Vessel Disease: Rationale and Design

### **Table of Contents**

|           |                                                                                                            |
|-----------|------------------------------------------------------------------------------------------------------------|
| Page 3:   | Study Protocol                                                                                             |
| Page 19:  | List of Guideline Recommendations and Scenarios of Appropriate Use Criteria<br>Assessed in China PEACE-3VD |
| Page 24:  | Case Report Form                                                                                           |
| Page 73:  | Quality Assurance and Quality Control Strategies in Medical Record Abstraction                             |
| Page 75:  | Baseline and Follow-up Questionnaires                                                                      |
| Page 130: | Sample Size Calculation                                                                                    |

# Study Protocol

**Title:** The China Patient-Centered Evaluative Assessment of Cardiac Events (China PEACE) - Prospective Study of 3-Vessel Disease

## **Design:**

multi-center, prospective, observational study

## **Inclusion Criteria:**

- patients diagnosed with coronary artery disease with significant stenosis ( $\geq 50\%$  diameter) in 3 major coronary arteries based on the interventional cardiologist's interpretation on elective coronary angiography
- patients diagnosed with significant stenosis ( $\geq 50\%$  diameter) in the left main coronary artery based on the interventional cardiologist's interpretation on elective coronary angiography

## **Exclusion Criteria:**

- history of prior revascularization
- an acute myocardial infarction within 24 hours prior to the current procedure
- those who had been previously enrolled in China PEACE-3VD study

## **Exclusion Criteria for Prospective Cohort:**

- patients who were critically ill in the Intensive Care Unit
- unable to understand the study questions due to cognitive function or language barriers
- had been discharged after it was discovered that they were eligible

## **Enrollment Period**

December 2012 to December 2013

## **Estimated Sample Size of the Entire Cohort (both Enrolled and Not Enrolled)**

4000

## The Need for This Study

With an aging population and an increasing prevalence of cardiovascular risk factors[1, 2], China is experiencing a rapid rise in coronary artery disease (CAD)[1, 3-5]. Further, the prevalence of the most complex and morbid diseases, three-vessel disease (3VD) and left main (LM) disease, together referred to as “complex coronary artery disease” (CCAD), is growing concomitantly[6-9]. The major treatment strategies for CCAD, coronary revascularization via coronary artery bypass grafting (CABG) or percutaneous coronary intervention (PCI), have substantially increased in China. In 2013, nearly 30,000 CABG and 390,000 PCI procedures were performed[10, 11], and the volumes of CABG and PCI continue to increase annually at the rates of about 8% and 15%, respectively[10-12]. Though the introduction of drug-eluting stents has decreased restenosis rates of PCI[13], recent randomized controlled trials have failed to show the advantage of PCI over CABG for CCAD specifically[8, 14]. Multiple recent guidelines designate CABG in combination with optimal medical therapy (OMT) as the standard of care for CCAD[7, 15-17].

Studies of real-world practice in western countries have identified patterns of inappropriate revascularization use among CCAD patients, especially use of PCI[18-22]. In China, the PCI/CABG ratio is 13:1, much higher than the PCI/CABG ratio of 3:1 in many other countries[23]. This high ratio may partly be due to the limited number of cardiac surgery facilities and surgeons as compared with the number of hospitals and cardiologists with the capability to perform PCI. There are approximately 700 hospitals with the ability to perform cardiac surgery, while over 1000 hospitals with the capability to perform PCI in China[11, 24]. Also, patients themselves may be choosing PCI over CABG given the upfront expense necessary in China's health care system which demands for as much as \$15,000 prior to CABG, as well as perceptions about the anticipated pain and suffering resulting from an open procedure[25]. However, given the inadequate quality measurements and incentives to follow clinical guidelines for procedures in China[26], as well a disproportional increase of PCI versus CABG among the majority of regions and hospitals[10, 27, 28], the high ratio of PCI to CABG has raised critical concerns about the selection of the type of revascularization procedures for patients with CCAD.

Chinese version percutaneous coronary intervention guidelines were published in 2012[29]. Foreign guidelines are also widely accepted in China[15, 16]. However, gaps in knowledge remain with regards to adherence of physicians to current guidelines and appropriate use criteria of the chosen treatment. Thoroughly evaluating this information, as well as

understanding the variation among regions and hospitals in China, is critical to developing evidence-based and effective quality improvement initiatives for the decision-making process and quality of care for CCAD in Chinese population[30]. Further, little is known about variations in treatment decisions, key predictors of outcomes in order to benchmark levels of achievable outcomes, nor adverse events or patient-reported outcomes for patients with CCAD in China. One study, based on the China Cardiovascular Surgery Registry data, identified generally low mortality and complication rates after CABG but these rates varied substantially by hospital and region[28]. Moreover, one single center retrospective observational study demonstrated lower rates of adverse events of CABG as compared with PCI using drug-eluting stents for multi-vessel disease[31]. However, there are no prospective studies evaluating the selection of the type of treatment (CABG, PCI and optimal medical therapy) for patients with CCAD in cardiac centers with capability of performing both CABG and PCI. The investigators know little about outcomes after these two treatments, including patient reported outcomes measures (PROM).

**Objectives:**

The major objectives are to

- describe the treatment choice for each patient with CCAD in large cardiac care centers in China
- assess the alignment of treatment with the guidelines and appropriate use criteria, and evaluate the variation of treatment appropriateness among hospitals
- evaluate the relationship between appropriateness of treatment choices and patient outcomes including PROMs over 1 year

Secondary objectives are to

- provide insights into key predictors of treatment strategy choices, in-hospital and 1-year outcome for CCAD by evaluating the associations of demographic, clinical risk factors, coronary anatomy complexity (SYNTAX score), psychosocial, and socioeconomic factors with patient outcomes
- assess the applicability of previously developed risk evaluation models (including the logistic EuroSCORE, SinoSCORE and SYNTAX Scores) for both PCI and CABG in the Chinese population

- partner with the Chinese government, Chinese Medical Associations and other national and international organizations to disseminate findings from the China PEACE-3VD study to improve the care and outcomes for patients with CCAD
- benchmark levels of achievable outcomes to leverage quality improvement initiatives throughout the country

## Organizations:

China PEACE is a collaborative effort among the China National Center for Cardiovascular Diseases (NCCD), the Yale-New Haven Hospital Center for Outcomes Research and Evaluation, the Chinese government, and a national network of Chinese hospitals (Figure 1). The goal of this network is to generate new knowledge relevant to practice and policy and to translate this knowledge into action to improve care and outcomes for patients with cardiovascular disease.

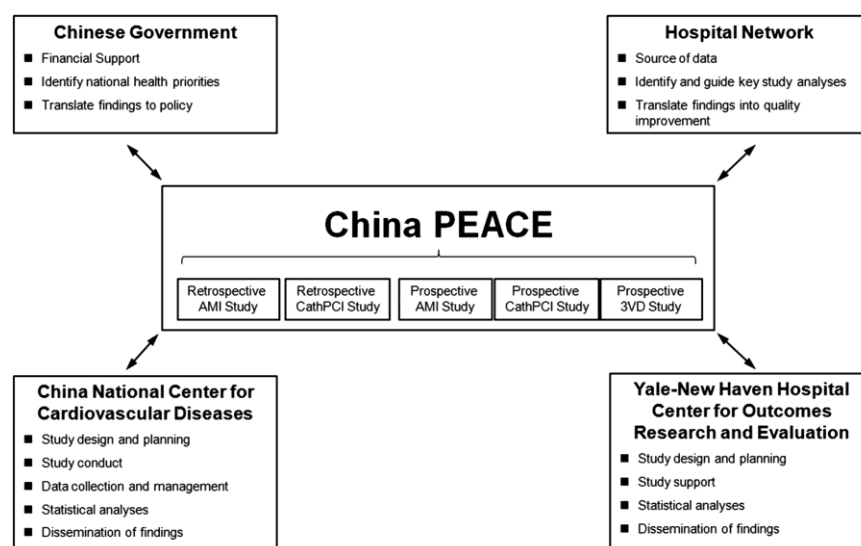

Figure 1 The China Patient-Centered Evaluative Assessment of Cardiac Events (PEACE) initiative.

## Study Design:

China PEACE-3VD plans to consecutively enroll patients with the diagnosis of CCAD by elective (scheduled 24 hours prior) coronary artery angiography without previous history of CABG or PCI from a broad network of 24 hospitals over a 1-year enrollment period. The investigators will enroll patients after an elective coronary angiogram revealed three-vessel disease and/or left-main coronary artery disease. Trained coordinators at each site will interview patients during their index hospitalization, as well as at 1-month, 6-month and 12-month intervals following hospital discharge (Figure 2). The core lab based at Fuwai Hospital will

review and calculate all SYNTAX Scores of each patient's index coronary angiography. Medical records will be scanned at each participating site and then transferred to coordinating center. The "Real Data Medical Research Inc." group, under the supervision of the coordinating center, will centrally abstract data from each medical record.

The Ethics Committee of Fuwai Hospital has approved the study design and audits the study conduction yearly. Every participating patient are required to sign an informed consent.

Additionally, patients who are not enrolled in the prospective cohort will be added to a registry cohort, with only their medical record data and SYNTAX Scores collected. This separate registry study has also been reviewed and approved by the Ethics committee at Fuwai Hospital.

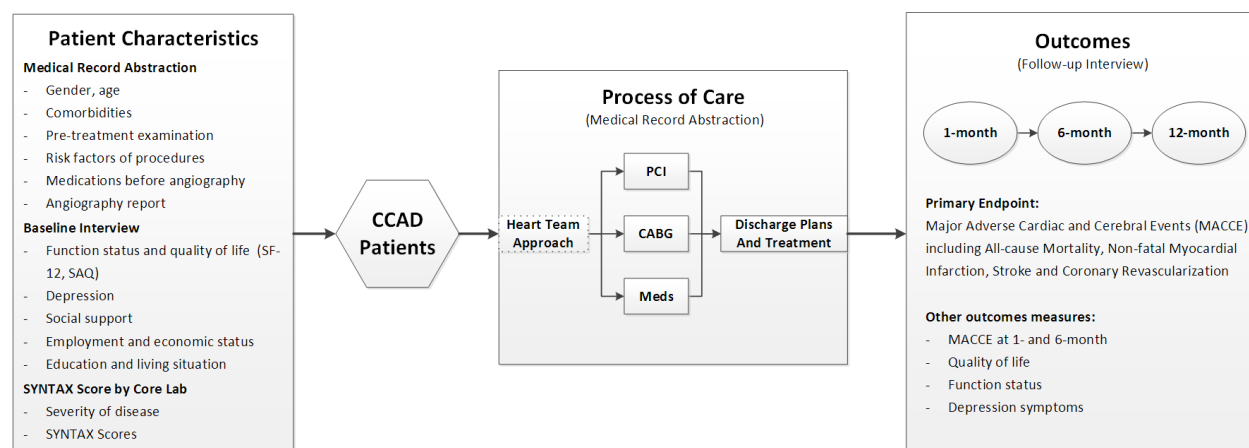

Figure 2 Design and Study Overview of China PEACE-3VD

## Pilot Study

In order to optimize the processes of the China PEACE-3VD Study, a pilot study at Fuwai Hospital, one of the leading cardiovascular hospitals in China, has been conducted. From July 2011 through September 2012, the investigators enrolled over 1500 patients in the pilot study.

## Population

From December 2012 to December 2013, the cardiac catheterization physicians at each local hospital routinely will review all elective coronary angiograms (scheduled 24 hours before the procedure) within two days of the procedure, to identify patients diagnosed with coronary artery disease with significant stenosis ( $\geq 50\%$  diameter) in 3 major coronary arteries or significant stenosis ( $\geq 50\%$  diameter) in the left main coronary artery based on the interventional cardiologist's interpretation. Exclusion criteria are as follows: history of prior revascularization,

an acute MI within 24 hours prior to the current procedure, or those who has been previously enrolled in China PEACE-3VD study. Once the patients are identified to be eligible, the investigators will assign him/her a unique study ID. Because an important component of the study is to perform a detailed, in-person, patient interview, patients needed to be prospectively identified as early as possible during their hospitalization.

If possible, the investigators will invite all eligible patients during his or her hospitalization to sign the informed consent and enroll. However, the investigators will not invite patients who are critically ill in the Intensive Care Unit, or unable to understand the study questions due to cognitive function or language barriers, or has been discharged after it is discovered that they are eligible. The investigators enroll consenting patients into the prospective cohort, and then the investigators register all other patients into the registry cohort. This cohort will be used to assess the representativeness of the study and will also be used to assess the entire treatment choices.

### **Participating Sites**

A research network has been established in collaboration with 24 tertiary hospitals located in 17 provinces throughout China (Figure 2). The investigators select each hospital based on the following considerations: its capability of performing both PCI and CABG; its position as a top 3 highest volume hospital for CABG and PCI in the located province or direct-controlled municipality; the study team's prior experience with participating in a clinical study; overall representation of geographic locations across the country; and the feasibility of conducting the study at the given site. All hospitals contacted agree to participate.

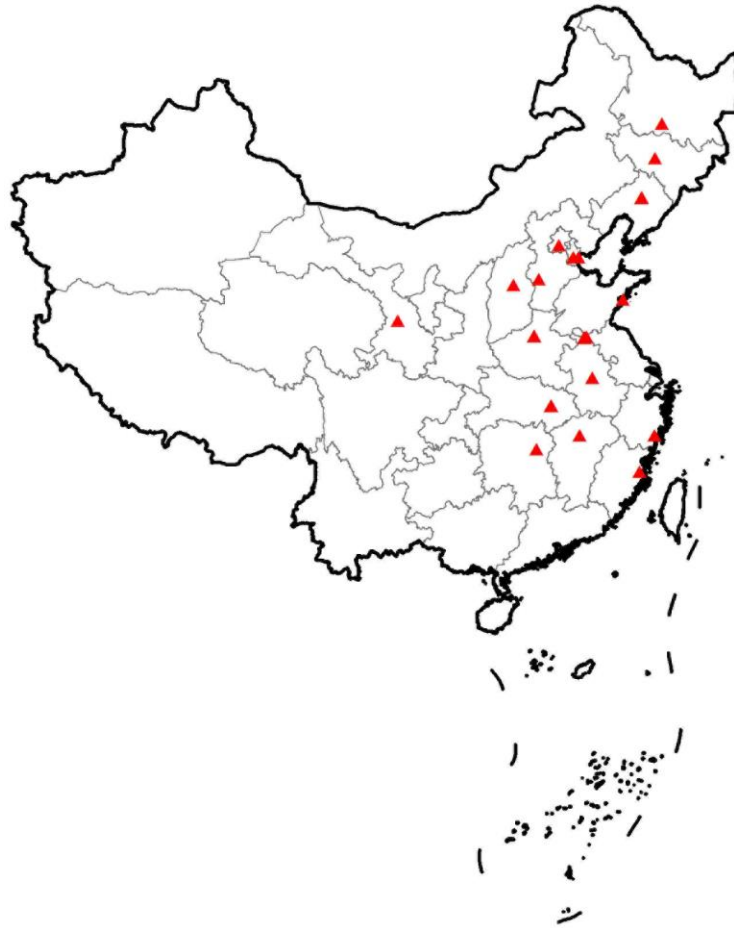

Figure 3 Geographic distribution of China PEACE-3VD Participating Centers

Participating sites:

- Anhui Provincial Hospital
- First Hospital of Jilin University
- Fuwai Hospital, Chinese Academy of Medical Sciences
- General Hospital of Shenyang Military Region
- Jiangxi Provincial People's Hospital
- Qingdao Fuwai Hospital
- Shanxi Cardiovascular Hospital
- Teda International Cardiovascular Hospital
- The 2st Affiliated Hospital of Harbin Medical University
- The Affiliated Hospital of Xuzhou Medical College
- The First Affiliated Hospital of Fujian Medical University
- The First Affiliated Hospital of Wenzhou Medical University



- The First Affiliated Hospital of Zhengzhou University
- The First Hospital of Lanzhou University
- The First People's Hospital of Xuzhou
- The People's Hospital of Liaoning Province
- The Second Affiliated Hospital of Zhengzhou University
- The Second Hospital of Hebei Medical University
- The Second Xiangya Hospital of Central South University
- Tianjin Chest Hospital
- Tongji Hospital, Tongji Medical College of Huazhong University of Science & Technology
- Union Hospital, Tongji Medical College of Huazhong University of Science & Technology
- Wuhan Asia Heart Hospital

#### **Detailed Protocol**

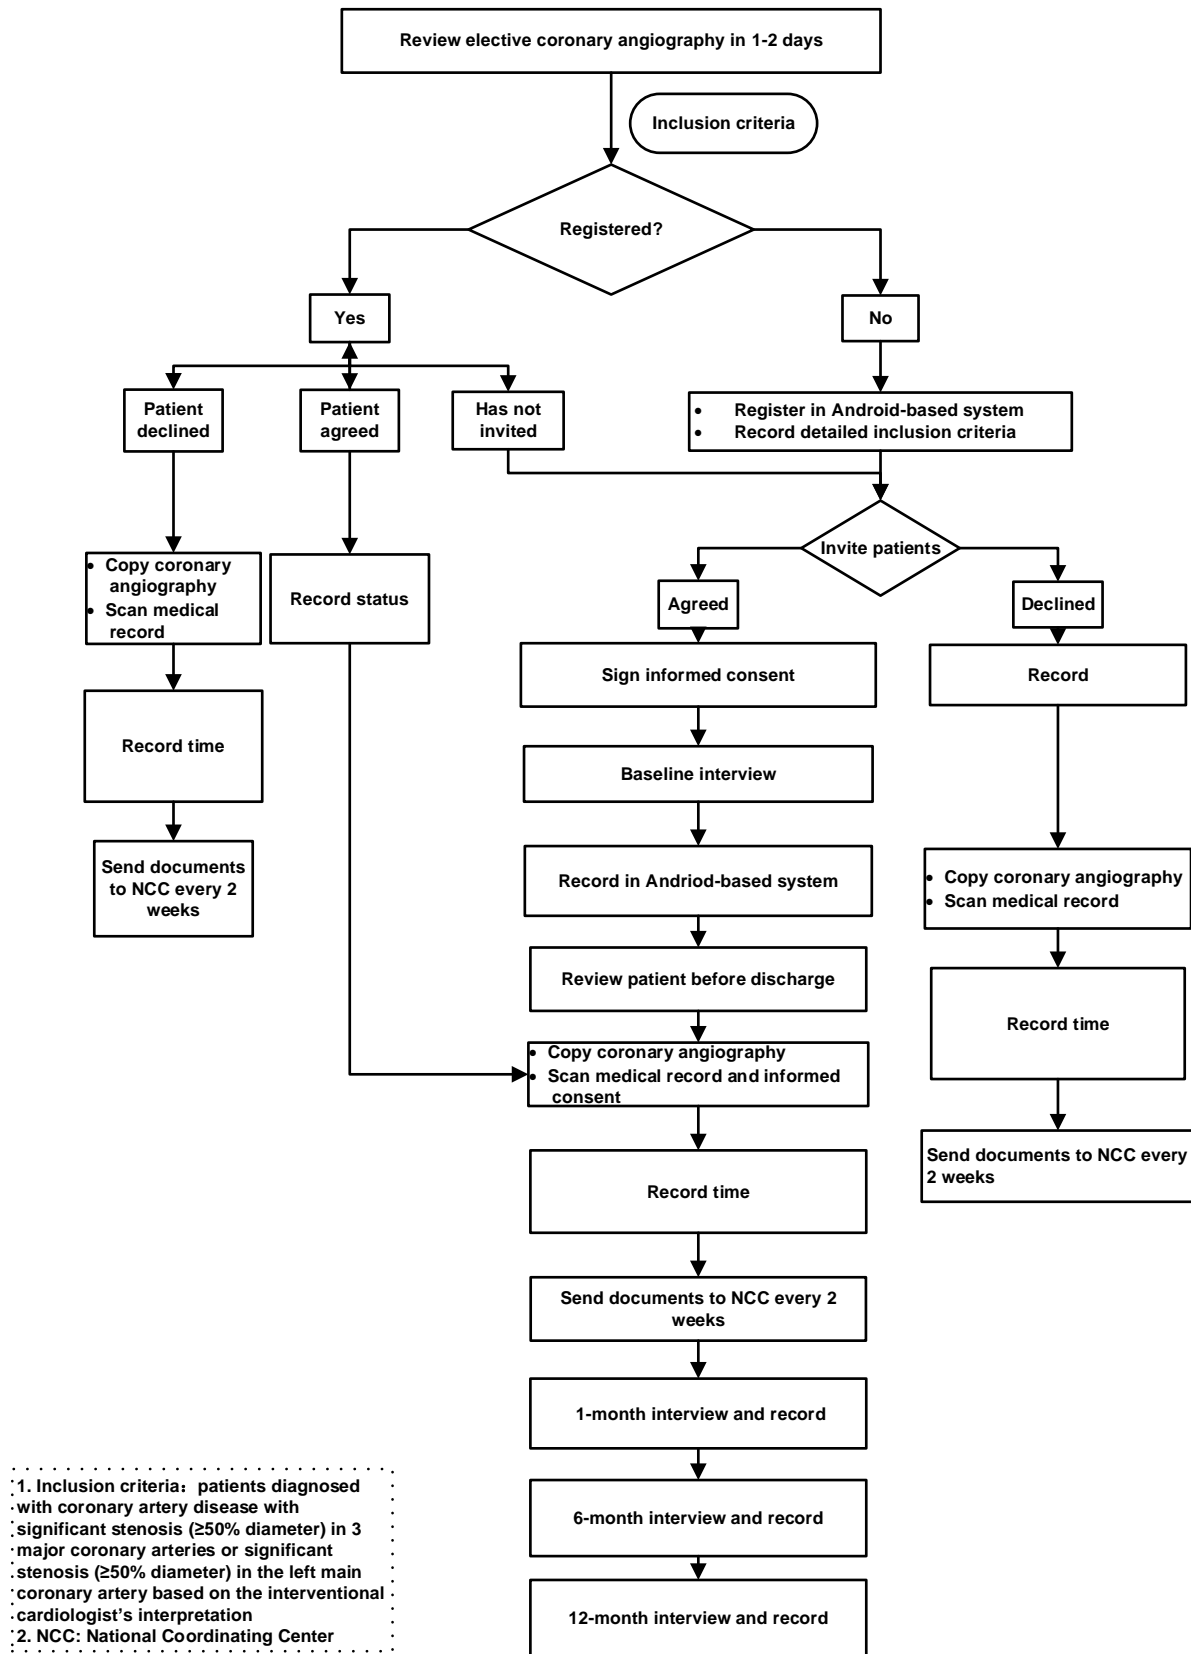

Figure 4 Detailed Protocol for China PEACE-3VD Study

## Data Elements

The investigators has examined both the English and Chinese language literature for relevant studies to create a candidate list of potential data elements (Table 1). Whenever possible, 2013 American College of Cardiology/American Heart Association (ACC/AHA) “Clinical Data Elements and Definitions for Measuring the Clinical Management and Outcomes of Patients With Acute Coronary Syndromes and Coronary Artery Disease” will be used to define clinical characteristics of patients’ presentation, comorbidities, and clinical risk factors[32]. Procedural characteristics will be obtained using definitions from the AHA/ACCF Clinical Data Elements and Definitions and the Society of Thoracic Surgeons Adult Cardiac Surgery Database[32, 33]. Additionally, the investigators will include elements specific to the Chinese context of this study, such as the use of traditional Chinese medicine. As per prior studies, measures will be selected from the existing literature whenever possible so that valid and reproducible estimates of each concept could be acquired [34, 35].

Table 1 Data Elements

| Variables                       | Medical Record | SYNTAX Score | Baseline | Follow-up Interviews |         |          |
|---------------------------------|----------------|--------------|----------|----------------------|---------|----------|
|                                 |                |              |          | 1-month              | 6-month | 12-month |
| <b>Clinical Characteristics</b> |                |              |          |                      |         |          |
| Medical history                 | √              |              |          |                      |         |          |
| CAD family history              |                |              | √        |                      |         | √        |
| Lab testing                     | √              |              |          |                      |         |          |
| Physical testing                | √              |              |          |                      |         |          |
| Image examination               | √              |              |          |                      |         |          |
| SYNTAX Score                    |                | √            |          |                      |         |          |
| <b>Treatment</b>                |                |              |          |                      |         |          |
| Progress note                   | √              |              |          |                      |         |          |
| Drug treatment                  | √              |              |          |                      |         |          |
| Procedures                      | √              |              |          |                      |         |          |
| Secondary prevention            | √              |              |          |                      |         |          |
| Secondary prevention compliance |                |              |          | √                    | √       | √        |
| <b>Patient Characteristics</b>  |                |              |          |                      |         |          |
| Basic information               |                |              | √        |                      |         |          |
| Contact                         |                |              | √        | √                    | √       | √        |
| BMI/Weight/Waistline            |                |              | √        | √                    | √       | √        |
| Socioeconomic status            |                |              | √        |                      |         | √        |
| <b>Outcomes</b>                 |                |              |          |                      |         |          |
| Death                           |                |              |          | √                    | √       | √        |
| MACCE                           |                |              |          | √                    | √       | √        |

| Variables         | Medical Record | SYNTAX Score | Baseline | Follow-up Interviews |         |          |
|-------------------|----------------|--------------|----------|----------------------|---------|----------|
|                   |                |              |          | 1-month              | 6-month | 12-month |
| Rehospitalization |                |              |          | √                    | √       | √        |
| EQ-5D             |                |              | √        |                      |         |          |
| SAQ               |                |              | √        | √                    | √       | √        |
| Blood pressure    | √              |              |          | √                    | √       | √        |
| Blood glucose     | √              |              |          |                      | √       | √        |
| Blood lipid       | √              |              |          |                      | √       | √        |
| Hepatic function  | √              |              |          |                      | √       | √        |
| Renal function    | √              |              |          |                      | √       | √        |

## OUTCOME MEASURES

China PEACE-3VD seeks to evaluate a broad range of outcomes.

Primary outcome measure:

MACCE (major adverse cardiac and cerebrovascular events, the composite end-point of all-cause mortality, non-fatal myocardial infarction, stroke and additional coronary revascularization) at one year.

Major secondary endpoints:

PROMs at one year. The study will use the EQ-5D instrument as a measure of generic health related quality of life[36, 37], which also enables the estimation of utilities, and the Seattle Angina Questionnaire (SAQ) to assess condition-specific functioning and quality of life[38, 39]. Psychosocial status will be assessed for depressive symptoms (8-item Patient Health Questionnaire: PHQ-8)[40].

## MEDICAL RECORD ABSTRACTION

Coordinators from each local site will be required to scan all medical charts of patients in either the prospective or registry cohorts, then transmit the scanned copy to the coordinating center through the mail on encrypted, password-protected flash drives to the coordinating center. The medical records will be evaluated for completeness and deidentified through covering all personal information in the medical charts. The medical charts will include the patients' cardiac and non-cardiac history, non-invasive testing (both the reports and the recorded electrocardiograms), laboratory results, in-hospital medications and procedures, in-hospital complications, discharge medications, and discharge disposition. This information will be abstracted by a group of trained abstractors under the supervision of trained quality control

personnel, cardiologists and cardiac surgeons. The China PEACE-3VD Study will adhere to rigorous standards for medical record transmission and data abstraction, similar to the previously published China PEACE-Retrospective Acute Myocardial Infarction Study and the Percutaneous Coronary Intervention Study[41, 42].

The investigators require a 2-week training course for all chart reviewers, prior to initiation of chart review. This training will include an introduction to the study, detailed information about the presentation of and treatment strategies for coronary artery disease, component parts of the medical record, and the China PEACE-3VD Study data elements and data dictionary.

The investigators will use several strategies to ensure the accuracy of data abstraction. The investigators will build an encrypted web-based data submission system. Further, the medical records will be randomly assigned to abstractors, to avoid potential residual disparities in quality among abstractors. A physician will be always available to answer questions. If the records are not abstracted with 98% accuracy, all medical records in the audited batch will be considered incorrect and re-abstracted by another abstractor. A qualified physician then will review a randomly selected 100 medical records, that have already been reviewed by quality control personnel, to further adjudicate the accuracy of data.

### **SYNTAX Score calculation**

The participating hospitals will send all index catheterization angiography discs of patients in either the prospective cohort or registry cohort to the coordinating center through a safe transport system. Two specialty-trained cardiologists will independently review each angiogram. The Core Lab will calculate the SYNTAX Scores. The range of SYNTAX Scores will be designed to be from 1 to 50. In our study, if the difference between the 2 reviewed SYNTAX Scores is larger than 5, a third physician will review the angiogram and resolve disputes. Additionally, the Core Lab analyze both the data on each lesion, as well as the total score for each patient. The Core Lab will record the degree of every stenosis for inclusion criteria adjudication.

### **Participant interviews**

The investigators will interview participants during the index hospitalization and at 1-month, 6-month and 12-month intervals. Follow-up interviews will be conducted face to face whenever possible. However, if the patient is unable or unwilling to return to the coordinating hospital, telephone interviews will be conducted.

Central project managers of the China PEACE-3VD Study will provide a one-hour standardized training to all interviewers, which includes training on interview skills and describes the significance of each question, during the initial meeting of China PEACE-3VD. To ensure coordinators' understanding of inclusion and exclusion criteria and study processes, two project managers will conduct on-site monitoring within 2 months of the initial meeting at all sites. Further, project managers will conduct on-site observations of baseline interviews. The second on-site monitoring visit will be conducted 6 months after the initiation of the study. At this visit, the project managers will observe follow-up interviews. Additionally, the investigators audio-record every interview for further adjudication and quality control. All interviews will be automatically recorded and transmitted to the coordinating center. The investigators will randomly select 10% of these records for review by project managers to ensure adherence to study protocol.

### **Data management**

The investigators will treat all data as protected health information and store it securely in an encrypted and password-protected database at the coordinating center. The investigators will securely store paper charts in a locked room.

The investigators will develop data management procedures using tablet and web-based technology to ensure accurate and efficient data collection and analysis, confidentiality, and real-time, on-demand study monitoring reports. The collection, shipping, and receipt of data carriers will be tracked by the coordinating center. The investigators will conduct on-site monitoring of appropriate data management at each participating site two times over the study period.

### **Statistical analysis**

The investigators' strategy of data collection permits a broad range of analysis and analytic approaches, based upon the research questions. The investigators will report summary statistics for patient demographic, clinical, psychosocial, and behavioral characteristics; use of diagnostic tests; treatments received; and control of risk factors. The investigators will calculate summary statistics for MACCE, as well as PROMs within 1, 6, and 12 months after enrollment. To help identify risk factors associated with the primary outcomes, the investigators will use standard parametric and non-parametric tests for bivariate analyses, including t test, chi-square test, Fisher's exact test, and Wilcoxon rank sum tests. In addition, appropriate multivariable

regression analyses, such as linear, logistic, Cox proportional hazard, and Poisson models, will be conducted to determine a factor's association with the outcome measures while adjusting for potential confounders. As patients will be clustered within hospitals and different measurement points of outcomes are clustered within patients, our analyses will account for clustering in data (e.g. generalized estimating equations or random effects models). While all efforts will be made to obtain high response rates to follow-up PROMs, some missing data is expected. The investigators will carefully evaluate any potential selection biases introduced by missing data and conduct inverse probability weighting when appropriate, based upon a propensity model for participation in the follow-up assessments, to preferentially weight the experiences of patients who were most like those that did not participate in follow-up. For observational comparative effectiveness studies, propensity score matching and instrumental variable methods will be used when necessary to minimize confounding and selection bias.

### **Funding/Support**

This project is supported by the International Science and Technology Cooperation Program of China [2010DFB33140] and the Key Project in the National Science and Technology Pillar Program during the 12th 5-year plan period [2011BAI11B02, 2011BAI11B21].

## REFERENCES

1. Yang G, Kong L, Zhao W, et al. Emergence of chronic non-communicable diseases in China. *Lancet* 2008;**372**(9650):1697-705.
2. Hu S, Kong L. Report on Cardiovascular Diseases in China (2011). Encyclopedia of China Publishing House 2012.
3. He J, Gu D, Wu X, et al. Major causes of death among men and women in China. *The New England journal of medicine* 2005;**353**(11):1124-34.
4. Moran A, Gu D, Zhao D, et al. Future cardiovascular disease in china: markov model and risk factor scenario projections from the coronary heart disease policy model-china. *Circulation. Cardiovascular quality and outcomes* 2010;**3**(3):243-52.
5. Li J, Li X, Wang Q, et al. ST-segment elevation myocardial infarction in China from 2001 to 2011 (the China PEACE-Retrospective Acute Myocardial Infarction Study): a retrospective analysis of hospital data. *Lancet* 2015;**385**(9966):441-51.
6. D'Ascenzo F, Presutti DG, Picardi E, et al. Prevalence and non-invasive predictors of left main or three-vessel coronary disease: evidence from a collaborative international meta-analysis including 22 740 patients. *Heart* 2012;**98**(12):914-9.
7. Patel MR, Dehmer GJ, Hirshfeld JW, et al. ACCF/SCAI/STS/AATS/AHA/ASNC/HFSA/SCCT 2012 Appropriate use criteria for coronary revascularization focused update: a report of the American College of Cardiology Foundation Appropriate Use Criteria Task Force, Society for Cardiovascular Angiography and Interventions, Society of Thoracic Surgeons, American Association for Thoracic Surgery, American Heart Association, American Society of Nuclear Cardiology, and the Society of Cardiovascular Computed Tomography. *J Am Coll Cardiol* 2012;**59**(9):857-81.
8. Serruys PW, Morice MC, Kappetein AP, et al. Percutaneous coronary intervention versus coronary-artery bypass grafting for severe coronary artery disease. *The New England journal of medicine* 2009;**360**(10):961-72.
9. Hong LF, Li XL, Guo YL, et al. Glycosylated hemoglobin A1c as a marker predicting the severity of coronary artery disease and early outcome in patients with stable angina. *Lipids in health and disease* 2014;**13**:89.
10. Tribune CM. Report on the latest data of China cardiovascular intervention treatment in 2013. <http://www.iiji.com/d-29-198697.html> 2014.
11. Deming Zhu CL, Feilong Hei. White Paper On 2013 China Cardiac Surgery And Extracorporeal Circulation Data. *Chinese Journal of Extracorporeal Circulation* 2014;**2014**(3):129-31.
12. Shengshou Hu, Lingzhi Kong, Runlin Gao, et al. Report On Cardiovascular Diseases In China (2012). Encyclopedia of China Publishing House 2013.
13. Stettler C, Wandel S, Allemann S, et al. Outcomes associated with drug-eluting and bare-metal stents: a collaborative network meta-analysis. *Lancet* 2007;**370**(9591):937-48.
14. Farkouh ME, Domanski M, Sleeper LA, et al. Strategies for multivessel revascularization in patients with diabetes. *The New England journal of medicine* 2012;**367**(25):2375-84.
15. Wijns W, Kolh P, Danchin N, et al. Guidelines on myocardial revascularization. *Eur Heart J* 2010;**31**(20):2501-55.
16. Hillis LD, Smith PK, Anderson JL, et al. 2011 ACCF/AHA Guideline for Coronary Artery Bypass Graft Surgery. A report of the American College of Cardiology Foundation/American Heart Association Task Force on Practice Guidelines. Developed in collaboration with the American Association for Thoracic Surgery, Society of Cardiovascular Anesthesiologists, and Society of Thoracic Surgeons. *J Am Coll Cardiol* 2011;**58**(24):e123-210.



17. Levine GN, Bates ER, Blankenship JC, et al. 2011 ACCF/AHA/SCAI Guideline for Percutaneous Coronary Intervention: executive summary: a report of the American College of Cardiology Foundation/American Heart Association Task Force on Practice Guidelines and the Society for Cardiovascular Angiography and Interventions. *Circulation* 2011;**124**(23):2574-609.
18. Hannan EL, Cozzens K, Samadashvili Z, et al. Appropriateness of coronary revascularization for patients without acute coronary syndromes. *J Am Coll Cardiol* 2012;**59**(21):1870-6.
19. Spertus J, Chan P. The need to improve the appropriate use of coronary revascularization: challenges and opportunities. *J Am Coll Cardiol* 2012;**59**(21):1877-80.
20. SM S, EH C, YS K, et al. - High-density lipoprotein cholesterol as a predictor of clinical outcomes in. *Heart (British Cardiac Society)* 2011;**97**(23):1943-50.
21. Bradley SM, Maynard C, Bryson CL. Appropriateness of percutaneous coronary interventions in Washington State. *Circ Cardiovasc Qual Outcomes* 2012;**5**(4):445-53.
22. Ko DT, Guo H, Wijeyesundera HC, et al. Assessing the association of appropriateness of coronary revascularization and clinical outcomes for patients with stable coronary artery disease. *J Am Coll Cardiol* 2012;**60**(19):1876-84.
23. OECD. *Health at a Glance 2009*: OECD Publishing.
24. Huo Y, Liu Z. Commemorate the 30th anniversary of coronary interventional therapy in China: history and development. *Chinese Journal of Cardiology* 2014;**10**(10).
25. Hu S, Zheng Z, Yuan X, et al. Increasing long-term major vascular events and resource consumption in patients receiving off-pump coronary artery bypass: a single-center prospective observational study. *Circulation* 2010;**121**(16):1800-8.
26. Emanuel E, Emanuel L. What is accountability in health care? *Ann Intern Med* 1996;**124**(2):229-39.
27. Zheng Z, Zhang L, Hu S, et al. Risk factors and in-hospital mortality in Chinese patients undergoing coronary artery bypass grafting: analysis of a large multi-institutional Chinese database. *J Thorac Cardiovasc Surg* 2012;**144**(2):355-9, 59.e1.
28. Hu S, Zheng Z, Yuan X, et al. Coronary artery bypass graft: contemporary heart surgery center performance in China. *Circ Cardiovasc Qual Outcomes* 2012;**5**(2):214-21.
29. Interventional Cardiology Group of Chinese Society of Cardiology EBoCJoC. 2012 China Guideline for Percutaneous Coronary Intervention. *Chinese Journal of Cardiology* 2012;**40**(4):271-7.
30. Harris-Hayes M, McDonough CM, Leunig M, et al. Clinical outcomes assessment in clinical trials to assess treatment of femoroacetabular impingement: use of patient-reported outcome measures. *The Journal of the American Academy of Orthopaedic Surgeons* 2013;**21 Suppl 1**:S39-46.
31. Li Y, Zheng Z, Xu B, et al. Comparison of drug-eluting stents and coronary artery bypass surgery for the treatment of multivessel coronary disease: three-year follow-up results from a single institution. *Circulation* 2009;**119**(15):2040-50.
32. Cannon CP, Brindis RG, Chaitman BR, et al. 2013 ACCF/AHA key data elements and definitions for measuring the clinical management and outcomes of patients with acute coronary syndromes and coronary artery disease: a report of the American College of Cardiology Foundation/American Heart Association Task Force on Clinical Data Standards (Writing Committee to Develop Acute Coronary Syndromes and Coronary Artery Disease Clinical Data Standards). *Circulation* 2013;**127**(9):1052-89.
33. Database TSoTSN. The Society of Thoracic Surgeons Adult Cardiac Surgery Database Data Collection Form. [www.sts.org/sts-national-database/](http://www.sts.org/sts-national-database/) 2014.
34. Arnold SV, Chan PS, Jones PG, et al. Translational Research Investigating Underlying Disparities in Acute Myocardial Infarction Patients' Health Status (TRIUMPH): design

- and rationale of a prospective multicenter registry. *Circ Cardiovasc Qual Outcomes* 2011;**4**(4):467-76.
35. Lichtman JH, Lorenze NP, D'Onofrio G, et al. Variation in recovery: Role of gender on outcomes of young AMI patients (VIRGO) study design. *Circ Cardiovasc Qual Outcomes* 2010;**3**(6):684-93.
  36. EuroQol--a new facility for the measurement of health-related quality of life. *Health Policy* 1990;**16**(3):199-208.
  37. Li M, Luo N. Application of EQ-5D Chinese version. *China Journal of Pharmaceutical Economics* 2009(1):49-57.
  38. Spertus JA, Winder JA, Dewhurst TA, et al. Development and evaluation of the Seattle Angina Questionnaire: a new functional status measure for coronary artery disease. *J Am Coll Cardiol* 1995;**25**(2):333-41.
  39. Li J, Chang G. Assessment of SAQ for measuring quality of life among patients with coronary heart disease. *Chin J Public Health* 2004;**20**(5):594.
  40. Kroenke K, Strine TW, Spitzer RL, et al. The PHQ-8 as a measure of current depression in the general population. *J Affect Disord* 2009;**114**(1-3):163-73.
  41. Dharmarajan K, Li J, Li X, et al. The China Patient-Centered Evaluative Assessment of Cardiac Events (China PEACE) Retrospective Study of Acute Myocardial Infarction: Study Design. *Circ Cardiovasc Qual Outcomes* 2013;**6**(6):732-40.
  42. Li J, Dharmarajan K, Li X, et al. Protocol for the China PEACE (Patient-centered Evaluative Assessment of Cardiac Events) retrospective study of coronary catheterisation and percutaneous coronary intervention. *BMJ open* 2014;**4**(3):e004595.
  43. Fihn SD, Blankenship JC, Alexander KP, et al. 2014 ACC/AHA/AATS/PCNA/SCAI/STS focused update of the guideline for the diagnosis and management of patients with stable ischemic heart disease: a report of the American College of Cardiology/American Heart Association Task Force on Practice Guidelines, and the American Association for Thoracic Surgery, Preventive Cardiovascular Nurses Association, Society for Cardiovascular Angiography and Interventions, and Society of Thoracic Surgeons. *J Thorac Cardiovasc Surg* 2015;**149**(3):e5-23.
  44. Kolh P, Windecker S, Alfonso F, et al. 2014 ESC/EACTS Guidelines on myocardial revascularization: the Task Force on Myocardial Revascularization of the European Society of Cardiology (ESC) and the European Association for Cardio-Thoracic Surgery (EACTS). Developed with the special contribution of the European Association of Percutaneous Cardiovascular Interventions (EAPCI). *Eur J Cardiothorac Surg* 2014;**46**(4):517-92.
  45. Wolk MJ, Bailey SR, Doherty JU, et al. ACCF/AHA/ASE/ASNC/HFSA/HRS/SCAI/SCCT/SCMR/STS 2013 multimodality appropriate use criteria for the detection and risk assessment of stable ischemic heart disease: a report of the American College of Cardiology Foundation Appropriate Use Criteria Task Force, American Heart Association, American Society of Echocardiography, American Society of Nuclear Cardiology, Heart Failure Society of America, Heart Rhythm Society, Society for Cardiovascular Angiography and Interventions, Society of Cardiovascular Computed Tomography, Society for Cardiovascular Magnetic Resonance, and Society of Thoracic Surgeons. *J Am Coll Cardiol* 2014;**63**(4):380-406.

## List of Guideline Recommendations and Scenarios of Appropriate Use Criteria Assessed in China PEACE-3VD

| Recommendations                                                                                                                                                                                                                                                                                                                                                                                                                                                                                                                                                 | Class of recommendation | Level of evidence |
|-----------------------------------------------------------------------------------------------------------------------------------------------------------------------------------------------------------------------------------------------------------------------------------------------------------------------------------------------------------------------------------------------------------------------------------------------------------------------------------------------------------------------------------------------------------------|-------------------------|-------------------|
| <b>Guideline: 2011 ACCF/AHA Guideline for Coronary Artery Bypass Graft Surgery</b>                                                                                                                                                                                                                                                                                                                                                                                                                                                                              |                         |                   |
| A Heart Team approach to revascularization is recommended in patients with unprotected left main or complex CAD                                                                                                                                                                                                                                                                                                                                                                                                                                                 | I                       | C                 |
| CABG to improve survival is recommended for patients with significant ( $\geq 50\%$ diameter stenosis) left main coronary artery stenosis                                                                                                                                                                                                                                                                                                                                                                                                                       | I                       | B                 |
| PCI to improve survival is reasonable as an alternative to CABG in selected stable patients with significant ( $\geq 50\%$ diameter stenosis) unprotected left main CAD with: 1) anatomic conditions associated with a low risk of PCI procedural complications and a high likelihood of good long-term outcome (e.g., a low SYNTAX score [ $\leq 22$ ], ostial or trunk left main CAD); and 2) clinical characteristics that predict a significantly increased risk of adverse surgical outcomes (e.g., STS-predicted risk of operative mortality $\geq 5\%$ ) | IIa                     | B                 |
| PCI to improve survival may be reasonable as an alternative to CABG in selected stable patients with significant ( $\geq 50\%$ diameter stenosis) unprotected left main CAD with: 1) anatomic conditions associated with a low to intermediate risk                                                                                                                                                                                                                                                                                                             | IIb                     | B                 |

|                                                                                                                                                                                                                                                                                                                                                                                                                                                  |     |   |
|--------------------------------------------------------------------------------------------------------------------------------------------------------------------------------------------------------------------------------------------------------------------------------------------------------------------------------------------------------------------------------------------------------------------------------------------------|-----|---|
| of PCI procedural complications and an intermediate to high likelihood of good long-term outcome (e.g., low–intermediate SYNTAX score of <33, bifurcation left main CAD); and 2) clinical characteristics that predict an increased risk of adverse surgical outcomes (e.g., moderate–severe chronic obstructive pulmonary disease, disability from previous stroke, or previous cardiac surgery; STS-predicted risk of operative mortality >2%) |     |   |
| PCI to improve survival should not be performed in stable patients with significant (≥50% diameter stenosis) unprotected left main CAD who have unfavorable anatomy for PCI and who are good candidates for CABG                                                                                                                                                                                                                                 | III | B |
| CABG to improve survival is beneficial in patients with significant (≥70% diameter) stenoses in 3 major coronary arteries (with or without involvement of the proximal LAD artery) or in the proximal LAD plus 1 other major coronary artery                                                                                                                                                                                                     | I   | B |
| It is reasonable to choose CABG over PCI to improve survival in patients with complex 3-vessel CAD (e.g., SYNTAX score >22), with or without involvement of the proximal LAD artery, who are good candidates for CABG                                                                                                                                                                                                                            | IIa | B |
| CABG is probably recommended in preference to PCI to improve survival in patients with multivessel CAD and diabetes mellitus, particularly if a LIMA graft can be                                                                                                                                                                                                                                                                                | IIa | B |

|                                                                                                                                                                                                                                                                                                                                                                                    |   |   |
|------------------------------------------------------------------------------------------------------------------------------------------------------------------------------------------------------------------------------------------------------------------------------------------------------------------------------------------------------------------------------------|---|---|
| anastomosed to the LAD artery                                                                                                                                                                                                                                                                                                                                                      |   |   |
| Perioperative management, e.g., aspirin (100 mg to 325 mg daily) should be administered to CABG patients preoperatively                                                                                                                                                                                                                                                            | - | - |
| <b>Guideline: 2011 ACCF/AHA/SCAI Guideline for Percutaneous Coronary Intervention[17]</b>                                                                                                                                                                                                                                                                                          |   |   |
| Postprocedural considerations in patients undergoing PCI, e.g., postprocedural considerations in patients undergoing PCI                                                                                                                                                                                                                                                           | - | - |
| <b>Guideline: 2014 ACC/AHA/AATS/PCNA/SCAI/STS focused update of the guideline for the diagnosis and management of patients with stable ischemic heart disease</b>                                                                                                                                                                                                                  |   |   |
| A Heart Team approach to revascularization is recommended in patients with diabetes mellitus and complex multivessel CAD                                                                                                                                                                                                                                                           | I | C |
| CABG is generally recommended in preference to PCI to improve survival in patients with diabetes mellitus and multivessel CAD for which revascularization is likely to improve survival (3-vessel CAD or complex 2-vessel CAD involving the proximal LAD), particularly if a LIMA graft can be anastomosed to the LAD artery, provided the patient is a good candidate for surgery | I | B |
| <b>Guideline: 2014 ESC/EACTS Guidelines on myocardial revascularization</b>                                                                                                                                                                                                                                                                                                        |   |   |
| CABG: Left main disease with a SYNTAX score 22.                                                                                                                                                                                                                                                                                                                                    | I | B |
| PCI: Left main disease with a SYNTAX score 22.                                                                                                                                                                                                                                                                                                                                     | I | B |

|                                                                                                                                                                                                                                                                                                                                                                |     |   |
|----------------------------------------------------------------------------------------------------------------------------------------------------------------------------------------------------------------------------------------------------------------------------------------------------------------------------------------------------------------|-----|---|
| CABG: Left main disease with a SYNTAX score 23–32.                                                                                                                                                                                                                                                                                                             | I   | B |
| PCI: Left main disease with a SYNTAX score 23–32.                                                                                                                                                                                                                                                                                                              | IIa | B |
| CABG: Left main disease with a SYNTAX score >32                                                                                                                                                                                                                                                                                                                | I   | B |
| PCI: Left main disease with a SYNTAX score >32                                                                                                                                                                                                                                                                                                                 | III | B |
| CABG: Three-vessel disease with a SYNTAX score $\leq 22$                                                                                                                                                                                                                                                                                                       | I   | A |
| PCI: Three-vessel disease with a SYNTAX score $\leq 22$                                                                                                                                                                                                                                                                                                        | I   | B |
| CABG: Three-vessel disease with a SYNTAX score 23–32                                                                                                                                                                                                                                                                                                           | I   | A |
| PCI: Three-vessel disease with a SYNTAX score 23–32                                                                                                                                                                                                                                                                                                            | III | B |
| CABG: Three-vessel disease with a SYNTAX score >32                                                                                                                                                                                                                                                                                                             | I   | A |
| PCI: Three-vessel disease with a SYNTAX score >32                                                                                                                                                                                                                                                                                                              | III | B |
| Long-term medical therapy after myocardial revascularization to improve prognosis and recommendations for lifestyle changes and participation in cardiac rehabilitation programmes, e.g. statin therapy with an LDL-C goal <70 mg/dL (<1.8 mmol/L) is indicated to start and continue in all patients with CAD after revascularization, unless contraindicated | -   | - |
| <b>Guideline: ACCF/AHA/ASE/ASNC/HFSA/HRS/SCAI/SCCT/SCMR/STS 2013</b>                                                                                                                                                                                                                                                                                           |     |   |
| <b>multimodality appropriate use criteria for the detection and risk assessment of stable ischemic heart disease</b>                                                                                                                                                                                                                                           |     |   |
| Prior testing without intervening revascularization                                                                                                                                                                                                                                                                                                            | -   | - |

|                                                                                                                                                                               |   |   |
|-------------------------------------------------------------------------------------------------------------------------------------------------------------------------------|---|---|
| Detection and risk assessment of stable ischemic heart disease after revascularization (PCI or CABG), e.g., symptomatic or asymptomatic with incomplete revascularization     | - | - |
| <b>Guideline: ACCF/SCAI/STS/AATS/AHA/ASNC/HFSA/SCCT 2012 appropriate use criteria for coronary revascularization focused update</b>                                           |   |   |
| Revascularization for patients without prior bypass surgery                                                                                                                   | - | - |
| Method of revascularization for multivessel CAD, CCS angina greater than or equal to class III, and/or evidence of intermediate- to high-risk findings on noninvasive testing | - | - |

ACCF indicates American College of Cardiology Foundation; AHA indicates American Heart Association; CAD indicates coronary artery disease; CABG indicates coronary artery bypass grafting; PCI indicates percutaneous coronary intervention; STS indicates Society of Thoracic Surgeons; LAD indicates left anterior descending artery; LIMA indicates left internal mammary artery; SCAI indicates Society for Cardiovascular Angiography and Interventions; AATS indicates American Association for Thoracic Surgery; PCNA indicates Preventive Cardiovascular Nurses Association; ESC indicates European Society of Cardiology; EACTS indicates European Association for Cardio-Thoracic Surgery; LDL-C indicates low-density lipoprotein cholesterol; ASE indicates American Society of Echocardiography; HFSA indicates Heart Failure Society of America; HRS indicates Heart Rhythm Society; SCCT indicates Society of Cardiovascular Computed Tomography; SCMR indicates Society for Cardiovascular Magnetic Resonance; ASNC indicates American Society of Nuclear Cardiology; CCS indicates Canadian Cardiovascular Society.

## Case Report Form

| Table Label         | Variables label                            | Type             | Data Coding                                                                                                                                         | Logical Requirements of Interface                                                    |
|---------------------|--------------------------------------------|------------------|-----------------------------------------------------------------------------------------------------------------------------------------------------|--------------------------------------------------------------------------------------|
| Front Page          | 1.Study Number                             | Input            |                                                                                                                                                     | FPNUM=TCNUM<br>Should Be Identical with the Last Question                            |
| Front Page          | 2.Patient ID                               | Input            |                                                                                                                                                     |                                                                                      |
| Front Page          | 3.Name                                     | Input            |                                                                                                                                                     |                                                                                      |
| Front Page          | 4.Sex                                      | Single Choice    | 1=Male<br>2=Female                                                                                                                                  |                                                                                      |
| Front Page          | 5.Date of Birth                            | Calendar Format  |                                                                                                                                                     |                                                                                      |
| Front Page          | 6.Address                                  | Input            |                                                                                                                                                     |                                                                                      |
| Front Page          | 7.Name of Contact Person-1                 | Input            |                                                                                                                                                     | IF FPTIME1=999, hide FPNUMG1、FPNUMM1、FPTIME2、FPNUMG2、FPNUMM2、FPTIME3、FPNUMG3、FPNUMM3 |
| Front Page          | 8.Contact Person-Fixed Telephone Number-1  | Input            |                                                                                                                                                     |                                                                                      |
| Front Page          | 9.Contact Person-Mobile Telephone Number-1 | Input            |                                                                                                                                                     |                                                                                      |
| Front Page          | 10.Name of Contact Person-2                | Input            |                                                                                                                                                     | IF FPTIME2=999 , hide FPNUMG2、FPNUMM2、FPTIME3、FPNUMG3、FPNUMM3                        |
| Front Page          | 8.Contact Person-Fixed Telephone Number-2  | Input            |                                                                                                                                                     |                                                                                      |
| Front Page          | 9.Contact Person-Mobile Telephone Number-2 | Input            |                                                                                                                                                     |                                                                                      |
| Front Page          | 10.Name of Contact Person-2                | Input            |                                                                                                                                                     | IF FPTIME3=999, hide FPNUMG3、FPNUMM3                                                 |
| Front Page          | 8.Contact Person-Fixed Telephone Number-3  | Input            |                                                                                                                                                     |                                                                                      |
| Front Page          | 9.Contact Person-Mobile Telephone Number-3 | Input            |                                                                                                                                                     |                                                                                      |
| Front Page          | 16.Admission Date                          | Calendar Format  |                                                                                                                                                     | FPCD>FPED or FPCD=FPED                                                               |
| Front Page          | 17.Discharge Date                          | Calendar Format  |                                                                                                                                                     | FPCD>FPED or FPCD=FPED                                                               |
| Front Page          | 18.Insurance Payer                         | Single Choice    | 1=Urban Inhabitants/Employees Medical Insurance<br>2=Commercial Insurance<br>3=Charged Medical Service<br>4= Government-Reimbursed Care<br>5=Others | FPFKFS=5 , then no other options should be checked                                   |
| Front Page          | 19.Total Cost(yuan)                        | Input            |                                                                                                                                                     |                                                                                      |
| Admission Diagnosis | 1.Admission Diagnosis(CHD related)         |                  |                                                                                                                                                     |                                                                                      |
| Admission Diagnosis | 1-[1]Coronary Heart Disease                | Multiple Choices | 1                                                                                                                                                   |                                                                                      |



| Table Label         | Variables label                                    | Type             | Data Coding | Logical Requirements of Interface |
|---------------------|----------------------------------------------------|------------------|-------------|-----------------------------------|
| Admission Diagnosis | 1-[2]Coronary Heart Disease Suspected(CHD?)        | Multiple Choices | 1           |                                   |
| Admission Diagnosis | 1-[3]Acute Coronary Syndrome                       | Multiple Choices | 1           |                                   |
| Admission Diagnosis | 1-[4]Acute Coronary Syndrome Suspected(ACS?)       | Multiple Choices | 1           |                                   |
| Admission Diagnosis | 1-[5]Acute Extensive Anterior MI                   | Multiple Choices | 1           |                                   |
| Admission Diagnosis | 1-[6]Acute Anterior MI                             | Multiple Choices | 1           |                                   |
| Admission Diagnosis | 1-[7]Acute Inferior MI                             | Multiple Choices | 1           |                                   |
| Admission Diagnosis | 1-[8]Acute Lateral MI                              | Multiple Choices | 1           |                                   |
| Admission Diagnosis | 1-[9]Acute Posterior MI                            | Multiple Choices | 1           |                                   |
| Admission Diagnosis | 1-[10]Acute Right Ventricular Infarction           | Multiple Choices | 1           |                                   |
| Admission Diagnosis | 1-[11]Acute Non ST-elevation myocardial infarction | Multiple Choices | 1           |                                   |
| Admission Diagnosis | 1-[12]Acute ST-elevation myocardial infarction     | Multiple Choices | 1           |                                   |
| Admission Diagnosis | 1-[13]Acute Subendocardial Infarction              | Multiple Choices | 1           |                                   |
| Admission Diagnosis | 1-[14]Acute myocardial infarction                  | Multiple Choices | 1           |                                   |
| Admission Diagnosis | 1-[15]Acute myocardial infarction Suspected(?)     | Multiple Choices | 1           |                                   |
| Admission Diagnosis | 1-[16]Old myocardial infarction(Q-wave MI )        | Multiple Choices | 1           |                                   |
| Admission Diagnosis | 1-[17]Unstable Angina Pectoris                     | Multiple Choices | 1           |                                   |
| Admission Diagnosis | 1-[18]Variant Angina Pectoris                      | Multiple Choices | 1           |                                   |
| Admission Diagnosis | 1-[19]Stable Angina pectoris                       | Multiple Choices | 1           |                                   |
| Admission Diagnosis | 1-[20]Angina Pectoris(Undetermined)                | Multiple Choices | 1           |                                   |
| Admission Diagnosis | 1-[21]Post-CABG                                    | Multiple Choices | 1           |                                   |
| Admission Diagnosis | 1-[22]Post-PCI                                     | Multiple Choices | 1           |                                   |
| Admission Diagnosis | 1-[23]Coronary Artery Dysplasia                    | Multiple Choices | 1           |                                   |
| Admission Diagnosis | 1-[24]Muscle Bridge                                | Multiple Choices | 1           |                                   |
| Admission Diagnosis | 1-[25]Doubtful Symptoms                            | Multiple Choices | 1           |                                   |
| Admission Diagnosis | 1-[26]None of above                                | Multiple Choices | 1           |                                   |
| Admission Diagnosis | 2.Admission Diagnosis(Others)                      |                  |             |                                   |
| Admission Diagnosis | 2-[1]Cardiac Arrest                                | Multiple Choices | 1           |                                   |
| Admission           | 2-[2]Cardiac Shock                                 | Multiple         | 1           |                                   |

| Table Label         | Variables label                                                                         | Type             | Data Coding | Logical Requirements of Interface |
|---------------------|-----------------------------------------------------------------------------------------|------------------|-------------|-----------------------------------|
| Diagnosis           |                                                                                         | Choices          |             |                                   |
| Admission Diagnosis | 2-[3]Ventricular Fibrillation                                                           | Multiple Choices | 1           |                                   |
| Admission Diagnosis | 2-[4]Ventricular Tachycardia                                                            | Multiple Choices | 1           |                                   |
| Admission Diagnosis | 2-[5]Atrial Fibrillation                                                                | Multiple Choices | 1           |                                   |
| Admission Diagnosis | 2-[6]Acute Heart Failure                                                                | Multiple Choices | 1           |                                   |
| Admission Diagnosis | 2-[7]Chronic Heart Failure                                                              | Multiple Choices | 1           |                                   |
| Admission Diagnosis | 2-[8]Heart Failure(Undetermined)                                                        | Multiple Choices | 1           |                                   |
| Admission Diagnosis | 2-[9] Acute Pulmonary Edema                                                             | Multiple Choices | 1           |                                   |
| Admission Diagnosis | 2-[10]Acute Hemorrhagic Stroke (Cerebral Hemorrhage/ Subarachnoid Hemorrhage)           | Multiple Choices | 1           |                                   |
| Admission Diagnosis | 2-[11]Acute Ischemic Stroke(Cerebral Infarction/Cerebral Embolism /Cerebral Thrombosis) | Multiple Choices | 1           |                                   |
| Admission Diagnosis | 2-[12]Acute Stroke (Undetermined)                                                       | Multiple Choices | 1           |                                   |
| Admission Diagnosis | 2-[13]Anemia                                                                            | Multiple Choices | 1           |                                   |
| Admission Diagnosis | 2-[14]Gastrointestinal Bleeding                                                         | Multiple Choices | 1           |                                   |
| Admission Diagnosis | 2-[15]Chronic Renal Failure                                                             | Multiple Choices | 1           |                                   |
| Admission Diagnosis | 2-[16]Dialysis(Peritoneal Dialysis/Hemodialysis)                                        | Multiple Choices | 1           |                                   |
| Admission Diagnosis | 2-[17]Hyperlipidemia (lipid abnormality)                                                | Multiple Choices | 1           |                                   |
| Admission Diagnosis | 2-[18]Hyperlipidemia (lipid abnormality)                                                | Multiple Choices | 1           |                                   |
| Admission Diagnosis | 2-[19]High Blood Pressure                                                               | Multiple Choices | 1           |                                   |
| Admission Diagnosis | 2-[20]Diabetes Mellitus                                                                 | Multiple Choices | 1           |                                   |
| Admission Diagnosis | 2-[21]Diabetic Nephropathy                                                              | Multiple Choices | 1           |                                   |
| Admission Diagnosis | 2-[22] Rheumatic Heart Disease                                                          | Multiple Choices | 1           |                                   |
| Admission Diagnosis | 2-[23]Valvular Heart Disease                                                            | Multiple Choices | 1           |                                   |
| Admission Diagnosis | 2-[24]Heart Valve Replacement History                                                   | Multiple Choices | 1           |                                   |
| Admission Diagnosis | 2-[25] Takayasu Arteritis                                                               | Multiple Choices | 1           |                                   |
| Admission Diagnosis | 2-[26]Kawasaki Disease                                                                  | Multiple Choices | 1           |                                   |
| Admission Diagnosis | 2-[27]Acute Gastric Ulcer                                                               | Multiple Choices | 1           |                                   |
| Admission Diagnosis | 2-[28]Chronic Gastric Ulcer                                                             | Multiple Choices | 1           |                                   |

| Table Label          | Variables label                                   | Type             | Data Coding                                                                                                                 | Logical Requirements of Interface                                                                      |
|----------------------|---------------------------------------------------|------------------|-----------------------------------------------------------------------------------------------------------------------------|--------------------------------------------------------------------------------------------------------|
| Admission Diagnosis  | 2-[29]Other Gastric Disease                       | Multiple Choices | 1                                                                                                                           |                                                                                                        |
| Admission Diagnosis  | 2-[30] Thyroid Diseases                           | Multiple Choices | 1                                                                                                                           |                                                                                                        |
| Admission Diagnosis  | 2-[31] Gastroesophageal Reflux                    | Multiple Choices | 1                                                                                                                           |                                                                                                        |
| Admission Diagnosis  | 2-[32]Esophageal Spasm                            | Multiple Choices | 1                                                                                                                           |                                                                                                        |
| Admission Diagnosis  | 2-[33]Cholelithiasis                              | Multiple Choices | 1                                                                                                                           |                                                                                                        |
| Admission Diagnosis  | 2-[34]Carotid Stenosis                            | Multiple Choices | 1                                                                                                                           |                                                                                                        |
| Admission Diagnosis  | 2-[35]None of Above                               | Multiple Choices | 1                                                                                                                           |                                                                                                        |
| Admission Diagnosis  | 3.NYHA Functional Class                           | Single Choice    | 1=Unknown<br>2=Class I<br>3=Class II<br>4=Class III<br>5=Class IV                                                           |                                                                                                        |
| Admission Diagnosis  | 4.CCS Class of Angina                             | Single Choice    | 1=Unknown<br>2=Class I<br>3=Class II<br>4=Class III<br>5=Class IV                                                           |                                                                                                        |
| Discharge R report 1 | 1.In-hospital Clinical Event                      |                  |                                                                                                                             |                                                                                                        |
| Discharge R report 1 | 1-[1]Death                                        | Single Choice    | 1=No<br>2=Yes                                                                                                               | If DSDTH=1 hide DSDTHD and DSDTHRE. If DSDTH=2 , Discharge Report 4, Discharge Medication are shielded |
| Discharge R report 1 | 1-[2]Death Date/Time                              | Calendar Format  |                                                                                                                             | DSDTH=2 and DSDTHD is not null<br>DSDTHD>FPED                                                          |
| Discharge R report 1 | 1-[3]Primary Cause of Death                       | Single Choice    | 1=Cardiac<br>2=Neurological<br>3=Renal<br>4=Vascular<br>5=Infection<br>6=Respiratory<br>7=Valvular<br>8=Unknown<br>9=Others | DSDTH=2 and DSDTHRE is not null;DSDTHRE=9,DSDCY is not null                                            |
| Discharge R report 1 | 1-[3]-[9]Other Causes of Death                    |                  |                                                                                                                             | DSDTHRE=9,DSDCY is not null                                                                            |
| Discharge R report 1 | 2.Patient Refuses the Following Procedures or not |                  |                                                                                                                             |                                                                                                        |
| Discharge R report 1 | 2-[1]Refuse PCI                                   | Multiple Choices | 1                                                                                                                           | DSJCZ01=1 , DSJCZ04 is not null                                                                        |
| Discharge R report 1 | 2-[2]Refuse CABG                                  | Multiple Choices | 1                                                                                                                           | DSJCZ02=1 , DSJCZ05 is not null                                                                        |
| Discharge R report 1 | 2-[3]Not Recorded                                 | Multiple Choices | 1                                                                                                                           | DSJCZ03=1 , DSJCZ01,DSJCZ02 is null, hide DSJCZ04、 DSJCZ05                                             |
| Discharge R report 1 | 2-[4]The Reason of the Refusal of PCI             | Single Choice    | 1=For Economic Reasons<br>2=For Operation Risks<br>3=Transferring to Other Hospitals for                                    | DSJCZ01=1 , DSJCZ04 is not null                                                                        |

| Table Label        | Variables label                             | Type             | Data Coding                                                                                                                 | Logical Requirements of Interface |
|--------------------|---------------------------------------------|------------------|-----------------------------------------------------------------------------------------------------------------------------|-----------------------------------|
|                    |                                             |                  | PCI<br>4=Others<br>5=Not Recorded                                                                                           |                                   |
| Discharge Report 1 | 2-[5]The Reason of the Refusal of CABG      | Single Choice    | 1=For Economic Reasons<br>2=For Operation Risks<br>3=Transferring to Other Hospitals for CABG<br>4=Others<br>5=Not Recorded | DSJCZ02=1 , DSJCZ05 is not null   |
| Discharge Report 1 | 3.In-hospital Event                         |                  |                                                                                                                             |                                   |
| Discharge Report 1 | 3-[1]Recurrent MI                           | Multiple Choices | 1                                                                                                                           |                                   |
| Discharge Report 1 | 3-[2]Recurrent Angina Pectoris              | Multiple Choices | 1                                                                                                                           |                                   |
| Discharge Report 1 | 3-[3]Rupture of the Free Wall of Heart      | Multiple Choices | 1                                                                                                                           |                                   |
| Discharge Report 1 | 3-[4]Rupture of Papillary Muscle            | Multiple Choices | 1                                                                                                                           |                                   |
| Discharge Report 1 | 3-[5]Ventricular Septal Rupture             | Multiple Choices | 1                                                                                                                           |                                   |
| Discharge Report 1 | 3-[6]Cardiac Tamponade                      | Multiple Choices | 1                                                                                                                           |                                   |
| Discharge Report 1 | 3-[7]Pericardial Effusion                   | Multiple Choices | 1                                                                                                                           |                                   |
| Discharge Report 1 | 3-[8]Cardiac Shock                          | Multiple Choices | 1                                                                                                                           |                                   |
| Discharge Report 1 | 3-[9]Cardiac Arrest                         | Multiple Choices | 1                                                                                                                           |                                   |
| Discharge Report 1 | 3-[10]CPR                                   | Multiple Choices | 1                                                                                                                           |                                   |
| Discharge Report 1 | 3-[11]Atrial Fibrillation                   | Multiple Choices | 1                                                                                                                           |                                   |
| Discharge Report 1 | 3-[12]Ventricular Tachycardia               | Multiple Choices | 1                                                                                                                           |                                   |
| Discharge Report 1 | 3-[13]Ventricular Fibrillation              | Multiple Choices | 1                                                                                                                           |                                   |
| Discharge Report 1 | 3-[14]Acute Heart Failure                   | Multiple Choices | 1                                                                                                                           |                                   |
| Discharge Report 1 | 3-[15]Exacerbation of Chronic Heart Failure | Multiple Choices | 1                                                                                                                           |                                   |
| Discharge Report 1 | 3-[16]Heart Failure(Undetermined)           | Multiple Choices | 1                                                                                                                           |                                   |
| Discharge Report 1 | 3-[17] Acute Pulmonary Edema                | Multiple Choices | 1                                                                                                                           |                                   |
| Discharge Report 1 | 3-[18] Respiratory Failure                  | Multiple Choices | 1                                                                                                                           |                                   |
| Discharge Report 1 | 3-[19]Gastrointestinal Bleeding             | Multiple Choices | 1                                                                                                                           |                                   |
| Discharge Report 1 | 3-[20]Urogenital Bleeding                   | Multiple Choices | 1                                                                                                                           |                                   |
| Discharge Report 1 | 3-[21] Intracranial /Subdural Hemorrhage    | Multiple Choices | 1                                                                                                                           |                                   |
| Discharge Report 1 | 3-[22]Retroperitoneal Hemorrhage            | Multiple Choices | 1                                                                                                                           |                                   |
| Discharge Report 1 | 3-[23]Bleeding/Hematoma                     | Multiple Choices | 1                                                                                                                           |                                   |

| Table Label        | Variables label                                                                            | Type             | Data Coding | Logical Requirements of Interface |
|--------------------|--------------------------------------------------------------------------------------------|------------------|-------------|-----------------------------------|
|                    | a in Puncture Site                                                                         |                  |             |                                   |
| Discharge Report 1 | 3-[24]Pericardial Bleeding                                                                 | Multiple Choices | 1           |                                   |
| Discharge Report 1 | 3-[25]Bleeding (Position is not Indicated)                                                 | Multiple Choices | 1           |                                   |
| Discharge Report 1 | 3-[26]Hemorrhagic Shock                                                                    | Multiple Choices | 1           |                                   |
| Discharge Report 1 | 3-[27]Venous Thromboembolism                                                               | Multiple Choices | 1           |                                   |
| Discharge Report 1 | 3-[28]Pulmonary Embolism                                                                   | Multiple Choices | 1           |                                   |
| Discharge Report 1 | 3-[29]Deep Venous Thrombosis                                                               | Multiple Choices | 1           |                                   |
| Discharge Report 1 | 3-[30]Acute Ischemia Stroke(Cerebral Infarction/Cerebral Embolism/Cerebral Thrombosis/TIA) | Multiple Choices | 1           |                                   |
| Discharge Report 1 | 3-[31]Acute Hemorrhage Stroke(Cerebral Hemorrhage/ Subarachnoid Hemorrhage)                | Multiple Choices | 1           |                                   |
| Discharge Report 1 | 3-[32]Acute Stroke(Undetermined)                                                           | Multiple Choices | 1           |                                   |
| Discharge Report 1 | 3-[33]Acute Renal Failure                                                                  | Multiple Choices | 1           |                                   |
| Discharge Report 1 | 3-[34]Dialysis(Hemodialysis/Peritoneal Dialysis)                                           | Multiple Choices | 1           |                                   |
| Discharge Report 1 | 3-[35]Adverse Contrast media reaction (Including Serious Allergy)                          | Multiple Choices | 1           |                                   |
| Discharge Report 1 | 3-[36]Contrast Induced Nephropathy (CIN)                                                   | Multiple Choices | 1           |                                   |
| Discharge Report 1 | 3-[37]Thrombocytopenia                                                                     | Multiple Choices | 1           |                                   |
| Discharge Report 1 | 3-[38]Infection (In-hospital Infection)                                                    | Multiple Choices | 1           |                                   |
| Discharge Report 1 | 3-[39]None of Above                                                                        | Multiple Choices | 1           |                                   |
| Discharge Report 2 | 4.Discharge Admission (CHD related)                                                        |                  |             |                                   |
| Discharge Report 2 | 4-[1]Coronary Heart Disease                                                                | Multiple Choices | 1           |                                   |
| Discharge Report 2 | 4-[2]Acute Coronary Syndrome                                                               | Multiple Choices | 1           |                                   |
| Discharge Report 2 | 4-[3]Acute Extensive Anterior MI                                                           | Multiple Choices | 1           |                                   |
| Discharge Report 2 | 4-[4]Acute Anterior MI                                                                     | Multiple Choices | 1           |                                   |
| Discharge Report 2 | 4-[5]Acute Anteroseptal MI                                                                 | Multiple Choices | 1           |                                   |
| Discharge Report 2 | 4-[6]Acute Inferior MI                                                                     | Multiple Choices | 1           |                                   |
| Discharge Report 2 | 4-[7]Acute Lateral MI                                                                      | Multiple Choices | 1           |                                   |
| Discharge Report 2 | 4-[8]Acute Posterior MI                                                                    | Multiple         | 1           |                                   |

| Table Label        | Variables label                                    | Type             | Data Coding | Logical Requirements of Interface |
|--------------------|----------------------------------------------------|------------------|-------------|-----------------------------------|
| Report 2           |                                                    | Choices          |             |                                   |
| Discharge Report 2 | 4-[9]Acute Right Ventricular MI                    | Multiple Choices | 1           |                                   |
| Discharge Report 2 | 4-[10]Acute Non ST-elevation myocardial infarction | Multiple Choices | 1           |                                   |
| Discharge Report 2 | 4-[11]Acute ST-elevation myocardial infarction     | Multiple Choices | 1           |                                   |
| Discharge Report 2 | 4-[12]Acute Subendocardial Infarction              | Multiple Choices | 1           |                                   |
| Discharge Report 2 | 4-[13]Acute myocardial infarction                  | Multiple Choices | 1           |                                   |
| Discharge Report 2 | 4-[14]Old myocardial infarction(Q-wave MI )        | Multiple Choices | 1           |                                   |
| Discharge Report 2 | 4-[15]Unstable Angina Pectoris                     | Multiple Choices | 1           |                                   |
| Discharge Report 2 | 4-[16]Stable Angina pectoris                       | Multiple Choices | 1           |                                   |
| Discharge Report 2 | 4-[17]Variant Angina Pectoris                      | Multiple Choices | 1           |                                   |
| Discharge Report 2 | 4-[18]Angina Pectoris(Undetermined)                | Multiple Choices | 1           |                                   |
| Discharge Report 2 | 4-[19]Post-CABG                                    | Multiple Choices | 1           |                                   |
| Discharge Report 2 | 4-[20]Coronary Artery Dysplasia                    | Multiple Choices | 1           |                                   |
| Discharge Report 2 | 4-[21]Muscle Bridge                                | Multiple Choices | 1           |                                   |
| Discharge Report 2 | 4-[22]Doubtful Symptoms                            | Multiple Choices | 1           |                                   |
| Discharge Report 2 | 4-[23]PCI-related MI                               | Multiple Choices | 1           |                                   |
| Discharge Report 2 | 4-[24]None of Above                                | Multiple Choices | 1           |                                   |
| Discharge Report 3 | 5.Discharge Diagnosis(Others)                      |                  |             |                                   |
| Discharge Report 3 | 5-[1]Cardiac Arrest                                | Multiple Choices | 1           |                                   |
| Discharge Report 3 | 5-[2]Cardiac Shock                                 | Multiple Choices | 1           |                                   |
| Discharge Report 3 | 5-[3]Rupture of the Free Wall of Heart             | Multiple Choices | 1           |                                   |
| Discharge Report 3 | 5-[4]Rupture of papillary muscle                   | Multiple Choices | 1           |                                   |
| Discharge Report 3 | 5-[5]Ventricular Septal Rupture                    | Multiple Choices | 1           |                                   |
| Discharge Report 3 | 5-[6]Cardiac Tamponade                             | Multiple Choices | 1           |                                   |
| Discharge Report 3 | 5-[7]Pericardial Effusion                          | Multiple Choices | 1           |                                   |
| Discharge Report 3 | 5-[8]CPR                                           | Multiple Choices | 1           |                                   |
| Discharge Report 3 | 5-[9]Ventricular Fibrillation                      | Multiple Choices | 1           |                                   |
| Discharge Report 3 | 5-[10]Ventricular Tachycardia                      | Multiple Choices | 1           |                                   |
| Discharge Report 3 | 5-[11]Atrial Fibrillation                          | Multiple Choices | 1           |                                   |

| Table Label        | Variables label                                                                         | Type             | Data Coding | Logical Requirements of Interface |
|--------------------|-----------------------------------------------------------------------------------------|------------------|-------------|-----------------------------------|
| Discharge Report 3 | 5-[12]Atrial Flutter                                                                    | Multiple Choices | 1           |                                   |
| Discharge Report 3 | 5-[13]Acute Heart Failure                                                               | Multiple Choices | 1           |                                   |
| Discharge Report 3 | 5-[14]Chronic Heart Failure                                                             | Multiple Choices | 1           |                                   |
| Discharge Report 3 | 5-[15]Heart Failure(Undetermined)                                                       | Multiple Choices | 1           |                                   |
| Discharge Report 3 | 5-[16]Acute Pulmonary Edema                                                             | Multiple Choices | 1           |                                   |
| Discharge Report 3 | 5-[17]Acute Ischemic Stroke(Cerebral Infarction/Cerebral Embolism /Cerebral Thrombosis) | Multiple Choices | 1           |                                   |
| Discharge Report 3 | 5-[18]Acute Hemorrhagic Stroke (Cerebral Hemorrhage/ Subarachnoid Hemorrhage)           | Multiple Choices | 1           |                                   |
| Discharge Report 3 | 5-[19]Acute Stroke (Undetermined)                                                       | Multiple Choices | 1           |                                   |
| Discharge Report 3 | 5-[20]Anemia                                                                            | Multiple Choices | 1           |                                   |
| Discharge Report 3 | 5-[21]Gastrointestinal Bleeding                                                         | Multiple Choices | 1           |                                   |
| Discharge Report 3 | 5-[22]Urogenital Bleeding                                                               | Multiple Choices | 1           |                                   |
| Discharge Report 3 | 5-[23] Intracranial /Subdural Hemorrhage                                                | Multiple Choices | 1           |                                   |
| Discharge Report 3 | 5-[24]Retroperitoneal Hemorrhage                                                        | Multiple Choices | 1           |                                   |
| Discharge Report 3 | 5-[25]Bleeding/Hematoma in Puncture Site                                                | Multiple Choices | 1           |                                   |
| Discharge Report 3 | 5-[26]Pericardial Bleeding                                                              | Multiple Choices | 1           |                                   |
| Discharge Report 3 | 5-[27] Bleeding(Position is not Indicated)                                              | Multiple Choices | 1           |                                   |
| Discharge Report 3 | 5-[28]Hemorrhagic Shock                                                                 | Multiple Choices | 1           |                                   |
| Discharge Report 3 | 5-[29]Venous Thromboembolism                                                            | Multiple Choices | 1           |                                   |
| Discharge Report 3 | 5-[30]Pulmonary Embolism                                                                | Multiple Choices | 1           |                                   |
| Discharge Report 3 | 5-[31]Deep Venous Thrombosis                                                            | Multiple Choices | 1           |                                   |
| Discharge Report 3 | 5-[32]Chronic Renal Failure                                                             | Multiple Choices | 1           |                                   |
| Discharge Report 3 | 5-[33]Dialysis(Peritoneal Dialysis/Hemodialysis)                                        | Multiple Choices | 1           |                                   |
| Discharge Report 3 | 5-[34]Adverse Contrast media reaction(Including Serious Allergy)                        | Multiple Choices | 1           |                                   |
| Discharge Report 3 | 5-[35]Contrast Induced Nephropathy(CIN)                                                 | Multiple Choices | 1           |                                   |
| Discharge Report 3 | 5-[36]Thrombocytopenia                                                                  | Multiple Choices | 1           |                                   |

| Table Label            | Variables label                                                                              | Type                | Data Coding | Logical Requirements of Interface |
|------------------------|----------------------------------------------------------------------------------------------|---------------------|-------------|-----------------------------------|
| Discharge R<br>eport 3 | 5-[37]Infection                                                                              | Multiple<br>Choices | 1           |                                   |
| Discharge R<br>eport 3 | 5-[38]Hyperlipidemia<br>(lipid abnormality)                                                  | Multiple<br>Choices | 1           |                                   |
| Discharge R<br>eport 3 | 5-[39]Hyperlipidemia<br>(lipid abnormality)                                                  | Multiple<br>Choices | 1           |                                   |
| Discharge R<br>eport 3 | 5-[40]High Blood<br>Pressure                                                                 | Multiple<br>Choices | 1           |                                   |
| Discharge R<br>eport 3 | 5-[41]Diabetes Mellitus                                                                      | Multiple<br>Choices | 1           |                                   |
| Discharge R<br>eport 3 | 5-[42]Diabetic<br>Nephropathy                                                                | Multiple<br>Choices | 1           |                                   |
| Discharge R<br>eport 3 | 5-[43]Rheumatic Heart<br>Disease                                                             | Multiple<br>Choices | 1           |                                   |
| Discharge R<br>eport 3 | 5-[44]Valvular Heart<br>Disease                                                              | Multiple<br>Choices | 1           |                                   |
| Discharge R<br>eport 3 | 5-[45]Undergoing Heart<br>Valve Replacement                                                  | Multiple<br>Choices | 1           |                                   |
| Discharge R<br>eport 3 | 5-[46]Takayasu Arteritis                                                                     | Multiple<br>Choices | 1           |                                   |
| Discharge R<br>eport 3 | 5-[47]Kawasaki<br>Disease                                                                    | Multiple<br>Choices | 1           |                                   |
| Discharge R<br>eport 3 | 5-[48]Acute Gastric<br>Ulcer                                                                 | Multiple<br>Choices | 1           |                                   |
| Discharge R<br>eport 3 | 5-[49]Chronic Gastric<br>Ulcer                                                               | Multiple<br>Choices | 1           |                                   |
| Discharge R<br>eport 3 | 5-[50]Other Gastric<br>Disease                                                               | Multiple<br>Choices | 1           |                                   |
| Discharge R<br>eport 3 | 5-[51] Thyroid Diseases                                                                      | Multiple<br>Choices | 1           |                                   |
| Discharge R<br>eport 3 | 5-<br>[52]Gastroesophageal<br>Reflux                                                         | Multiple<br>Choices | 1           |                                   |
| Discharge R<br>eport 3 | 5-[53]Esophageal<br>Spasm                                                                    | Multiple<br>Choices | 1           |                                   |
| Discharge R<br>eport 3 | 5-[54]Cholelithiasis                                                                         | Multiple<br>Choices | 1           |                                   |
| Discharge R<br>eport 3 | 5-[55]Carotid Stenosis                                                                       | Multiple<br>Choices | 1           |                                   |
| Discharge R<br>eport 3 | 5-[56]None of Above                                                                          | Multiple<br>Choices | 1           |                                   |
| Discharge R<br>eport 4 | 6.Patient Education and<br>Instruction                                                       |                     |             |                                   |
| Discharge R<br>eport 4 | 6-[1]Instruction of the<br>Strategy of Discharge<br>Medicine                                 | Multiple<br>Choices | 1           |                                   |
| Discharge R<br>eport 4 | 6-[2]Instruction of the<br>Strategy of Warfarin/<br>lipid-lowering therapy in<br>Out-patient | Multiple<br>Choices | 1           |                                   |
| Discharge R<br>eport 4 | 6-[3]Diabetes Education                                                                      | Multiple<br>Choices | 1           |                                   |
| Discharge R<br>eport 4 | 6-[4]Regular Blood<br>Lipid Evaluation                                                       | Multiple<br>Choices | 1           |                                   |
| Discharge R<br>eport 4 | 6-[5]Diet Instruction                                                                        | Multiple<br>Choices | 1           |                                   |
| Discharge R<br>eport 4 | 6-[6]Weight-Controlling<br>Suggestions                                                       | Multiple<br>Choices | 1           |                                   |
| Discharge R<br>eport 4 | 6-[7]Smoking Cessation<br>Suggestions/consultatio                                            | Multiple<br>Choices | 1           |                                   |



| Table Label             | Variables label                                                       | Type                   | Data Coding                                                                                                                                             | Logical Requirements of Interface                                      |
|-------------------------|-----------------------------------------------------------------------|------------------------|---------------------------------------------------------------------------------------------------------------------------------------------------------|------------------------------------------------------------------------|
|                         | n                                                                     |                        |                                                                                                                                                         |                                                                        |
| Discharge R<br>eport 4  | 6-[8] Instructions of<br>Recourse When<br>Symptoms Deteriorated       | Multiple<br>Choices    | 1                                                                                                                                                       |                                                                        |
| Discharge R<br>eport 4  | 6-[9]Exercise<br>Suggestions                                          | Multiple<br>Choices    | 1                                                                                                                                                       |                                                                        |
| Discharge R<br>eport 4  | 6-[10]The Date of<br>Resumption of Work                               | Multiple<br>Choices    | 1                                                                                                                                                       |                                                                        |
| Discharge R<br>eport 4  | 6-[11]The Date of<br>Resumption Sexual Life                           | Multiple<br>Choices    | 1                                                                                                                                                       |                                                                        |
| Discharge R<br>eport 4  | 6-[12] In-patient<br>Instruction of Heart<br>Rehabilitation           | Multiple<br>Choices    | 1                                                                                                                                                       |                                                                        |
| Discharge R<br>eport 4  | 6-[13] Out-patient<br>Instruction of Heart<br>Rehabilitation          | Multiple<br>Choices    | 1                                                                                                                                                       |                                                                        |
| Discharge R<br>eport 4  | 6-[14]None of Above                                                   |                        |                                                                                                                                                         |                                                                        |
| Discharge R<br>eport 4  | 7.Selective PCI in<br>Stable Condition Is<br>Better<br>Recommended ?  | Single<br>Choice       | 1=Yes<br>2=Unknown                                                                                                                                      |                                                                        |
| Discharge R<br>eport 4  | 8.Selective CABG in<br>Stable Condition Is<br>Better<br>Recommended ? | Single<br>Choice       | 1=Yes<br>2=Unknown                                                                                                                                      |                                                                        |
| Discharge R<br>eport 4  | 9.Discharge Status                                                    | Single<br>Choice       | 1= home care/self-<br>care/community<br>hospital<br>2=Other hospital<br>3=Left against<br>medical advice or<br>discontinued care<br>in severe illness   |                                                                        |
| Discharge R<br>eport 4  | 9-[2]Cause of<br>Transferring to Other<br>Medical Institutions        | Single<br>Choice       | 1=Failed to offer<br>the needed<br>medical service<br>2=Problem in<br>insurance and<br>administration<br>3=Patient will<br>4=Other reasons<br>5=Unknown | DMCYQX=2 and DMCYRE is not<br>null ; DMCYRE=4 , DMCYRER is not<br>null |
| Discharge R<br>eport 4  | 9-[2]-[4]Other<br>Reasons :                                           |                        |                                                                                                                                                         | DMCYRE=4 , DMCYRER is not null                                         |
| Discharge<br>Medication | 1-[1]Discharge<br>Medication 1                                        | Drug<br>Storehous<br>e |                                                                                                                                                         | IF DMAS end with 999 , hide the<br>following variables                 |
| Discharge<br>Medication | 1-[2]Dosage                                                           | Input                  |                                                                                                                                                         |                                                                        |
| Discharge<br>Medication | 1-[3]Unit                                                             | Single<br>Choice       | 1=g<br>2=mg<br>3=ml<br>4=U<br>5=Piece/ #<br>6=U/kg.h<br>7=ug<br>8=MU<br>9=BU                                                                            |                                                                        |

| Table Label          | Variables label              | Type            | Data Coding                                                                                                                            | Logical Requirements of Interface |
|----------------------|------------------------------|-----------------|----------------------------------------------------------------------------------------------------------------------------------------|-----------------------------------|
|                      |                              |                 | 10=%<br>11=Other<br>12=Not Recorded                                                                                                    |                                   |
| Discharge Medication | 1-[4]Frequency of Medication | Single Choice   | 1=Qd /QN<br>2=Bid/q12h<br>3=Tid/q8h<br>4=Q6h<br>5=Once Every Other Day(qod)<br>6=When necessary(sos/prn)<br>7=Other<br>8=Not recorded  |                                   |
| Discharge Medication | 2-[2]Discharge Medication 2  | Drug Storehouse |                                                                                                                                        |                                   |
| Discharge Medication | 2-[2]Dosage                  | Input           |                                                                                                                                        |                                   |
| Discharge Medication | 2-[3]Unit                    | Single Choice   | 1=g<br>2=mg<br>3=ml<br>4=U<br>5=Piece/ #<br>6=U/kg.h<br>7=ug<br>8=MU<br>9=BU<br>10=%<br>11=Others<br>12=Not Recorded                   |                                   |
| Discharge Medication | 2-[4]Frequency of Medication | Single Choice   | 1=Qd /QN<br>2=Bid/q12h<br>3=Tid/q8h<br>4=Q6h<br>5=Once Every Other Day(qod)<br>6=When Necessary(sos/prn)<br>7=Others<br>8=Not Recorded |                                   |
| Discharge Medication | 3-[1]Discharge Medication 3  | Drug Storehouse |                                                                                                                                        |                                   |
| Discharge Medication | 3-[2]Dosage                  | Input           |                                                                                                                                        |                                   |
| Discharge Medication | 3-[3]Unit                    | Single Choice   | 1=g<br>2=mg<br>3=ml<br>4=U<br>5=Piece/ #<br>6=U/kg.h<br>7=ug<br>8=MU<br>9=BU<br>10=%<br>11=Others<br>12=Not Recorded                   |                                   |
| Discharge Medication | 3-[4]Frequency of Medication | Single Choice   | 1=Qd /QN<br>2=Bid/q12h<br>3=Tid/q8h<br>4=Q6h                                                                                           |                                   |

| Table Label          | Variables label              | Type            | Data Coding                                                                                                                            | Logical Requirements of Interface |
|----------------------|------------------------------|-----------------|----------------------------------------------------------------------------------------------------------------------------------------|-----------------------------------|
|                      |                              |                 | 5=Once Every Other Day(qod)<br>6=When Necessary(sos/prn)<br>7=Others<br>8=Not Recorded                                                 |                                   |
| Discharge Medication | 4-[1]Discharge Medication4   | Drug Storehouse |                                                                                                                                        |                                   |
| Discharge Medication | 4-[2]Dosage                  | Input           |                                                                                                                                        |                                   |
| Discharge Medication | 4-[3]Unit                    | Single Choice   | 1=g<br>2=mg<br>3=ml<br>4=U<br>5=Piece/ #<br>6=U/kg.h<br>7=ug<br>8=MU<br>9=BU<br>10=%<br>11=Others<br>12=Not Recorded                   |                                   |
| Discharge Medication | 4-[4]Frequency of Medication | Single Choice   | 1=Qd /QN<br>2=Bid/q12h<br>3=Tid/q8h<br>4=Q6h<br>5=Once Every Other Day(qod)<br>6=When Necessary(sos/prn)<br>7=Others<br>8=Not Recorded |                                   |
| Discharge Medication | 5-[1]Discharge Medication5   | Drug Storehouse |                                                                                                                                        |                                   |
| Discharge Medication | 5-[2]Dosage                  | Input           |                                                                                                                                        |                                   |
| Discharge Medication | 5-[3]Unit                    | Single Choice   | 1=g<br>2=mg<br>3=ml<br>4=U<br>5=Piece/ #<br>6=U/kg.h<br>7=ug<br>8=MU<br>9=BU<br>10=%<br>11=Others<br>12=Not Recorded                   |                                   |
| Discharge Medication | 5-[5]Frequency of Medication | Single Choice   | 1=Qd /QN<br>2=Bid/q12h<br>3=Tid/q8h<br>4=Q6h<br>5=Once Every Other Day(qod)<br>6=When Necessary(sos/prn)<br>7=Others<br>8=Not Recorded |                                   |
| Discharge            | 6-[1]Discharge               | Drug            |                                                                                                                                        |                                   |

| Table Label          | Variables label              | Type            | Data Coding                                                                                                                            | Logical Requirements of Interface |
|----------------------|------------------------------|-----------------|----------------------------------------------------------------------------------------------------------------------------------------|-----------------------------------|
| Medication           | Medication6                  | Storehouse      |                                                                                                                                        |                                   |
| Discharge Medication | 6-[2]Dosage                  | Input           |                                                                                                                                        |                                   |
| Discharge Medication | 6-[3]Unit                    | Single Choice   | 1=g<br>2=mg<br>3=ml<br>4=U<br>5=Piece/ #<br>6=U/kg·h<br>7=ug<br>8=MU<br>9=BU<br>10=%<br>11=Others<br>12=Not Recorded                   |                                   |
| Discharge Medication | 6-[4]Frequency of Medication | Single Choice   | 1=Qd /QN<br>2=Bid/q12h<br>3=Tid/q8h<br>4=Q6h<br>5=Once Every Other Day(qod)<br>6=When Necessary(sos/prn)<br>7=Others<br>8=Not Recorded |                                   |
| Discharge Medication | 7-[1]Discharge Medication7   | Drug Storehouse |                                                                                                                                        |                                   |
| Discharge Medication | 7-[2]Dosage                  | Input           |                                                                                                                                        |                                   |
| Discharge Medication | 7-[3]Unit                    | Single Choice   | 1=g<br>2=mg<br>3=ml<br>4=U<br>5=Piece/ #<br>6=U/kg·h<br>7=ug<br>8=MU<br>9=BU<br>10=%<br>11=Others<br>12=Not Recorded                   |                                   |
| Discharge Medication | 7-[4]Frequency of Medication | Single Choice   | 1=Qd /QN<br>2=Bid/q12h<br>3=Tid/q8h<br>4=Q6h<br>5=Once Every Other Day(qod)<br>6=When Necessary(sos/prn)<br>7=Others<br>8=Not Recorded |                                   |
| Discharge Medication | 8-[1]Discharge Medication8   | Drug Storehouse |                                                                                                                                        |                                   |
| Discharge Medication | 8-[2]Dosage                  | Input           |                                                                                                                                        |                                   |
| Discharge Medication | 8-[3]Unit                    | Single Choice   | 1=g<br>2=mg                                                                                                                            |                                   |

| Table Label          | Variables label              | Type            | Data Coding                                                                                                                            | Logical Requirements of Interface |
|----------------------|------------------------------|-----------------|----------------------------------------------------------------------------------------------------------------------------------------|-----------------------------------|
|                      |                              |                 | 3=ml<br>4=U<br>5=Piece/ #<br>6=U/kg·h<br>7=ug<br>8=MU<br>9=BU<br>10=%<br>11=Others<br>12=Not Recorded                                  |                                   |
| Discharge Medication | 8-[4]Frequency of Medication | Single Choice   | 1=Qd /QN<br>2=Bid/q12h<br>3=Tid/q8h<br>4=Q6h<br>5=Once Every Other Day(qod)<br>6=When Necessary(sos/prn)<br>7=Others<br>8=Not Recorded |                                   |
| Discharge Medication | 9-[1]Discharge Medication9   | Drug Storehouse |                                                                                                                                        |                                   |
| Discharge Medication | 9-[2]Dosage                  | Input           |                                                                                                                                        |                                   |
| Discharge Medication | 9-[3]Unit                    | Single Choice   | 1=g<br>2=mg<br>3=ml<br>4=U<br>5=Piece/ #<br>6=U/kg·h<br>7=ug<br>8=MU<br>9=BU<br>10=%<br>11=Others<br>12=Not Recorded                   |                                   |
| Discharge Medication | 9-[4]Frequency of Medication | Single Choice   | 1=Qd /QN<br>2=Bid/q12h<br>3=Tid/q8h<br>4=Q6h<br>5=Once Every Other Day(qod)<br>6=When Necessary(sos/prn)<br>7=Others<br>8=Not Recorded |                                   |
| Discharge Medication | 10-[1]Discharge Medication10 | Drug Storehouse |                                                                                                                                        |                                   |
| Discharge Medication | 10-[2]Dosage                 | Input           |                                                                                                                                        |                                   |
| Discharge Medication | 10-[3]Unit                   | Single Choice   | 1=g<br>2=mg<br>3=ml<br>4=U<br>5=Piece/ #<br>6=U/kg·h<br>7=ug<br>8=MU<br>9=BU                                                           |                                   |

| Table Label          | Variables label               | Type            | Data Coding                                                                                                                            | Logical Requirements of Interface |
|----------------------|-------------------------------|-----------------|----------------------------------------------------------------------------------------------------------------------------------------|-----------------------------------|
|                      |                               |                 | 10=%<br>11=Others<br>12=Not Recorded                                                                                                   |                                   |
| Discharge Medication | 10-[4]Frequency of Medication | Single Choice   | 1=Qd /QN<br>2=Bid/q12h<br>3=Tid/q8h<br>4=Q6h<br>5=Once Every Other Day(qod)<br>6=When Necessary(sos/prn)<br>7=Others<br>8=Not Recorded |                                   |
| Discharge Medication | 11-[1]Discharge Medication11  | Drug Storehouse |                                                                                                                                        |                                   |
| Discharge Medication | 11-[2]Dosage                  | Input           |                                                                                                                                        |                                   |
| Discharge Medication | 11-[3]Unit                    | Single Choice   | 1=g<br>2=mg<br>3=ml<br>4=U<br>5=Piece/ #<br>6=U/kg.h<br>7=ug<br>8=MU<br>9=BU<br>10=%<br>11=Others<br>12=Not Recorded                   |                                   |
| Discharge Medication | 11-[4]Frequency of Medication | Single Choice   | 1=Qd /QN<br>2=Bid/q12h<br>3=Tid/q8h<br>4=Q6h<br>5=Once Every Other Day(qod)<br>6=When Necessary(sos/prn)<br>7=Others<br>8=Not Recorded |                                   |
| Discharge Medication | 12-[1]Discharge Medication12  | Drug Storehouse |                                                                                                                                        |                                   |
| Discharge Medication | 12-[2]Dosage                  | Input           |                                                                                                                                        |                                   |
| Discharge Medication | 12-[3]Unit                    | Single Choice   | 1=g<br>2=mg<br>3=ml<br>4=U<br>5=Piece/ #<br>6=U/kg.h<br>7=ug<br>8=MU<br>9=BU<br>10=%<br>11=Others<br>12=Not Recorded                   |                                   |
| Discharge Medication | 12-[4]Frequency of Medication | Single Choice   | 1=Qd /QN<br>2=Bid/q12h<br>3=Tid/q8h<br>4=Q6h                                                                                           |                                   |

| Table Label          | Variables label               | Type            | Data Coding                                                                                                                            | Logical Requirements of Interface |
|----------------------|-------------------------------|-----------------|----------------------------------------------------------------------------------------------------------------------------------------|-----------------------------------|
|                      |                               |                 | 5=Once Every Other Day(qod)<br>6=When Necessary(sos/prn)<br>7=Others<br>8=Not Recorded                                                 |                                   |
| Discharge Medication | 13-[1]Discharge Medication13  | Drug Storehouse |                                                                                                                                        |                                   |
| Discharge Medication | 13-[2]Dosage                  | Input           |                                                                                                                                        |                                   |
| Discharge Medication | 13-[3]Unit                    | Single Choice   | 1=g<br>2=mg<br>3=ml<br>4=U<br>5=Piece/ #<br>6=U/kg.h<br>7=ug<br>8=MU<br>9=BU<br>10=%<br>11=Others<br>12=Not Recorded                   |                                   |
| Discharge Medication | 13-[4]Frequency of Medication | Single Choice   | 1=Qd /QN<br>2=Bid/q12h<br>3=Tid/q8h<br>4=Q6h<br>5=Once Every Other Day(qod)<br>6=When Necessary(sos/prn)<br>7=Others<br>8=Not Recorded |                                   |
| Discharge Medication | 14-[1]Discharge Medication14  | Drug Storehouse |                                                                                                                                        |                                   |
| Discharge Medication | 14-[2]Dosage                  | Input           |                                                                                                                                        |                                   |
| Discharge Medication | 14-[3]Unit                    | Single Choice   | 1=g<br>2=mg<br>3=ml<br>4=U<br>5=Piece/ #<br>6=U/kg.h<br>7=ug<br>8=MU<br>9=BU<br>10=%<br>11=Others<br>12=Not Recorded                   |                                   |
| Discharge Medication | 14-[4]Frequency of Medication | Single Choice   | 1=Qd /QN<br>2=Bid/q12h<br>3=Tid/q8h<br>4=Q6h<br>5=Once Every Other Day(qod)<br>6=When Necessary(sos/prn)<br>7=Others<br>8=Not Recorded |                                   |
| Discharge            | 15-[1]Discharge               | Drug            |                                                                                                                                        |                                   |

| Table Label                      | Variables label                              | Type            | Data Coding                                                                                                                            | Logical Requirements of Interface                                                                                       |
|----------------------------------|----------------------------------------------|-----------------|----------------------------------------------------------------------------------------------------------------------------------------|-------------------------------------------------------------------------------------------------------------------------|
| Medication                       | Medication15                                 | Storehouse      |                                                                                                                                        |                                                                                                                         |
| Discharge Medication             | 15-[2]Dosage                                 | Input           |                                                                                                                                        |                                                                                                                         |
| Discharge Medication             | 15-[3]Unit                                   | Single Choice   | 1=g<br>2=mg<br>3=ml<br>4=U<br>5=Piece/ #<br>6=U/kg.h<br>7=ug<br>8=MU<br>9=BU<br>10=%<br>11=Others<br>12=Not Recorded                   |                                                                                                                         |
| Discharge Medication             | 15-[4]Frequency of Medication                | Single Choice   | 1=Qd /QN<br>2=Bid/q12h<br>3=Tid/q8h<br>4=Q6h<br>5=Once Every Other Day(qod)<br>6=When Necessary(sos/prn)<br>7=Others<br>8=Not Recorded |                                                                                                                         |
| Present Illness and Past History | History of Cardiovascular Disease            |                 |                                                                                                                                        |                                                                                                                         |
| Present Illness and Past History | 20.Prior angina                              | Single Choice   | 1=Not mentioned<br>2=Yes , stable angina pectoris<br>3=Yes , unstable angina pectoris<br>4=Yes , can not be classified                 | HPXJT=1 , other options can not be checked                                                                              |
| Present Illness and Past History | 21.Prior MI                                  | Single Choice   | 1=Not mentioned<br>2=Yes                                                                                                               | HPXG=1 , hide HPXGFS、HPXGFS1、HPXGFS2                                                                                    |
| Present Illness and Past History | 22.Date and time of the recent onset of MI.  | Calendar Format |                                                                                                                                        | HPXG=1 , hide HPXGFS、HPXGFS1、HPXGFS2 ;<br>HPXGFS=20000101 , HPXGFS1 is not null、HPXGFS<>20000101 , hide HPXGFS1、HPXGFS2 |
| Present Illness and Past History | 23.Site where the recent MI episode          | Input           |                                                                                                                                        | HPXGFS<>20000101 , hide HPXGFS1、HPXGFS2 ;<br>HPXGFS1=999 , hide HPXGFS2                                                 |
| Present Illness and Past History | 24.Time passed since the recent onset of MI. | Single Choice   | 1=XX year(s) ago<br>2=XX month(es) ago<br>3=XX week(s) ago<br>4=XX day(s) ago<br>5=XX hour(s) ago                                      | HPXGFS1=999 , hide HPXGFS2                                                                                              |
| Present Illness and              | 25.Previous History of Congestive Heart      | Single Choice   | 1=Not mentioned<br>2=Yes                                                                                                               | HPCXX=1 , hide HPCXXD、                                                                                                  |



| Table Label                      | Variables label                             | Type            | Data Coding                                                                                       | Logical Requirements of Interface                                                                                                  |
|----------------------------------|---------------------------------------------|-----------------|---------------------------------------------------------------------------------------------------|------------------------------------------------------------------------------------------------------------------------------------|
| Past History                     | Failure                                     |                 |                                                                                                   | HPCXXD1、HPCXXD2 ;                                                                                                                  |
| Present Illness and Past History | 26.Date and time of the recent onset of HF  | Calendar Format |                                                                                                   | HPCXX=1 , hide HPCXXD、<br>HPCXXD1、HPCXXD2 ;<br>HPCXXD=20000101、HPCXXD1 is not null; HPCXXD<>20000101, hide HPCXXD1、HPCXXD2         |
| Present Illness and Past History | 27.Site where the recent MI episode         | Input           |                                                                                                   | HPCXXD<>20000101, hide HPCXXD1、HPCXXD2 ;<br>HPCXXD1=999 , hide HPCXXD2                                                             |
| Present Illness and Past History | 28.Time passed since the recent onset of HF | Single Choice   | 1=XX year(s) ago<br>2=XX month(es) ago<br>3=XX week(s) ago<br>4=XX day(s) ago<br>5=XX hour(s) ago | HPCXXD1=999 , hide HPCXXD2                                                                                                         |
| Present Illness and Past History | 29.Prior PCI                                | Single Choice   | 1=Not mentioned<br>2=Yes                                                                          | HPPCI=1 , hide HPPCID、<br>HPPCID1、HPPCID2                                                                                          |
| Present Illness and Past History | 30.Date of Prior PCI                        | Calendar Format |                                                                                                   | HPPCI=1 , hide HPPCID、<br>HPPCID1、HPPCID2 ;<br>HPPCID=20000101、HPCXXD1 is not null;HPPCID<>20000101,hide HPPCID1、HPPCID2 ;         |
| Present Illness and Past History | 31.Site of Prior PCI                        | Input           |                                                                                                   | HPPCID<>20000101,hide HPPCID1、HPPCID2 ;<br>HPPCID1=999 , hide HPCXXD2                                                              |
| Present Illness and Past History | Time Passed since Prior PCI                 | Single Choice   | 1=XX year(s) ago<br>2=XX month(es) ago<br>3=XX week(s) ago<br>4=XX day(s) ago<br>5=XX hour(s) ago | HPPCID1=999 , hide HPCXXD2                                                                                                         |
| Present Illness and Past History | 33.Prior CABG                               | Single Choice   | 1=Not mentioned<br>2=Yes                                                                          | HCABG=1 , hide HCABGD、<br>HCABGD1、HCABGD2                                                                                          |
| Present Illness and Past History | 34.Date of Prior CABG                       | Calendar Format |                                                                                                   | HPCABG=1 , hide HPCABGD、<br>HPCABGD1、HPCABGD2 ;<br>HPCABGD=20000101、HPCABGD1 is not null;HCABGD<>20000101,hide HPCABGD1、HPCABGD2 ; |
| Present Illness and Past History | 35.Site of Prior CABG                       | Input           |                                                                                                   | HPCABGD<>20000101,hide HPCABGD1、HPCABGD2 ;<br>HPCABGD1=999 , hide HPCABGD2                                                         |
| Present Illness and Past History | 36.Time Passed since Prior PCI              | Single Choice   | 1=XX year(s) ago<br>2=XX month(es) ago<br>3=XX week(s) ago<br>4=XX day(s) ago<br>5=XX hour(s) ago | HPCABGD1=999 , hide HPCABGD2                                                                                                       |
| Present Illness and              | 37.Prior Valvular Surgery                   | Single Choice   | 1=Not mentioned<br>2=Yes                                                                          | HPBM=1 , hide HPBMZD、                                                                                                              |

| Table Label                      | Variables label                                          | Type             | Data Coding                                                                                       | Logical Requirements of Interface                                                   |
|----------------------------------|----------------------------------------------------------|------------------|---------------------------------------------------------------------------------------------------|-------------------------------------------------------------------------------------|
| Past History                     |                                                          |                  |                                                                                                   | HPBMEJ, HPBMSJ, HPBMD, HPBMD1, HPBMD2                                               |
| Present Illness and Past History | 38.Aortic Valve                                          | Single Choice    | 1=Mechanical valve<br>2=Biologic valve<br>3=Valvuloplasty<br>4=Unknown                            | HPBM=2 and HPBMZD is not null<br>HPBMZD=4 , other options can not be checked        |
| Present Illness and Past History | 39.Mitral Valve                                          | Single Choice    | 1=Mechanical valve<br>2=Biologic valve<br>3=Valvuloplasty<br>4=Unknown                            | HPBM=2 and HPBMEJ is not null<br>HPBMEJ=4 , other options can not be checked        |
| Present Illness and Past History | 40.Tricuspid Valve                                       | Single Choice    | 1=Mechanical valve<br>2=Biologic valve<br>3=Valvuloplasty<br>4=Unknown                            | HPBM=2 and HPBMSJ is not null<br>HPBMSJ=4 , other options can not be checked        |
| Present Illness and Past History | 41.Date of Prior Valvular Surgery                        | Calendar Format  |                                                                                                   | HPBMD=20000101, HPBMD1 is not null;HPBMD<>20000101,hide HPBMD1, HPBMD2 ;            |
| Present Illness and Past History | 42.Site of Prior Valvular Surgery                        | Input            |                                                                                                   | HPBMD<>20000101,hide HPBMD1, HPBMD2 ; HPBMD1=999 , hide HPBMD2                      |
| Present Illness and Past History | 43.Time Passed since Prior Valvular Surgery              | Single Choice    | 1=XX year(s) ago<br>2=XX month(es) ago<br>3=XX week(s) ago<br>4=XX day(s) ago<br>5=XX hour(s) ago | HPBMD1=999 , hide HPBMD2                                                            |
| Present Illness and Past History | 44.Prior Arrhythmia                                      | Single Choice    | 1=Not mentioned<br>2=Yes                                                                          | HPXL=1 , hide HPXLL, HPXLLQ, HPXLLQD, HPXLLQD1, HPXLLQD2                            |
| Present Illness and Past History | 45.Type of Arrhythmia                                    |                  |                                                                                                   |                                                                                     |
| Present Illness and Past History | 45-[1]Atrial Flutter /Atrial Fibrillation                | Multiple Choices | 1                                                                                                 |                                                                                     |
| Present Illness and Past History | 45-[2]III °AV Block                                      | Multiple Choices | 1                                                                                                 |                                                                                     |
| Present Illness and Past History | 45-[3]Ventricular Tachycardia / Ventricular Fibrillation | Multiple Choices | 1                                                                                                 |                                                                                     |
| Present Illness and Past History | 45-[4]Others(Detailed Description)                       | Multiple Choices | 1                                                                                                 |                                                                                     |
| Present Illness and Past History | 46.Others(Detailed Description)                          | Input            |                                                                                                   | HPXLL=4 , HPXLLQ is not null                                                        |
| Present Illness and Past History | 47.Date of Prior Arrhythmia                              | Calendar Format  |                                                                                                   | HPXLLQD=20000101, HPXLLQD1 is not null;HPXLLQD<>20000101, hide HPXLLQD1, HPXLLQD2 ; |
| Present Illness and              | 48.Site of of Prior Arrhythmia                           | Input            |                                                                                                   | HPXLLQD1<>20000101, hide HPXLLQD1, HPXLLQD2 ;                                       |

| Table Label                      | Variables label                                                                                                                                                                                                                                       | Type            | Data Coding                                                                                                                                                                                                          | Logical Requirements of Interface                                      |
|----------------------------------|-------------------------------------------------------------------------------------------------------------------------------------------------------------------------------------------------------------------------------------------------------|-----------------|----------------------------------------------------------------------------------------------------------------------------------------------------------------------------------------------------------------------|------------------------------------------------------------------------|
| Past History                     |                                                                                                                                                                                                                                                       |                 |                                                                                                                                                                                                                      | HPXLLQD1=999 or continual , hide HPXLLQD2                              |
| Present Illness and Past History | 49.Time Passed since Prior Arrhythmia                                                                                                                                                                                                                 | Single Choice   | 1=XX year(s) ago<br>2=XX month(es) ago<br>3=XX week(s) ago<br>4=XX day(s) ago<br>5=XX hour(s) ago                                                                                                                    | HPXLLQD1=99999 or continual , hide HPXLLQD2                            |
| Present Illness and Past History | 50.Electrophysiological Devices( Pacemakers, Implantable Automatic Defibrillators ICD, Cardiac Resynchronization Therapy CRT, or Cardiac Synchronization Therapy Combined With Implantable Automatic Defibrillators CRT-D, Implantable Loop Recorder) | Single Choice   | 1=Not mentioned<br>2=Yes                                                                                                                                                                                             | HPDSL=1 , hide HPDSL, HPDSL, HPDSL, HPDSL                              |
| Present Illness and Past History | 51.Type of Electrophysiological Devices                                                                                                                                                                                                               | Single Choice   | 1=Single chamber pacing<br>2=Dual-chamber pacing<br>3=Biventricular pacing<br>4=Pacemaker of unknown type<br>5=Automatic implantable cardioverter defibrillator (AICD)<br>6=Other types of Electrophysiology devices | HPDSL=2 and HPDSL is not null                                          |
| Present Illness and Past History | 51-[7]Other Type of Electrophysiological Devices                                                                                                                                                                                                      | Input           |                                                                                                                                                                                                                      |                                                                        |
| Present Illness and Past History | 52.Date and Time of the recent equipment of Electrophysiological Devices                                                                                                                                                                              | Calendar Format |                                                                                                                                                                                                                      | HPDSL=20000101, HPDSL is not null;HPDSL<>20000101, hide HPDSL, HPDSL ; |
| Present Illness and Past History | 53.Site of the recent equipment of Electrophysiological Devices                                                                                                                                                                                       | Input           |                                                                                                                                                                                                                      | HPDSL<>20000101, hideHPDSL, HPDSL ; HPDSL=999 , hide HPDSL             |
| Present Illness and Past History | 54.Time Passed Since the recent equipment of Electrophysiological Devices                                                                                                                                                                             | Single Choice   | 1=XX year(s) ago<br>2=XX month(es) ago<br>3=XX week(s) ago<br>4=XX day(s) ago<br>5=XX hour(s) ago                                                                                                                    | HPDSL=999 , hide HPDSL                                                 |
| Present Illness and Past History | 55.Ischemic stroke(Cerebral Infarction、 Ischemic Stroke、 Cerebral Thrombosis)                                                                                                                                                                         | Single Choice   | 1=Not mentioned<br>2=Yes                                                                                                                                                                                             | HPQZ =1 , hide HPQZ, HPQZ, HPQZ                                        |

| Table Label                      | Variables label                                                                                                      | Type            | Data Coding                                                                                       | Logical Requirements of Interface                                            |
|----------------------------------|----------------------------------------------------------------------------------------------------------------------|-----------------|---------------------------------------------------------------------------------------------------|------------------------------------------------------------------------------|
| Present Illness and Past History | 56..Date and Time of the Recent Onset of Ischemic Stroke                                                             | Calendar Format |                                                                                                   | HPQCZD=20000101、HPQCZD1 is not null;HPQCZD<>20000101, hide HPQCZD1、HPQCZD2 ; |
| Present Illness and Past History | 57.Site of the Recent Onset of Ischemic Stroke                                                                       | Input           |                                                                                                   | HPQCZD<>20000101, hide HPQCZD1、HPQCZD2 ;<br>HPQCZD1=999 , hide HPQCZD2       |
| Present Illness and Past History | 58.Time Passed since the Recent Onset of Ischemic Stroke                                                             | Single Choice   | 1=XX year(s) ago<br>2=XX month(es) ago<br>3=XX week(s) ago<br>4=XX day(s) ago<br>5=XX hour(s) ago | HPQCZD1=999 , hide HPQCZD2                                                   |
| Present Illness and Past History | 59.Hemorrhagic Stroke(Cerebral Hemorrhage、Subarachnoid Hemorrhage、Cerebral Artery Rupture、Cerebral Aneurysm Rupture) | Single Choice   | 1=Not mentioned<br>2=Yes                                                                          | HPCCZ =1 , hide HPCCZD、HPCCZD1、HPCCZD2                                       |
| Present Illness and Past History | 56..Date and Time of the Recent Onset of Hemorrhagic Stroke                                                          | Calendar Format |                                                                                                   | HPCCZD=20000101、HPCCZD1 is not null;HPCCZD<>20000101, hide HPCCZD1、HPCCZD2 ; |
| Present Illness and Past History | 57.Site of the Recent Onset of Hemorrhagic Stroke                                                                    | Input           |                                                                                                   | HPCCZD<>20000101, hide HPCCZD1、HPCCZD2 ;<br>HPCCZD1=999 , hide HPCCZD2       |
| Present Illness and Past History | 58.Time Passed since the Recent Onset of Hemorrhagic Stroke                                                          | Single Choice   | 1=XX year(s) ago<br>2=XX month(es) ago<br>3=XX week(s) ago<br>4=XX day(s) ago<br>5=XX hour(s) ago | HPCCZD1=999 , hide HPCCZD2                                                   |
| Present Illness and Past History | 63.Transient Ischemic Attack, TIA                                                                                    | Single Choice   | 1=Not mentioned<br>2=Yes                                                                          | HPTIA =1 , hide HPTIAD、HPTIAD1、HPTIAD2                                       |
| Present Illness and Past History | 56..Date and Time of the Recent Onset of TIA                                                                         | Calendar Format |                                                                                                   | HPTIAD=20000101、HPTIAD1 is not null;HPTIAD<>20000101,hide HPTIAD1、HPTIAD2 ;  |
| Present Illness and Past History | 57.Site of the Recent Onset of TIA                                                                                   | Input           |                                                                                                   | HPTIAD<>20000101, hide HPTIAD1、HPTIAD2 ;<br>HPTIAD1=999 , hide HPTIAD2       |
| Present Illness and Past History | 58.Time Passed since the Recent Onset of TIA                                                                         | Single Choice   | 1=XX year(s) ago<br>2=XX month(es) ago<br>3=XX week(s) ago<br>4=XX day(s) ago<br>5=XX hour(s) ago | HPTIAD1=999 , hide HPTIAD2                                                   |
| Present Illness and Past History | 67.Peripheral Arterial Disease, PAD (Intermittent Claudication, Angioplasty, Peripheral Vessels Bypass               | Single Choice   | 1=Not mentioned<br>2=Yes                                                                          |                                                                              |

| Table Label                      | Variables label                                  | Type             | Data Coding                   | Logical Requirements of Interface                                                             |
|----------------------------------|--------------------------------------------------|------------------|-------------------------------|-----------------------------------------------------------------------------------------------|
|                                  | Grafting)                                        |                  |                               |                                                                                               |
| Present Illness and Past History | Risk Factors                                     |                  |                               |                                                                                               |
| Present Illness and Past History | 68.Diabetes                                      | Single Choice    | 1=Not mentioned<br>2=Yes      | HPTNB=1 , hide HPTNBL,<br>HPTNSD , HPTNSDQ,<br>HPTNSD1、 HPTNSD2、<br>HPTNSD3、 HPTNSD4、 HPTNSD5 |
| Present Illness and Past History | 69.Type of Diabetes                              | Single Choice    | 1=T1DM<br>2=T2DM<br>3=Unknown | HPTNB=2 and HPTNBL is not null                                                                |
| Present Illness and Past History | 70.Diabetes Control                              |                  |                               |                                                                                               |
| Present Illness and Past History | 70-[1]Diabetes Control-Unknown                   | Multiple Choices | 1                             | HPTNSD=1, no valuation in other items                                                         |
| Present Illness and Past History | 70-[2]Diabetes Control-No Treatment for Diabetes | Multiple Choices | 1                             | HPTNSD1=1, no valuation in other items                                                        |
| Present Illness and Past History | 70-[3]Diabetes Control-Diet only                 | Multiple Choices | 1                             |                                                                                               |
| Present Illness and Past History | 70-[4]Diabetes Control-Oral Agent                | Multiple Choices | 1                             |                                                                                               |
| Present Illness and Past History | 70-[5]Diabetes Control-Insulin                   | Multiple Choices | 1                             |                                                                                               |
| Present Illness and Past History | 70-[6]Diabetes Control-Others                    | Multiple Choices | 1                             | HPTNSD5=1 and HPTNSDQ is not null                                                             |
| Present Illness and Past History | 70-[7]Others                                     | Input            |                               | HPTNSD=1 or 2 or 3 or 4 or 5 , hide HPTNSDQ<br>HPTNSD=6 and HPTNSDQ is not null               |
| Present Illness and Past History | 80.Hypertension                                  | Single Choice    | 1=Not mentioned<br>2=Yes      | HPGXY=1 , hide HPGXYZL,<br>HPGXYZL1、 HPGXYZL2、<br>HPGXYZL3、 HPGXYZL4                          |
| Present Illness and Past History | 81.Hypertension Control                          |                  |                               |                                                                                               |
| Present Illness and Past History | 81-[1]Hypertension Control-Unknown               | Multiple Choices | 1                             | HPGXYZL=1,no valuation in other items                                                         |
| Present Illness and Past History | 81-[2]Hypertension Control-No Treatment          | Multiple Choices | 1                             | HPGXYZL1=1, no valuation in other items                                                       |
| Present Illness and Past History | 81-[3]Hypertension Control-Life Style Changing   | Multiple Choices | 1                             |                                                                                               |
| Present Illness and Past History | 81-[4]Hypertension Control- Drugs                | Multiple Choices | 1                             |                                                                                               |
| Present Illness and              | 82.History of Dyslipidemia                       | Single Choice    | 1=Not mentioned<br>2=Yes      | HPXZYC=1 , hide HPXZYCZ                                                                       |

| Table Label                      | Variables label                                   | Type             | Data Coding                                                                       | Logical Requirements of Interface                              |
|----------------------------------|---------------------------------------------------|------------------|-----------------------------------------------------------------------------------|----------------------------------------------------------------|
| Past History                     |                                                   |                  |                                                                                   |                                                                |
| Present Illness and Past History | 83.Dyslipidemia Treatment                         |                  |                                                                                   |                                                                |
| Present Illness and Past History | 83-[1]Dyslipidemia Treatment-Unknown              | Multiple Choices | 1                                                                                 | HPXZYZCZ=1, no valuation in other items                        |
| Present Illness and Past History | 83-[2]Dyslipidemia Treatment-No Treatment         | Multiple Choices | 1                                                                                 | HPXZYZCZ1=1, no valuation in other items                       |
| Present Illness and Past History | 83-[3]Dyslipidemia Treatment-Life Style Changing  | Multiple Choices | 1                                                                                 |                                                                |
| Present Illness and Past History | 83-[4]Dyslipidemia Treatment-Lipid-Lowering Agent | Multiple Choices | 1                                                                                 |                                                                |
| Present Illness and Past History | 84.History of Non-Cardiac Disease                 |                  |                                                                                   |                                                                |
| Present Illness and Past History | 84-[1]Chronic Renal Failure                       | Single Choice    | 1=Not mentioned<br>2=Yes , treated by dialysis<br>3=Yes , not treated by dialysis |                                                                |
| Present Illness and Past History | 84-[2]Chronic Liver Disease                       | Single Choice    | 1=Not mentioned<br>2=Yes                                                          |                                                                |
| Present Illness and Past History | 84-[3]COPD                                        | Single Choice    | 1=Not mentioned<br>2=Yes                                                          |                                                                |
| Present Illness and Past History | 84-[4]Sleep Apnea                                 | Single Choice    | 1=Not mentioned<br>2=Yes                                                          |                                                                |
| Present Illness and Past History | 84-[5]Venous Thrombosis Disease                   | Single Choice    | 1=Not mentioned<br>2=Yes                                                          | HPJMSS=1 , hide HPJMSS1                                        |
| Present Illness and Past History | 84-[6]If Yes , Please Choose An Option :          | Single Choice    | 1=Deep venous thrombosis<br>2=Pulmonary embolism<br>3=Unknown                     | HPJMSS=2 and HPJMSS1 is not null                               |
| Present Illness and Past History | 84-[7]Immunity Disease                            | Single Choice    | 1=Not mentioned<br>2=Yes                                                          |                                                                |
| Present Illness and Past History | 84-[8]Thyroid Disease                             | Single Choice    | 1=Not mentioned<br>2=Yes                                                          | HPJZX=1 , hide HPJZX1、HPJZXQ                                   |
| Present Illness and Past History | 84-[9]If Yes , Please Choose An Option :          | Single Choice    | 1=Hypothyroidism<br>2=Hyperthyroidism<br>3=Others                                 | HPJZX=2 and HPJZX1 is not null                                 |
| Present Illness and Past History | 84-[10]Others:                                    | Input            |                                                                                   | HPJZX1=1 or 2 , hide HPJZXQ<br>HPJZX1=3 and HPJZXQ is not null |
| Present Illness and Past History | 85.Contraindications May Exist                    |                  |                                                                                   |                                                                |
| Present Illness and Past History | 85-[1]Active Bleeding                             | Single Choice    | 1=Not mentioned<br>2=Yes                                                          |                                                                |

| Table Label                      | Variables label                             | Type            | Data Coding                                | Logical Requirements of Interface                  |
|----------------------------------|---------------------------------------------|-----------------|--------------------------------------------|----------------------------------------------------|
| Present Illness and Past History | 85-[2]Gastric Ulcer                         | Single Choice   | 1=Not mentioned<br>2=Yes                   |                                                    |
| Present Illness and Past History | 85-[3] Intracranial Mass                    | Single Choice   | 1=Not mentioned<br>2=Yes                   |                                                    |
| Present Illness and Past History | 85-[4]Suspected/Diagnosed Aortic Dissection | Single Choice   | 1=Not mentioned<br>2=Yes                   |                                                    |
| Present Illness and Past History | 85-[5]Surgery(Cardiac Surgery Excluded)     | Single Choice   | 1=Not mentioned<br>2=Yes                   |                                                    |
| Present Illness and Past History | 85-[6]Pregnancy                             | Single Choice   | 1=Not mentioned<br>2=Yes                   |                                                    |
| Present Illness and Past History | 85-[7]Trauma                                | Single Choice   | 1=Not mentioned<br>2=Yes                   |                                                    |
| Present Illness and Past History | 85-[8]History of Asthma                     | Single Choice   | 1=Not mentioned<br>2=Yes                   |                                                    |
| Present Illness and Past History | Drug Use Before Admission                   |                 |                                            | If drug end with 999, hide the following variables |
| Present Illness and Past History | 86-[1]                                      | Drug Storehouse |                                            |                                                    |
| Present Illness and Past History | 86-[2]                                      | Drug Storehouse |                                            |                                                    |
| Present Illness and Past History | 86-[3]                                      | Drug Storehouse |                                            |                                                    |
| Present Illness and Past History | 86-[4]                                      | Drug Storehouse |                                            |                                                    |
| Present Illness and Past History | 86-[5]                                      | Drug Storehouse |                                            |                                                    |
| Present Illness and Past History | 86-[6]                                      | Drug Storehouse |                                            |                                                    |
| Present Illness and Past History | 86-[7]                                      | Drug Storehouse |                                            |                                                    |
| Present Illness and Past History | 86-[8]                                      | Drug Storehouse |                                            |                                                    |
| Present Illness and Past History | 86-[9]                                      | Drug Storehouse |                                            |                                                    |
| Present Illness and Past History | 86-[10]                                     | Drug Storehouse |                                            |                                                    |
| Personal and family History      | Personal History                            |                 |                                            |                                                    |
| Personal and family History      | 87. Smoking History                         | Single Choice   | 1=Never<br>2=Over 1 year<br>3=Over 1 month | PFHXY=1 or 6 , hide PFHYJY , PFHXYS , PFHMR ;      |

| Table Label                 | Variables label                                  | Type             | Data Coding                                                                                       | Logical Requirements of Interface                  |
|-----------------------------|--------------------------------------------------|------------------|---------------------------------------------------------------------------------------------------|----------------------------------------------------|
|                             |                                                  |                  | but less then 1 year<br>4= Former smoker(quit time unknown)<br>5=Current smoker<br>6=Not recorded | PFHXY=4 or 5 , hide PFHYJY ;                       |
| Personal and family History | 88.Time of Smoking Cessation(Month)              | Input            |                                                                                                   | PFHXY=2 and PFHYJY is not null                     |
| Personal and family History | 89.Smoking History(Month)                        | Input            |                                                                                                   | PFHXY=2 or 3 or 4 or 5 and PFHXYS is not null      |
| Personal and family History | 90.Cigarette Consumption Per Day                 | Input            |                                                                                                   | PFHXY=2 or 3 or 4 or 5and PFHMR is not null        |
| Personal and family History | 91.History of Allergy and Adverse Event of Drugs |                  |                                                                                                   |                                                    |
| Personal and family History | 91-[1]                                           | Input            |                                                                                                   | If drug end with 999, hide the following variables |
| Personal and family History | 91-[2]                                           | Input            |                                                                                                   |                                                    |
| Personal and family History | 91-[3]                                           | Input            |                                                                                                   |                                                    |
| Personal and family History | 92.Family History                                |                  |                                                                                                   |                                                    |
| Personal and family History | 92-[1]CHD                                        | Single Choice    | 1=Not mentioned<br>2=Yes                                                                          |                                                    |
| Personal and family History | 92-[2]Cerebrovascular Accident                   | Single Choice    | 1=Not mentioned<br>2=Yes                                                                          |                                                    |
| Personal and family History | 92-[3]Hypertension                               | Single Choice    | 1=Not mentioned<br>2=Yes                                                                          |                                                    |
| Personal and family History | 92-[4]Diabetes                                   | Single Choice    | 1=Not mentioned<br>2=Yes                                                                          |                                                    |
| Personal and family History | 92-[5]Dyslipidemia                               | Single Choice    | 1=Not mentioned<br>2=Yes                                                                          |                                                    |
| physical Examination        | 1.Body Temperature(°C)                           | Input            |                                                                                                   |                                                    |
| physical Examination        | 2.Heart Rate(/min)                               | Input            |                                                                                                   |                                                    |
| physical Examination        | 3.Respiratory Rate(/min)                         | Input            |                                                                                                   |                                                    |
| physical Examination        | 4.Systolic Pressure(mmHg)                        | Input            |                                                                                                   |                                                    |
| physical Examination        | 5.Diastolic Pressure(mmHg)                       | Input            |                                                                                                   |                                                    |
| Progress Notes              | 1.In-hospital Event                              |                  |                                                                                                   |                                                    |
| Progress Notes              | 1-[1]Recurrent MI                                | Multiple Choices | 1                                                                                                 |                                                    |



| Table Label    | Variables label                                   | Type             | Data Coding | Logical Requirements of Interface |
|----------------|---------------------------------------------------|------------------|-------------|-----------------------------------|
| Progress Notes | 1-[2]Recurrent Angina Pectoris                    | Multiple Choices | 1           |                                   |
| Progress Notes | 5-[3]Rupture of the Free Wall of Heart            | Multiple Choices | 1           |                                   |
| Progress Notes | 1-[4]Rupture of papillary muscle                  | Multiple Choices | 1           |                                   |
| Progress Notes | 1-[5]Ventricular Septal Rupture                   | Multiple Choices | 1           |                                   |
| Progress Notes | 1-[6]Cardiac Tamponade                            | Multiple Choices | 1           |                                   |
| Progress Notes | 1-[7]Pericardial Effusion                         | Multiple Choices | 1           |                                   |
| Progress Notes | 1-[8]Cardiac Shock                                | Multiple Choices | 1           |                                   |
| Progress Notes | 1-[9]Cardiac Arrest                               | Multiple Choices | 1           |                                   |
| Progress Notes | 1-[10]CPR                                         | Multiple Choices | 1           |                                   |
| Progress Notes | 1-[11]Atrial Fibrillation/Atrial Flutter          | Multiple Choices | 1           |                                   |
| Progress Notes | 1-[12]Ventricular Tachycardia                     | Multiple Choices | 1           |                                   |
| Progress Notes | 1-[13]Ventricular Fibrillation                    | Multiple Choices | 1           |                                   |
| Progress Notes | 1-[14]Acute Heart Failure                         | Multiple Choices | 1           |                                   |
| Progress Notes | 1-[15]Acute Exacerbation of Chronic Heart Failure | Multiple Choices | 1           |                                   |
| Progress Notes | 1-[16]Heart Failure(Undetermined)                 | Multiple Choices | 1           |                                   |
| Progress Notes | 1-[17]Acute Pulmonary Edema                       | Multiple Choices | 1           |                                   |
| Progress Notes | 1-[18]Respiratory Failure                         | Multiple Choices | 1           |                                   |
| Progress Notes | 1-[19]Gastrointestinal Bleeding                   | Multiple Choices | 1           |                                   |
| Progress Notes | 1-[20]Urogenital Bleeding                         | Multiple Choices | 1           |                                   |
| Progress Notes | 1-[21] Intracranial /Subdural Hemorrhage          | Multiple Choices | 1           |                                   |
| Progress Notes | 1-[22]Retroperitoneal Hemorrhage                  | Multiple Choices | 1           |                                   |
| Progress Notes | 1-[23]Bleeding/Hematoma in Puncture Site          | Multiple Choices | 1           |                                   |
| Progress Notes | 1-[24]Pericardial Bleeding                        | Multiple Choices | 1           |                                   |
| Progress Notes | 1-[25]Bleeding(Position is not Indicated)         | Multiple Choices | 1           |                                   |
| Progress Notes | 1-[26]Hemorrhagic Shock                           | Multiple Choices | 1           |                                   |
| Progress Notes | 1-[27]Venous Thromboembolism                      | Multiple Choices | 1           |                                   |
| Progress Notes | 1-[28]Pulmonary Embolism                          | Multiple Choices | 1           |                                   |
| Progress Notes | 1-[29]Deep Venous Thrombosis                      | Multiple Choices | 1           |                                   |
| Progress Notes | 1-[30]Acute Ischemic Stroke(Cerebral              | Multiple Choices | 1           |                                   |

| Table Label    | Variables label                                                              | Type             | Data Coding                                                                              | Logical Requirements of Interface                                   |
|----------------|------------------------------------------------------------------------------|------------------|------------------------------------------------------------------------------------------|---------------------------------------------------------------------|
|                | Infarction/Cerebral Embolism /Cerebral Thrombosis/TIA)                       |                  |                                                                                          |                                                                     |
| Progress Notes | 1-[31]Acute Hemorrhagic Stroke (Cerebral Hemorrhage/ Subarachnoid Hemorrhage | Multiple Choices | 1                                                                                        |                                                                     |
| Progress Notes | 1-[32]Acute Stroke (Undetermined)                                            | Multiple Choices | 1                                                                                        |                                                                     |
| Progress Notes | 1-[33]Acute Renal Failure                                                    | Multiple Choices | 1                                                                                        |                                                                     |
| Progress Notes | 1-[34]Dialysis(Peritoneal Dialysis/Hemodialysis)                             | Multiple Choices | 1                                                                                        |                                                                     |
| Progress Notes | 1-[35]Adverse Contrast media reaction(Including Serious Allergy)             | Multiple Choices | 1                                                                                        |                                                                     |
| Progress Notes | 1-[36]Contrast Induced Nephropathy(CIN)                                      | Multiple Choices | 1                                                                                        |                                                                     |
| Progress Notes | 1-[37]Thrombocytopenia                                                       | Multiple Choices | 1                                                                                        |                                                                     |
| Progress Notes | 1-[38]Infection(Nosocomial Infection)                                        | Multiple Choices | 1                                                                                        |                                                                     |
| Progress Notes | 1-[39]None of Above                                                          | Multiple Choices | 1                                                                                        |                                                                     |
| Progress Notes | 2.Consultation of Cardiac Surgery After PCI                                  | Single Choice    | 1=Yes<br>2=No<br>3=Not recorded                                                          |                                                                     |
| Progress Notes | 3.Doctor Suggestion After PCI                                                |                  |                                                                                          |                                                                     |
| Progress Notes | 3-[1]No Suggestion                                                           | Multiple Choices | 1                                                                                        | BCGZJY1=1 , no valuation in other items                             |
| Progress Notes | 3-[2]Medication                                                              | Multiple Choices | 1                                                                                        |                                                                     |
| Progress Notes | 3-[3]PCI                                                                     | Multiple Choices | 1                                                                                        |                                                                     |
| Progress Notes | 3-[4]CABG                                                                    | Multiple Choices | 1                                                                                        |                                                                     |
| Progress Notes | 3-[5]Heart Transplantation                                                   | Multiple Choices | 1                                                                                        |                                                                     |
| Progress Notes | 3-[6]Hybrid Surgery                                                          | Multiple Choices | 1                                                                                        |                                                                     |
| Progress Notes | 3-[7]Other Cardiac Surgery/Procedure(Non-PCI or CABG)                        | Multiple Choices | 1                                                                                        |                                                                     |
| Progress Notes | 3-[8]Revascularization                                                       | Multiple Choices | 1                                                                                        |                                                                     |
| Progress Notes | 4.PCI Was Refused by Patient ?                                               | Single Choice    | 1=Yes<br>2=No<br>3=Not recorded                                                          | BCJJPCI=2 or 3,hide BCJJPCIR ;<br>BCJJPCI=1 , BCJJPCIR is not null  |
| Progress Notes | 5.The Reason of PCI Refusal ?                                                | Single Choice    | 1=For Economic Reasons<br>2=For Operation Risks<br>3=Transferring to Other Hospitals for | BCJJPCI=2 or 3, hide BCJJPCIR ;<br>BCJJPCI=1 , BCJJPCIR is not null |

| Table Label    | Variables label                         | Type          | Data Coding                                                                                                                                                                                                                                                                                                                  | Logical Requirements of Interface                                |
|----------------|-----------------------------------------|---------------|------------------------------------------------------------------------------------------------------------------------------------------------------------------------------------------------------------------------------------------------------------------------------------------------------------------------------|------------------------------------------------------------------|
|                |                                         |               | CABG<br>4=Others<br>5=Not Recorded                                                                                                                                                                                                                                                                                           |                                                                  |
| Progress Notes | 6.CABG Was Refused by Patient ?         | Single Choice | 1=Yes<br>2=No<br>3=Not recorded                                                                                                                                                                                                                                                                                              | BCJJCA=2 or 3, hide BCJJPCIR ;<br>BCJJCA=1 , BCJJCAR is not null |
| Progress Notes | 7.The Reason of CABG Refusal ?          | Single Choice | 1=For Economic Reasons<br>2=For Operation Risks<br>3=Transferring to Other Hospitals for PCI<br>4=Others<br>5=Not Recorded                                                                                                                                                                                                   | BCJJCA=2 or 3, hide BCJJPCIR ;<br>BCJJCA=1 , BCJJCAR is not null |
| Progress Notes | Drug Contraindications                  |               |                                                                                                                                                                                                                                                                                                                              |                                                                  |
| Progress Notes | 8.Drug Contraindications-1              | Input         |                                                                                                                                                                                                                                                                                                                              | BCYWJ01=999 , hide question 9-16                                 |
| Progress Notes | 9..The Reason of Drug Not Prescription  | Single Choice | 0=Not recored<br>1=Allergy / Intolerance<br>2=Refused by the patient<br>3=Active bleeding<br>4=Bradycardia even without $\beta$ -blockers(heart beat <60 bpm)<br>5=II/III-degree AV blocks<br>6=Systolic pressure<90mmHg<br>7=Moderate to severe arotic stenosis<br>8=Renal failure<br>9=Other reasons(Detailed Description) | BCYWJ02=9 , BCYWJ03 is not null                                  |
| Progress Notes | 10.Other Reasons                        | Input         |                                                                                                                                                                                                                                                                                                                              | BCYWJ02=9 , BCYWJ03 is not null                                  |
| Progress Notes | 11.Drug Contraindications-2             | Input         |                                                                                                                                                                                                                                                                                                                              | BCYWJ04=999, hide question 12-16                                 |
| Progress Notes | 12..The Reason of Drug Not Prescription | Single Choice | 0=Not recored<br>1=Allergy / Intolerance<br>2=Refused by the patient<br>3=Active bleeding<br>4=Bradycardia even without $\beta$ -blockers(heart beat <60 bpm)<br>5=II/III-degree AV blocks<br>6=Systolic pressure<90mmHg<br>7=Moderate to severe arotic stenosis                                                             | BCYWJ05=9 , BCYWJ06 is not null                                  |

| Table Label           | Variables label                               | Type             | Data Coding                                                                                                                                                                                                                                                                                                                   | Logical Requirements of Interface                                   |
|-----------------------|-----------------------------------------------|------------------|-------------------------------------------------------------------------------------------------------------------------------------------------------------------------------------------------------------------------------------------------------------------------------------------------------------------------------|---------------------------------------------------------------------|
|                       |                                               |                  | 8=Renal failure<br>9=Other reasons(Detailed Description)                                                                                                                                                                                                                                                                      |                                                                     |
| Progress Notes        | 13.Other Reasons                              | Input            |                                                                                                                                                                                                                                                                                                                               | BCYWJ05=9 , BCYWJ06 is not null                                     |
| Progress Notes        | 14.Drug Contraindications-3                   | Input            |                                                                                                                                                                                                                                                                                                                               | BCYWJ07=999, hide question 15-16                                    |
| Progress Notes        | 15.The Reason of Drug Not Prescription        | Single Choice    | 0=Not recorded<br>1=Allergy / Intolerance<br>2=Refused by the patient<br>3=Active bleeding<br>4=Bradycardia even without $\beta$ -blockers(heart beat <60 bpm)<br>5=II/III-degree AV blocks<br>6=Systolic pressure<90mmHg<br>7=Moderate to severe aortic stenosis<br>8=Renal failure<br>9=Other reasons(Detailed Description) | BCYWJ08=9 , BCYWJ09 is not null                                     |
| Progress Notes        | 16.Other Reasons                              | Input            |                                                                                                                                                                                                                                                                                                                               | BCYWJ08=9 , BCYWJ09 is not null                                     |
| CAG Operation Records | 1.Date of Angiography                         | Calendar Format  |                                                                                                                                                                                                                                                                                                                               |                                                                     |
| CAG Operation Records | 2.Dcotor of Angiography-1                     | Input            |                                                                                                                                                                                                                                                                                                                               | IF CAGYS1=999 , hide CAGYS2                                         |
| CAG Operation Records | 3.Dcotor of Angiography-2                     | Input            |                                                                                                                                                                                                                                                                                                                               | IF CAGYS1=999 , hide CAGYS2                                         |
| CAG Operation Records | 4.Vascular Canal                              | Single Choice    | 1=Femoral artery<br>2=radial artery<br>3=brachial artery<br>4=Others                                                                                                                                                                                                                                                          |                                                                     |
| CAG Operation Records | 5.Simultaneous PCI                            | Single Choice    | 1=No<br>2=Yes                                                                                                                                                                                                                                                                                                                 |                                                                     |
| CAG Operation Records | 6.Coronary Stenosis in Angiography            |                  |                                                                                                                                                                                                                                                                                                                               |                                                                     |
| CAG Operation Records | 7-[1]LM(Branch No.5)                          | Multiple Choices | 1                                                                                                                                                                                                                                                                                                                             | CAGXZX01 is null , hide CAGZZYZ<br>CAGXZX01=1 , CAGZZYZ is not null |
| CAG Operation Records | 7-[2] proximal LAD(Branch No.6)               | Multiple Choices | 1                                                                                                                                                                                                                                                                                                                             | CAGXZX02 is null , hide CAGQJYZ<br>CAGXZX02=1 , CAGQJYZ is not null |
| CAG Operation Records | 7-[3]Mid/Distal LAD, Diag(Branch No.7/8/9-10) | Multiple Choices | 1                                                                                                                                                                                                                                                                                                                             | CAGXZX03 is null , hide CAGDJYZ<br>CAGXZX03=1 , CAGDJYZ is not null |
| CAG                   | 7-                                            | Multiple         | 1                                                                                                                                                                                                                                                                                                                             | CAGXZX04 is null , hide CAGDYYZ                                     |

| Table Label           | Variables label                                                        | Type             | Data Coding | Logical Requirements of Interface                                                                                     |
|-----------------------|------------------------------------------------------------------------|------------------|-------------|-----------------------------------------------------------------------------------------------------------------------|
| Operation Records     | [4]OM,LCX,LPDA,LPL( Branch No.12/11, 13/15/14)                         | Choices          |             | CAGXZX04=1 , CAGDYYZ is not null                                                                                      |
| CAG Operation Records | 7-[5]Ramus(Branch No.16)                                               | Multiple Choices | 1           | CAGXZX05 is null , hide CAGZJYZ<br>CAGXZX05=1 , CAGZJYZ is not null                                                   |
| CAG Operation Records | 7-[6]RCA,RPDA,RPL,AM( Branch No.1-3/4)                                 | Multiple Choices | 1           | CAGXZX06 is null , hide CAGYGYZ<br>CAGXZX06=1 , CAGYGYZ is not null                                                   |
| CAG Operation Records | 7-[7]Not Recorded                                                      | Multiple Choices | 1           | CAGXZX07=1 ,<br>hideCAGZZYZ,CAGQJYZ,CAGDJYZ,<br>CAGDYYZ,CAGZJYZ,CAGYGYZ ;<br>CAGXZX07=1 , no valuation in other items |
| CAG Operation Records | 8.Stenosis Presented in Coronary Angiography(%)                        |                  |             |                                                                                                                       |
| CAG Operation Records | 9-[1]Severity of Stenosis in LM( Most Serious Degree)                  | Input            |             | CAGXZX01 is null , hide CAGZZYZ<br>CAGXZX01=1 , CAGZZYZ is not null                                                   |
| CAG Operation Records | 9-[2]Severity of Stenosis in prox LAD( Most Serious Degree)            | Input            |             | CAGXZX02 is null , hide CAGQJYZ<br>CAGXZX02=1 , CAGQJYZ is not null                                                   |
| CAG Operation Records | 9-[3]Severity of Stenosis in Mid/Distal LAD,Diag( Most Serious Degree) | Input            |             | CAGXZX03 is null , hide CAGDJYZ<br>CAGXZX03=1 , CAGDJYZ is not null                                                   |
| CAG Operation Records | 9-[4]Severity of Stenosis in OM,LCX,LPDA,LPL)( Most Serious Degree)    | Input            |             | CAGXZX04 is null , hide CAGDYYZ<br>CAGXZX04=1 , CAGDYYZ is not null                                                   |
| CAG Operation Records | 9-[5]Severity of Stenosis in Ramus( Most Serious Degree)               | Input            |             | CAGXZX05 is null , hide CAGZJYZ<br>CAGXZX05=1 , CAGZJYZ is not null                                                   |
| CAG Operation Records | 9-[6]Severity of Stenosis in RCA,RPDA,RPL,AM( Most Serious Degree)     | Input            |             | CAGXZX06 is null , hide CAGYGYZ<br>CAGXZX06=1 , CAGYGYZ is not null                                                   |
| CAG Operation Records | 10.Vascular Graft Stenosis Presented in Coronary Angiography(%)        |                  |             |                                                                                                                       |
| CAG Operation Records | 10-[1]LM(Branch No.5)                                                  | Multiple Choices | 1           | CAGQXG01 is null , hide<br>CAGQCD01<br>CAGQXG01=1 and CAGQCD01 is not null                                            |
| CAG Operation Records | 10-[2] prox LAD(Branch No.6)                                           | Multiple Choices | 1           | CAGQXG02 is null , hide<br>CAGQCD02<br>CAGQXG02=1 and CAGQCD02 is not null                                            |
| CAG Operation Records | 10-[3]Mid/Distal LAD,Diag(Branch No.7/8/9-10)                          | Multiple Choices | 1           | CAGQXG03 is null , hide<br>CAGQCD03<br>CAGQXG03=1 and CAGQCD03 is not null                                            |

| Table Label           | Variables label                                  | Type             | Data Coding | Logical Requirements of Interface                                                                                                          |
|-----------------------|--------------------------------------------------|------------------|-------------|--------------------------------------------------------------------------------------------------------------------------------------------|
| CAG Operation Records | 10-[4]OM,LCX,LPDA,LPL( Branch No.12/11、13/15/14) | Multiple Choices | 1           | CAGQXG04 is null , hide<br>CAGQCD04<br>CAGQXG04=1 and CAGQCD04 is not null                                                                 |
| CAG Operation Records | 10-[5]RCA,RPDA,RPL,AM( Branch No.1-3/4)          | Multiple Choices | 1           | CAGQXG05 is null , hide<br>CAGQCD05<br>CAGQXG05=1 and CAGQCD05 is not null                                                                 |
| CAG Operation Records | 10-[6] LIMA                                      | Multiple Choices | 1           | CAGQXG06 is null , hide<br>CAGQCD06<br>CAGQXG06=1 and CAGQCD06 is not null                                                                 |
| CAG Operation Records | 10-[7] RIMA                                      | Multiple Choices | 1           | CAGQXG07 is null , hide<br>CAGQCD07<br>CAGQXG07=1 and CAGQCD07 is not null                                                                 |
| CAG Operation Records | 10-[8]Saphenous Vein Graft (SAG)                 | Multiple Choices | 1           | CAGQXG08 is null , hide<br>CAGQCD08<br>CAGQXG08=1 and CAGQCD08 is not null                                                                 |
| CAG Operation Records | 10-[9]None of Above                              | Multiple Choices | 1           | “None of Above” , no valuation in other items<br>CAGQXG09=1 , hide CAGQCD01、CAGQCD02、CAGQCD03、CAGQCD04、CAGQCD05、CAGQCD06、CAGQCD07、CAGQCD08 |
| CAG Operation Records | 11.Severity of Stenosis ( Most Serious Degree)   |                  |             |                                                                                                                                            |
| CAG Operation Records | 11-[1]LM                                         | Input            |             | CAGQXG01 is null , hide<br>CAGQCD01<br>CAGQXG01=1 and CAGQCD01 is not null                                                                 |
| CAG Operation Records | 11-[2]prox LAD                                   | Input            |             | CAGQXG02 is null , hide<br>CAGQCD02<br>CAGQXG02=1 and CAGQCD02 is not null                                                                 |
| CAG Operation Records | 11-[3]Mid/Distal LAD,Diag                        | Input            |             | CAGQXG03 is null , hide<br>CAGQCD03<br>CAGQXG03=1 and CAGQCD03 is not null                                                                 |
| CAG Operation Records | 11-[4]OM,LCX,LPDA,LPL                            | Input            |             | CAGQXG04 is null , hide<br>CAGQCD04<br>CAGQXG04=1 and CAGQCD04 is not null                                                                 |
| CAG Operation Records | 11-[5]RCA,RPDA,RPL,AM                            | Input            |             | CAGQXG05 is null , hide<br>CAGQCD05<br>CAGQXG05=1 and CAGQCD05 is not null                                                                 |
| CAG Operation Records | 11-[6]LIMA                                       | Input            |             | CAGQXG06 is null , hide<br>CAGQCD06                                                                                                        |

| Table Label           | Variables label                                                                                            | Type          | Data Coding             | Logical Requirements of Interface                                       |
|-----------------------|------------------------------------------------------------------------------------------------------------|---------------|-------------------------|-------------------------------------------------------------------------|
|                       |                                                                                                            |               |                         | CAGQXG06=1 and CAGQCD06 is not null                                     |
| CAG Operation Records | 11-[7]RIMA                                                                                                 | Input         |                         | CAGQXG07 is null , hide CAGQCD07<br>CAGQXG07=1 and CAGQCD07 is not null |
| CAG Operation Records | 11-[8]SAG                                                                                                  | Input         |                         | CAGQXG08 is null , hide CAGQCD08<br>CAGQXG08=1 and CAGQCD08 is not null |
| CAG Operation Records | 12.CAG Complications                                                                                       |               |                         |                                                                         |
| CAG Operation Records | 12-[1]Cardiac Shock                                                                                        | Single Choice | 1=No<br>2=Yes           |                                                                         |
| CAG Operation Records | 12-[2]Perioperative MI                                                                                     | Single Choice | 1=No<br>2=Yes           |                                                                         |
| CAG Operation Records | 12-[3]Cardiac Arrest Or Ventricular Fibrillation(Or Electromechanical Dissociation)                        | Single Choice | 1=No<br>2=Yes           |                                                                         |
| CAG Operation Records | Cardiac Tamponade                                                                                          | Single Choice | 1=No<br>2=Yes           |                                                                         |
| CAG Operation Records | 12-[5]Ischemic Strock                                                                                      | Single Choice | 1=No<br>2=Yes           |                                                                         |
| CAG Operation Records | 12-[6]Acute Renal Failure (New Dialysis is Instructed When Creatinine >2mg/dl Or Two Times of Basic Value) | Single Choice | 1=No<br>2=Yes           |                                                                         |
| CAG Operation Records | 12-[7]Pulmonary Edema / Heart Failure                                                                      | Single Choice | 1=No<br>2=Yes           |                                                                         |
| CAG Operation Records | 12-[8]Bleeding/Hematoma in Puncture Site                                                                   | Single Choice | 1=No<br>2=Yes           |                                                                         |
| CAG Operation Records | 12-[9]Retroperitoneal Hemorrhage                                                                           | Single Choice | 1=No<br>2=Yes           |                                                                         |
| CAG Operation Records | 12-[10]Gastrointestinal Bleeding                                                                           | Single Choice | 1=No<br>2=Yes           |                                                                         |
| CAG Operation Records | 12-[11] Intracranial Hemorrhage                                                                            | single choice | 1=No<br>2=Yes           |                                                                         |
| CAG Operation Records | 12-[12]Urogenital Bleeding                                                                                 | single choice | 1=No<br>2=Yes           |                                                                         |
| CAG Operation Records | 12-[13]Pacemaker                                                                                           | single choice | 1=No<br>2=Yes           | CAGBF13=1 , hide CAGBF14                                                |
| CAG Operation         | 12-[14]If Yes, Choose an Option :                                                                          | single choice | 1=Temporary pacemakers. | CAGBF13=2 and CAGBF14 is not null                                       |

| Table Label           | Variables label                           | Type             | Data Coding                                                                         | Logical Requirements of Interface |
|-----------------------|-------------------------------------------|------------------|-------------------------------------------------------------------------------------|-----------------------------------|
| Records               |                                           |                  | 2=Single chamber pacemaker<br>3=Dual chamber pacemaker<br>4=Biventricular pacemaker |                                   |
| CAG Operation Records | 12-[15]ICD                                | single choice    | 1=No<br>2=Yes                                                                       | CAGBF15=1 , hide CAGBF16          |
| CAG Operation Records | 12-[16]If Yes, Choose an Option :         | single choice    | 1=Single chamber<br>2=Dual chamber<br>3=Biventricular                               | CAGBF15=2 and CAGBF16 is not null |
| CAG Operation Records | 13.Other Findings in Coronary Angiography |                  |                                                                                     |                                   |
| CAG Operation Records | 13-[1]None                                | Multiple Choices | 1                                                                                   |                                   |
| CAG Operation Records | 13-[2]Coronary Muscle Bridge              | Multiple Choices | 1                                                                                   |                                   |
| CAG Operation Records | 13-[3]Idiopathic Coronary Dissection      | Multiple Choices | 1                                                                                   |                                   |
| CAG Operation Records | 13-[4]Calcification                       | Multiple Choices | 1                                                                                   |                                   |
| CAG Operation Records | 13-[4]-[1]Calcification Site              | Input            |                                                                                     |                                   |
| CAG Operation Records | 13-[5]Coronary Artery Bifurcation         | Multiple Choices | 1                                                                                   |                                   |
| CAG Operation Records | 13-[5]-[1]Site of Bifurcation             | Input            |                                                                                     |                                   |
| CAG Operation Records | 13-[6]Diffused Stenosis                   | Multiple Choices | 1                                                                                   |                                   |
| CAG Operation Records | 13-[6]-[1]Site of Diffused Stenosis       | Input            |                                                                                     |                                   |
| CAG Operation Records | 13-[7]Plaque                              | Multiple Choices | 1                                                                                   |                                   |
| CAG Operation Records | 13-[7]-[1]Site of Plaque                  | Input            |                                                                                     |                                   |
| CAG Operation Records | 13-[8]Others                              | Multiple Choices | 1                                                                                   |                                   |
| CAG Operation Records | 13-[9]Other Findings                      | Input            |                                                                                     |                                   |
| CAG Operation Records | 14.IVUS in Angiography Procedure          | single choice    | 1=Yes<br>2=No                                                                       |                                   |
| CAG Operation Records | 15.OCT in Angiography Procedure           | single choice    | 1=Yes<br>2=No                                                                       |                                   |



| Table Label                 | Variables label                                                       | Type               | Data Coding                                                                                                                                                                                                                                  | Logical Requirements of Interface                                           |
|-----------------------------|-----------------------------------------------------------------------|--------------------|----------------------------------------------------------------------------------------------------------------------------------------------------------------------------------------------------------------------------------------------|-----------------------------------------------------------------------------|
| CAG<br>Operation<br>Records | 16. Heart Assist<br>Devices Used in<br>Interventional<br>Procedure ?  | single<br>choice   | 1=None<br>2=IABP (intra-<br>aortic balloon<br>pump)<br>3=ECMO<br>( extracorporeal<br>membrane<br>oxygenation)<br>4=LVAD ( left<br>ventricular assist<br>device)<br>5=Impella<br>ventricular assist<br>device<br>6=TandemHeart<br>PTVA system | CAGJXFZ<>1 , CAGJXFZT is not<br>null                                        |
| CAG<br>Operation<br>Records | 17.Time of Employment<br>of Devices in<br>Interventional<br>Procedure | single<br>choice   | 1=Before coronary<br>angiography<br>2=After coronary<br>angiography<br>3=Not recorded                                                                                                                                                        | CAGJXFZ<>1 , CAGJXFZT is not<br>null                                        |
| CAG<br>Operation<br>Records | 18.FFR Measuring in<br>Angiography Procedure                          | single<br>choice   | 1=Yes<br>2=No                                                                                                                                                                                                                                | CAGFFR=1,CAGFFRS is not null                                                |
| CAG<br>Operation<br>Records | 19.FFR Value<br>Measured in<br>Angiography Procedure                  | Input              |                                                                                                                                                                                                                                              | CAGFFR=1,CAGFFRS is not null                                                |
| PCI<br>Operation<br>Records | 1.PCI Status                                                          |                    | 1=Not done<br>2=Selective<br>3=Urgence<br>4=Emergency<br>5=Rescue                                                                                                                                                                            | PCIZT=1 , All other questions in this<br>module is shield                   |
| PCI<br>Operation<br>Records | 2.Time of Entering<br>CathLab                                         | Calendar<br>Format |                                                                                                                                                                                                                                              |                                                                             |
| PCI<br>Operation<br>Records | 3.Name of PCI Doctor-1                                                | Input              |                                                                                                                                                                                                                                              | if PCIXM1=999,hidePCIXM2                                                    |
| PCI<br>Operation<br>Records | 4.Name of PCI Doctor-2                                                | Input              |                                                                                                                                                                                                                                              | if PCIXM1=999,hidePCIXM2                                                    |
| PCI<br>Operation<br>Records | 5.Hybrid Surgery                                                      | single<br>choice   | 1=No<br>2=Yes                                                                                                                                                                                                                                |                                                                             |
| PCI<br>Operation<br>Records | 6.Vascular Canal                                                      | single<br>choice   | 1=Femoral artery<br>2=radial artery<br>3=brachial artery<br>4=Others                                                                                                                                                                         |                                                                             |
| PCI<br>Operation<br>Records | 7.Stent Implanted                                                     | single<br>choice   | 1=No<br>2=Yes                                                                                                                                                                                                                                | PCIZJ=1 , hidePCI21B09、<br>PCI22B09、 PCI23B09、 PCI24B09、<br>PCIZJL、 PCIZJQT |
| PCI<br>Operation<br>Records | 8.Type of Stent                                                       | single<br>choice   | 1=Bare metal stent<br>2=Drug eluting<br>stent<br>3=Others                                                                                                                                                                                    | PCIZJ=2 and PCIZJL is not null                                              |
| PCI<br>Operation<br>Records | 9.Others :                                                            | Input              |                                                                                                                                                                                                                                              | PCIZJL=3 and PCIZJQT is not null                                            |
| PCI                         | 10.IABP                                                               |                    | 1=No                                                                                                                                                                                                                                         |                                                                             |

| Table Label           | Variables label                                        | Type             | Data Coding                                                                                                   | Logical Requirements of Interface                   |
|-----------------------|--------------------------------------------------------|------------------|---------------------------------------------------------------------------------------------------------------|-----------------------------------------------------|
| Operation Records     |                                                        |                  | 2=Yes , before coronary angiography<br>3=Yes , after coronary angiography but before PCI<br>4=Yes , after PCI |                                                     |
| PCI Operation Records | 11.The First Lesion treated by PCI                     | single choice    | 1=Yes<br>2=No                                                                                                 | PCI21B00 The default choice is "Yes"                |
| PCI Operation Records | 12.Site of Lesion                                      |                  |                                                                                                               |                                                     |
| PCI Operation Records | 12-[1]LM                                               | Multiple Choices | 1                                                                                                             |                                                     |
| PCI Operation Records | 12-[2]prox LAD                                         | Multiple Choices | 1                                                                                                             |                                                     |
| PCI Operation Records | 12-[3]Mid/Distal LAD,Diag                              | Multiple Choices | 1                                                                                                             |                                                     |
| PCI Operation Records | 12-[4]OM,LCX,LPDA,LPL                                  | Multiple Choices | 1                                                                                                             |                                                     |
| PCI Operation Records | 12-[5]Ramus                                            | Multiple Choices | 1                                                                                                             |                                                     |
| PCI Operation Records | 12-[6]RCA,RPDA,RPL,AM                                  | Multiple Choices | 1                                                                                                             |                                                     |
| PCI Operation Records | 13.Degree of Stenosis Before PCI(%)                    | Input            |                                                                                                               |                                                     |
| PCI Operation Records | 14.TIMI Flow Classification in The Lesion (Before PCI) | single choice    | 0=0<br>1=1<br>2=2<br>3=3<br>4=Not recorded                                                                    |                                                     |
| PCI Operation Records | 15.Number of Stents in the Lesion                      | Input            |                                                                                                               | PCI2J=1 , hidePCI21B09、PCI22B09、 PCI23B09、 PCI24B09 |
| PCI Operation Records | 16.TIMI Flow Classification in The Lesion (After PCI)  | single choice    | 0=0<br>1=1<br>2=2<br>3=3<br>4=Not recorded                                                                    |                                                     |
| PCI Operation Records | 17.The Second Lesion treated by PCI                    | single choice    | 1=Yes<br>2=No                                                                                                 | PCI22B0=2 , hide the following questions            |
| PCI Operation Records | 18.Site of Lesion                                      |                  |                                                                                                               |                                                     |
| PCI Operation Records | 18-[1]LM                                               | Multiple Choices | 1                                                                                                             |                                                     |
| PCI Operation         | 18-[2]prox LAD                                         | Multiple Choices | 1                                                                                                             |                                                     |

| Table Label           | Variables label                                        | Type             | Data Coding                                | Logical Requirements of Interface                   |
|-----------------------|--------------------------------------------------------|------------------|--------------------------------------------|-----------------------------------------------------|
| Records               |                                                        |                  |                                            |                                                     |
| PCI Operation Records | 18-[3]Mid/Distal LAD,Diag                              | Multiple Choices | 1                                          |                                                     |
| PCI Operation Records | 18-[4]OM,LCX,LPDA,LPL                                  | Multiple Choices | 1                                          |                                                     |
| PCI Operation Records | 18-[5]Ramus                                            | Multiple Choices | 1                                          |                                                     |
| PCI Operation Records | 18-[6]RCA,RPDA,RPL,AM                                  | Multiple Choices | 1                                          |                                                     |
| PCI Operation Records | 19.Degree of Stenosis Before PCI(%)                    | Input            |                                            |                                                     |
| PCI Operation Records | 20.TIMI Flow Classification in The Lesion (Before PCI) | single choice    | 0=0<br>1=1<br>2=2<br>3=3<br>4=Not recorded |                                                     |
| PCI Operation Records | 21.Number of Stents in the Lesion                      | Input            |                                            | PCI2J=1 , hidePCI21B09、PCI22B09、 PCI23B09、 PCI24B09 |
| PCI Operation Records | 22.TIMI Flow Classification in The Lesion (After PCI)  | single choice    | 0=0<br>1=1<br>2=2<br>3=3<br>4=Not recorded |                                                     |
| PCI Operation Records | 23.The Third Lesion treated by PCI                     | single choice    | 1=Yes<br>2=No                              | PCI23B00=2 , hide the following questions           |
| PCI Operation Records | 24.Site of Lesion                                      |                  |                                            |                                                     |
| PCI Operation Records | 24-[1]LM                                               | Multiple Choices | 1                                          |                                                     |
| PCI Operation Records | 24-[2]prox LAD                                         | Multiple Choices | 1                                          |                                                     |
| PCI Operation Records | 24-[3]Mid/Distal LAD,Diag                              | Multiple Choices | 1                                          |                                                     |
| PCI Operation Records | 24-[4]OM,LCX,LPDA,LPL                                  | Multiple Choices | 1                                          |                                                     |
| PCI Operation Records | 24-[5]Ramus                                            | Multiple Choices | 1                                          |                                                     |
| PCI Operation Records | 24-[6]RCA,RPDA,RPL,AM                                  | Multiple Choices | 1                                          |                                                     |
| PCI Operation Records | 25.Degree of Stenosis Before PCI(%)                    | Input            |                                            |                                                     |
| PCI Operation Records | 26.TIMI Flow Classification in The Lesion (Before PCI) | single choice    | 0=0<br>1=1<br>2=2<br>3=3                   |                                                     |

| Table Label           | Variables label                                        | Type             | Data Coding                                | Logical Requirements of Interface                    |
|-----------------------|--------------------------------------------------------|------------------|--------------------------------------------|------------------------------------------------------|
|                       |                                                        |                  | 4=Not recorded                             |                                                      |
| PCI Operation Records | 27.Number of Stents in the Lesion                      | Input            |                                            | PCI2J=1 , hide PCI21B09、PCI22B09、 PCI23B09、 PCI24B09 |
| PCI Operation Records | 28.TIMI Flow Classification in The Lesion (After PCI)  | single choice    | 0=0<br>1=1<br>2=2<br>3=3<br>4=Not recorded |                                                      |
| PCI Operation Records | 29.The Fourth Lesion treated by PCI                    | single choice    | 1=Yes<br>2=No                              | PCI24B00=2 , hide the following questions            |
| PCI Operation Records | 30.Site of Lesion                                      |                  |                                            |                                                      |
| PCI Operation Records | 30-[1]LM                                               | Multiple Choices | 1                                          |                                                      |
| PCI Operation Records | 30-[2]prox LAD                                         | Multiple Choices | 1                                          |                                                      |
| PCI Operation Records | 30-[3]Mid/Distal LAD,Diag                              | Multiple Choices | 1                                          |                                                      |
| PCI Operation Records | 30-[4]OM,LCX,LPDA,LPL                                  | Multiple Choices | 1                                          |                                                      |
| PCI Operation Records | 30-[5]Ramus                                            | Multiple Choices | 1                                          |                                                      |
| PCI Operation Records | 30-[6]RCA,RPDA,RPL,AM                                  | Multiple Choices | 1                                          |                                                      |
| PCI Operation Records | 31.Degree of Stenosis Before PCI(%)                    | Input            |                                            |                                                      |
| PCI Operation Records | 32.TIMI Flow Classification in The Lesion (Before PCI) | single choice    | 0=0<br>1=1<br>2=2<br>3=3<br>4=Not recorded |                                                      |
| PCI Operation Records | 33.Number of Stents in the Lesion                      | Input            |                                            | PCI2J=1 , hide PCI21B09、PCI22B09、 PCI23B09、 PCI24B09 |
| PCI Operation Records | 34.TIMI Flow Classification in The Lesion (After PCI)  | Single Choice    | 0=0<br>1=1<br>2=2<br>3=3<br>4=Not recorded |                                                      |
| PCI Operation Records | 35.PCI Complications                                   |                  |                                            |                                                      |
| PCI Operation Records | 35-[1]Cardiac Shock                                    | Single Choice    | 1=No<br>2=Yes                              |                                                      |
| PCI Operation Records | 35-[2]Perioperative MI                                 | Single Choice    | 1=No<br>2=Yes                              |                                                      |
| PCI Operation         | 35-[3]Cardiac Arrest or Ventricular                    | Single Choice    | 1=No<br>2=Yes                              |                                                      |

| Table Label                 | Variables label                                                                                                          | Type                | Data Coding                                                                                                                | Logical Requirements of Interface |
|-----------------------------|--------------------------------------------------------------------------------------------------------------------------|---------------------|----------------------------------------------------------------------------------------------------------------------------|-----------------------------------|
| Records                     | Fibrillation(或<br>Electromechanical<br>Dissociation)                                                                     |                     |                                                                                                                            |                                   |
| PCI<br>Operation<br>Records | 35-[4]Cardiac<br>Tamponade                                                                                               | Single<br>Choice    | 1=No<br>2=Yes                                                                                                              |                                   |
| PCI<br>Operation<br>Records | 35-[5]Ischemic Strock                                                                                                    | Single<br>Choice    | 1=No<br>2=Yes                                                                                                              |                                   |
| PCI<br>Operation<br>Records | 35-[6]Acute Renal<br>Failure(New Dialysis is<br>Instructed When<br>Creatinine >2mg/dl Or<br>Two Times of Basic<br>Value) | Single<br>Choice    | 1=No<br>2=Yes                                                                                                              |                                   |
| PCI<br>Operation<br>Records | 35-[7]Pulmonary<br>Edema / Heart Failure                                                                                 | Single<br>Choice    | 1=No<br>2=Yes                                                                                                              |                                   |
| PCI<br>Operation<br>Records | 35-<br>[8]Bleeding/Hematoma<br>in Puncture Site                                                                          | Single<br>Choice    | 1=No<br>2=Yes                                                                                                              |                                   |
| PCI<br>Operation<br>Records | 35-[9]Retroperitoneal<br>Hemorrhage                                                                                      | Single<br>Choice    | 1=No<br>2=Yes                                                                                                              |                                   |
| PCI<br>Operation<br>Records | 35-[10]Gastrointestinal<br>Bleeding                                                                                      | Single<br>Choice    | 1=No<br>2=Yes                                                                                                              |                                   |
| PCI<br>Operation<br>Records | 35-[11] Intracranial<br>Hemorrhage                                                                                       | Single<br>Choice    | 1=No<br>2=Yes                                                                                                              |                                   |
| PCI<br>Operation<br>Records | 35-[12]Urogenital<br>Bleeding                                                                                            | Single<br>Choice    | 1=No<br>2=Yes                                                                                                              |                                   |
| PCI<br>Operation<br>Records | 35-[13]Pacemaker                                                                                                         | Single<br>Choice    | 1=No<br>2=Yes                                                                                                              | PCIBF13=1 , hide PCIBF14          |
| PCI<br>Operation<br>Records | 35-[14]If Yes, Choose<br>An Option :                                                                                     | Single<br>Choice    | 1=Temporary<br>pacemakers.<br>2=Single chamber<br>pacemaker<br>3=Dual chamber<br>pacemaker<br>4=Biventricular<br>pacemaker | PCIBF13=2 and PCIBF14 is not null |
| PCI<br>Operation<br>Records | 35-[15]ICD                                                                                                               | Single<br>Choice    | 1=No<br>2=Yes                                                                                                              | PCIBF15=1 , hide PCIBF16          |
| PCI<br>Operation<br>Records | 35-[16]If Yes, Choose<br>An Option :                                                                                     | Single<br>Choice    | 1=Single chamber<br>2=Dual chamber<br>3=Biventricular                                                                      | PCIBF15=2 and PCIBF16 is not null |
| PCI<br>Operation<br>Records | 36.PCI Complications<br>of Coronary Artery                                                                               |                     |                                                                                                                            |                                   |
| PCI<br>Operation<br>Records | 36-[1]Obvious Artery<br>Dissection                                                                                       | Multiple<br>Choices | 1                                                                                                                          |                                   |
| PCI<br>Operation<br>Records | 36-[2]Coronary Artery<br>Rupture                                                                                         | Multiple<br>Choices | 1                                                                                                                          |                                   |
| PCI                         | 36-[3]Sudden Occlusion                                                                                                   | Multiple            | 1                                                                                                                          |                                   |

| Table Label                    | Variables label                                      | Type             | Data Coding                                                              | Logical Requirements of Interface            |
|--------------------------------|------------------------------------------------------|------------------|--------------------------------------------------------------------------|----------------------------------------------|
| Operation Records              | of Coronary Artery                                   | Choices          |                                                                          |                                              |
| PCI Operation Records          | 36-[4]Occlusion in Collateral Circulation            | Multiple Choices | 1                                                                        |                                              |
| PCI Operation Records          | 36-[5]Thrombosis in Distal Vessels                   | Multiple Choices | 1                                                                        |                                              |
| PCI Operation Records          | 36-[6]No-Reflow Phenomenon                           | Multiple Choices | 1                                                                        |                                              |
| PCI Operation Records          | 36-[7]None of Above                                  | Multiple Choices | 1                                                                        | PCINBP07=1, no valuation in other items      |
| PCI Operation Records          | 37.Puncture Site Complications                       |                  |                                                                          |                                              |
| PCI Operation Records          | 37-[1]Vascular Occlusion in Puncture Site            | Multiple Choices | 1                                                                        |                                              |
| PCI Operation Records          | 37-[2]Arteriovenous Fistula in Puncture Site         | Multiple Choices | 1                                                                        |                                              |
| PCI Operation Records          | 37-[3]Hematoma in Puncture Site                      | Multiple Choices | 1                                                                        |                                              |
| PCI Operation Records          | 37-[4]Vascular Dissection in Puncture Site           | Multiple Choices | 1                                                                        |                                              |
| PCI Operation Records          | 37-[5]Surgery Needed for Puncture Site Complications | Multiple Choices | 1                                                                        |                                              |
| PCI Operation Records          | 37-[6]Peripheral Arterial Embolism                   | Multiple Choices | 1                                                                        |                                              |
| PCI Operation Records          | 37-[7]None of Above                                  | Multiple Choices | 1                                                                        | PCINCP07=1,no valuation in other items       |
| CABG & Other Operation Records | 1.CABG Status                                        | Single Choice    | 1=Not done<br>2=Selective<br>3=Urgent<br>4=Emergency<br>5=Rescue         | CABGZT=1 , hide all questions in this module |
| CABG & Other Operation Records | 2.Date of Surgery                                    | Calendar Format  |                                                                          |                                              |
| CABG & Other Operation Records | 3.Name of Surgeon-1                                  | Input            |                                                                          | CABGX1=999.hide CABGX2                       |
| CABG & Other Operation Records | 4.Name of Surgeon-2                                  | Input            |                                                                          | CABGX1=999.hide CABGX2                       |
| CABG & Other Operation Records | 5.CABG Method                                        | Single Choice    | 1=Off-pump<br>2=On-pump<br>3=Shift from off-pump to on-pump<br>4=Unknown |                                              |

| Table Label                    | Variables label                                                | Type          | Data Coding                                                                                                                                                                                                                                | Logical Requirements of Interface                                                                                                                                                                  |
|--------------------------------|----------------------------------------------------------------|---------------|--------------------------------------------------------------------------------------------------------------------------------------------------------------------------------------------------------------------------------------------|----------------------------------------------------------------------------------------------------------------------------------------------------------------------------------------------------|
| CABG & Other Operation Records | 6.CABG Was Employed for the Treatment of PCI/CAG Complications | Single Choice | 1=No<br>2=Yes                                                                                                                                                                                                                              |                                                                                                                                                                                                    |
| CABG & Other Operation Records | 7.Hybrid Surgery                                               | Single Choice | 1=No<br>2=Yes                                                                                                                                                                                                                              |                                                                                                                                                                                                    |
| CABG & Other Operation Records | 8.If the First Bypass Graft was Used in CABG                   | Single Choice | 1=No<br>2=Yes                                                                                                                                                                                                                              | CABGDQ01=1 , hide CABGDQ02<br>CABGDQ03 CABGDQ04<br>CABGDQ05 CABGDQ06<br>CABGDQ07 CABGDQ08<br>CABGDQ09 CABGDQ10<br>CABGDQ11 CABGDQ12<br>CABGDQ13 CABGDQ14<br>CABGDQ15 CABGDQ16<br>CABGDQ17 CABGDQ18 |
| CABG & Other Operation Records | 9.The Type of the First Graft                                  | Single Choice | 1=Saphenous vein graft(SVG)<br>2=Radial artery(RA)<br>3=Left internal mammary artery(LIMA)<br>4=Right internal mammary artery(RIMA)<br>5=Free internal mammary artery(FIMA)<br>6=Others                                                    |                                                                                                                                                                                                    |
| CABG & Other Operation Records | 10.Distal Anastomosis Site of the First Graft                  | Single Choice | 1=Left anterior descending(LAD)<br>2=DIAG/Diagnoal Branches/D1/D2/D3<br>3=Obtuse marginal(OM)<br>4=Right coronary artery(RCA)<br>5=Posterior descending(PD)<br>6=Posterior branch of the left ventricle(PLVB)<br>7=Intermediate branch(RM) |                                                                                                                                                                                                    |
| CABG & Other Operation Records | 11.If the Second Bypass Graft was Used in CABG                 | Single Choice | 1=No<br>2=Yes                                                                                                                                                                                                                              | CABGDQ04=1 , hide CABGDQ05<br>CABGDQ06 CABGDQ07<br>CABGDQ08 CABGDQ09<br>CABGDQ10 CABGDQ11<br>CABGDQ12 CABGDQ13<br>CABGDQ14 CABGDQ15<br>CABGDQ16 CABGDQ17<br>CABGDQ18                               |
| CABG & Other Operation Records | 12.The Type of the Second Graft                                | Single Choice | 1=Saphenous vein graft(SVG)<br>2=Radial artery(RA)<br>3=Left internal                                                                                                                                                                      |                                                                                                                                                                                                    |

| Table Label                    | Variables label                                  | Type          | Data Coding                                                                                                                                                                                                                                | Logical Requirements of Interface                                                                                                   |
|--------------------------------|--------------------------------------------------|---------------|--------------------------------------------------------------------------------------------------------------------------------------------------------------------------------------------------------------------------------------------|-------------------------------------------------------------------------------------------------------------------------------------|
|                                |                                                  |               | mammary artery(LIMA)<br>4=Right internal mammary artery(RIMA)<br>5=Free internal mammary artery(FIMA)<br>6=Others                                                                                                                          |                                                                                                                                     |
| CABG & Other Operation Records | 13.Distal Anastomosis Site of the Second Graft   | Single Choice | 1=Left anterior descending(LAD)<br>2=DIAG/Diagnoal Branches/D1/D2/D3<br>3=Obtuse marginal(OM)<br>4=Right coronary artery(RCA)<br>5=Posterior descending(PD)<br>6=Posterior branch of the left ventricle(PLVB)<br>7=Intermediate branch(RM) |                                                                                                                                     |
| CABG & Other Operation Records | 14.If the Third of Bypass Graft was Used in CABG | Single Choice | 1=No<br>2=Yes                                                                                                                                                                                                                              | CABGDQ07=1 , hide CABGDQ08<br>CABGDQ09 CABGDQ10<br>CABGDQ11 CABGDQ12<br>CABGDQ13 CABGDQ14<br>CABGDQ15 CABGDQ16<br>CABGDQ17 CABGDQ18 |
| CABG & Other Operation Records | 15.The Type of the Third Graft                   | Single Choice | 1=Saphenous vein graft(SVG)<br>2=Radial artery(RA)<br>3=Left internal mammary artery(LIMA)<br>4=Right internal mammary artery(RIMA)<br>5=Free internal mammary artery(FIMA)<br>6=Others                                                    |                                                                                                                                     |
| CABG & Other Operation Records | 16.Distal Anastomosis Site of the Third Graft    | Single Choice | 1=Left anterior descending(LAD)<br>2=DIAG/Diagnoal Branches/D1/D2/D3<br>3=Obtuse marginal(OM)<br>4=Right coronary artery(RCA)<br>5=Posterior descending(PD)<br>6=Posterior branch of the left ventricle(PLVB)<br>7=Intermediate            |                                                                                                                                     |



| Table Label                    | Variables label                                | Type          | Data Coding                                                                                                                                                                                                                                | Logical Requirements of Interface                                                                     |
|--------------------------------|------------------------------------------------|---------------|--------------------------------------------------------------------------------------------------------------------------------------------------------------------------------------------------------------------------------------------|-------------------------------------------------------------------------------------------------------|
|                                |                                                |               | branch(RM)                                                                                                                                                                                                                                 |                                                                                                       |
| CABG & Other Operation Records | 17.If the Fourth Bypass Graft was Used in CABG | Single Choice | 1=No<br>2=Yes                                                                                                                                                                                                                              | CABGDQ10=1 , hide CABGDQ11<br>CABGDQ12 CABGDQ13<br>CABGDQ14 CABGDQ15<br>CABGDQ16 CABGDQ17<br>CABGDQ18 |
| CABG & Other Operation Records | 18.The Type of the Fourth Graft                | Single Choice | 1=Saphenous vein graft(SVG)<br>2=Radial artery(RA)<br>3=Left internal mammary artery(LIMA)<br>4=Right internal mammary artery(RIMA)<br>5=Free internal mammary artery(FIMA)<br>6=Others                                                    |                                                                                                       |
| CABG & Other Operation Records | 19.Distal Anastomosis Site of the Fourth Graft | Single Choice | 1=Left anterior descending(LAD)<br>2=DIAG/Diagnoal Branches/D1/D2/D3<br>3=Obtuse marginal(OM)<br>4=Right coronary artery(RCA)<br>5=Posterior descending(PD)<br>6=Posterior branch of the left ventricle(PLVB)<br>7=Intermediate branch(RM) |                                                                                                       |
| CABG & Other Operation Records | 20.If the Fifth Bypass Graft was Used in CABG  | Single Choice | 1=No<br>2=Yes                                                                                                                                                                                                                              | CABGDQ13=1 , hide CABGDQ14<br>CABGDQ15 CABGDQ16<br>CABGDQ17 CABGDQ18                                  |
| CABG & Other Operation Records | 21.The Type of the Fifth Graft                 | Single Choice | 1=Saphenous vein graft(SVG)<br>2=Radial artery(RA)<br>3=Left internal mammary artery(LIMA)<br>4=Right internal mammary artery(RIMA)<br>5=Free internal mammary artery(FIMA)<br>6=Others                                                    |                                                                                                       |
| CABG & Other Operation Records | 22.Distal Anastomosis Site of the Fifth Graft  | Single Choice | 1=Left anterior descending(LAD)<br>2=DIAG/Diagnoal Branches/D1/D2/D3<br>3=Obtuse                                                                                                                                                           |                                                                                                       |

| Table Label                    | Variables label                                                                       | Type          | Data Coding                                                                                                                                                                                                                                | Logical Requirements of Interface      |
|--------------------------------|---------------------------------------------------------------------------------------|---------------|--------------------------------------------------------------------------------------------------------------------------------------------------------------------------------------------------------------------------------------------|----------------------------------------|
|                                |                                                                                       |               | marginal(OM)<br>4=Right coronary artery(RCA)<br>5=Posterior descending(PD)<br>6=Posterior branch of the left ventricle(PLVB)<br>7=Intermediate branch(RM)                                                                                  |                                        |
| CABG & Other Operation Records | 8.If the Sixth Bypass Graft was Used in CABG                                          | Single Choice | 1=No<br>2=Yes                                                                                                                                                                                                                              | CABGDQ16=1 , hide CABGDQ17<br>CABGDQ18 |
| CABG & Other Operation Records | 24.The Type of the Sixth Graft                                                        | Single Choice | 1=Saphenous vein graft(SVG)<br>2=Radial artery(RA)<br>3=Left internal mammary artery(LIMA)<br>4=Right internal mammary artery(RIMA)<br>5=Free internal mammary artery(FIMA)<br>6=Others                                                    |                                        |
| CABG & Other Operation Records | 10.Distal Anastomosis Site of the Sixth Graft                                         | Single Choice | 1=Left anterior descending(LAD)<br>2=DIAG/Diagnoal Branches/D1/D2/D3<br>3=Obtuse marginal(OM)<br>4=Right coronary artery(RCA)<br>5=Posterior descending(PD)<br>6=Posterior branch of the left ventricle(PLVB)<br>7=Intermediate branch(RM) |                                        |
| CABG & Other Operation Records | 26.If IABP Was Used in the Surgery                                                    | Single Choice | 1=No<br>2=Yes                                                                                                                                                                                                                              |                                        |
| CABG & Other Operation Records | 27.If Assist Devices(VAD/LVAD/RVAD/Ventricular Assist Device)Were Used in the Sirgery | Single Choice | 1=No<br>2=Yes                                                                                                                                                                                                                              | CABGXH=1 , hide CABGXHS                |
| CABG & Other Operation Records | 28.If Yes, Choose An Option                                                           | Single Choice | 1=Left ventricular assist device<br>2=Right ventricular assist device                                                                                                                                                                      | CABGXH=2 and CABGXHS is not null       |
| CABG & Other Operation Records | 29.If PVAD Was Used in the Surgery                                                    | Single Choice | 1=No<br>2=Yes                                                                                                                                                                                                                              |                                        |

| Table Label                    | Variables label                                                    | Type          | Data Coding                                                          | Logical Requirements of Interface  |
|--------------------------------|--------------------------------------------------------------------|---------------|----------------------------------------------------------------------|------------------------------------|
| CABG & Other Operation Records | 30.Resection of Left Ventricular Aneurysm                          | Single Choice | 1=No<br>2=Yes                                                        |                                    |
| CABG & Other Operation Records | 31.Repairation of ventricular septal rupture After MI              | Single Choice | 1=No<br>2=Yes                                                        |                                    |
| CABG & Other Operation Records | 32.Valvular Surgery                                                | Single Choice | 1=No<br>2=Yes                                                        | CABGQT=1,hide CABGZD、CABGRJ、CABGSJ |
| CABG & Other Operation Records | 32-[1]Aortic Valve                                                 | Single Choice | 1=Mechanic valve<br>2=Biologic valve<br>3=Valvuloplasty<br>4=Unknown | CABGQT=2 and CABGZD is not null    |
| CABG & Other Operation Records | 32-[2]Mitral Valve                                                 | Single Choice | 1=Mechanic valve<br>2=Biologic valve<br>3=Valvuloplasty<br>4=Unknown | CABGQT=2 and CABGRJ is not null    |
| CABG & Other Operation Records | 32-[3]Tricuspid Valve                                              | Single Choice | 1=Mechanic valve<br>2=Biologic valve<br>3=Valvuloplasty<br>4=Unknown | CABGQT=2 and CABGSJ is not null    |
| CABG & Other Operation Records | 33.Other Cardiac Surgery                                           | Input         |                                                                      |                                    |
| CABG & Other Operation Records | 34.CABG Complications                                              |               |                                                                      |                                    |
| CABG & Other Operation Records | 34-[1] for Bleeding/Cardiac Tamponade Re-operation                 | Single Choice | 1=No<br>2=Yes                                                        |                                    |
| CABG & Other Operation Records | 34-[2]Re-operation for Valve Dysfunction                           | Single Choice | 1=No<br>2=Yes                                                        |                                    |
| CABG & Other Operation Records | 34-[3]Re-operation for Graft Occlusion                             | Single Choice | 1=No<br>2=Yes                                                        |                                    |
| CABG & Other Operation Records | 34-[4]Re-operation for Other Cardiac Problems                      | Single Choice | 1=No<br>2=Yes                                                        |                                    |
| CABG & Other Operation Records | 34-[5]]Re-operation for Other Non-Cardiac Problems                 | Single Choice | 1=No<br>2=Yes                                                        |                                    |
| CABG & Other Operation Records | 34-[6]Deep Sternum Infection (Mediastinum Infection or Wire Slack) | Single Choice | 1=No<br>2=Yes                                                        |                                    |
| CABG & Other Operation Records | 34-[7]Perioperative MI                                             | Single Choice | 1=No<br>2=Yes                                                        |                                    |

| Table Label                    | Variables label                                                                      | Type            | Data Coding                                                                                                    | Logical Requirements of Interface                                               |
|--------------------------------|--------------------------------------------------------------------------------------|-----------------|----------------------------------------------------------------------------------------------------------------|---------------------------------------------------------------------------------|
| CABG & Other Operation Records | 34-[8]Re-enter ICU                                                                   | Single Choice   | 1=No<br>2=Yes                                                                                                  |                                                                                 |
| CABG & Other Operation Records | 34-[9]Secondary endotracheal intubation                                              | Single Choice   | 1=No<br>2=Yes                                                                                                  |                                                                                 |
| CABG & Other Operation Records | 34-[10]New-Onset Atrial Fibrillation                                                 | Single Choice   | 1=No<br>2=Yes                                                                                                  |                                                                                 |
| CABG & Other Operation Records | 34-[11]Cardiac Arrest or Ventricular Fibrillation(or Electromechanical Dissociation) | Single Choice   | 1=No<br>2=Yes                                                                                                  |                                                                                 |
| CABG & Other Operation Records | 34-[12]New-Onset of Stroke(Ischemic/hemorrhagic)                                     | Single Choice   | 1=No<br>2=Yes                                                                                                  |                                                                                 |
| CABG & Other Operation Records | 34-[13]Renal Failure                                                                 | Single Choice   | 1=No<br>2=Yes                                                                                                  |                                                                                 |
| CABG & Other Operation Records | 34-[14]Pacemaker                                                                     | Single Choice   | 1=No<br>2=Yes                                                                                                  | CABGBF14=1 , hide CABGBF15                                                      |
| CABG & Other Operation Records | 34-[15]If Yes, Choose An Option :                                                    | Single Choice   | 1=Temporary pacemakers.<br>2=Single chamber pacemaker<br>3=Dual chamber pacemaker<br>4=Biventricular pacemaker | CABGBF14=2 and CABGBF15 is not null                                             |
| CABG & Other Operation Records | 34-[16]ICD                                                                           | Single Choice   | 1=No<br>2=Yes                                                                                                  | CABGBF16=1 , hide CABGBF17                                                      |
| CABG & Other Operation Records | 34-[17]If Yes, Choose An Option :                                                    | Single Choice   | 1=Single chamber<br>2=Dual chamber<br>3=Biventricular<br>4=Can not be classified                               | CABGBF16=2 and CABGBF17 is not null                                             |
| Physical Examination           | Physical Examination                                                                 |                 |                                                                                                                |                                                                                 |
| Physical Examination           | 1.If Cardiac Ultrasonography Was Used Before Angiography?                            | Single Choice   | 1=No<br>2=Yes                                                                                                  | PECU=1 , hide PECUD、PECUSX、PECUSXQ、PECUSXY、PECUHJ、PECUSBL、PECUMD、PECUMDY、PECUEJ |
| Physical Examination           | 2.The Date of the Recent Cardiac Ultrasonography(Before Angiography)                 | Calendar Format |                                                                                                                | PECU=2 and PECUD is not null<br>PECUD<CAGD                                      |
| Physical Examination           | 3.LVEF/EF Value(%)                                                                   | Input           |                                                                                                                | PECU=2 and PECUSX is not null ;                                                 |

| Table Label          | Variables label                                                 | Type            | Data Coding                                                                                                       | Logical Requirements of Interface                                         |
|----------------------|-----------------------------------------------------------------|-----------------|-------------------------------------------------------------------------------------------------------------------|---------------------------------------------------------------------------|
|                      |                                                                 |                 |                                                                                                                   | PECUSX<>999 , hide PECUSXQ ;<br>PECUSX=999 , PECUSXQ is not null          |
| Physical Examination | 4.Other record regarding left ventricular function              | Single Choice   | 1=No<br>2=Yes                                                                                                     | PECUSX<>999 , hide PECUSXQ ;<br>PECUSX=999 , PECUSXQ is not null          |
| Physical Examination | 5.If Yes, Please Choose the Degree                              | Single Choice   | 1=Unknown<br>2=Normal<br>3=Normal to mild<br>4=Mild to moderate<br>5=Moderate<br>6=Moderate to severe<br>7=severe | PECUSXQ=1 and hide PECUSXY<br>PECUSXQ=2 and PECUSXY is not null           |
| Physical Examination | 6.LVDD/LVEDD(mm)                                                | Input           |                                                                                                                   | PECU=2 and PECUHJ is not null                                             |
| Physical Examination | 7.Left Ventricular Aneurysm                                     | Single Choice   | 1=Not mentioned<br>2=Yes                                                                                          | PECU=2 and PECUSBL is not null                                            |
| Physical Examination | 8.Pulmonary Artery Hypertension                                 | Single Choice   | 1=Not mentioned<br>2=Yes                                                                                          | PECU=2 and PECUMD is not null<br>PECUMD=1 , hide PECUMDY                  |
| Physical Examination | 9.If Yes , The Estimated Pulmonary Artery Pressure Value (mmHg) | Input           |                                                                                                                   | PECUMD=2 and PECUMDY is not null                                          |
| Physical Examination | 10.Mitral Regurgitation                                         | Single Choice   | 1=mild<br>2=moderate<br>3=severe<br>4=Not mentioned                                                               | PECU=2 and PECUEJ is not null                                             |
| Physical Examination | 11.If Stress Test Was Performed Before Angiography              | Single Choice   | 1=No<br>2=Yes                                                                                                     | PEFH=1 , hide PEFHD、PEFHZ、PEFHQ、PEFHF、PEFHR                               |
| Physical Examination | 11-[1]The Date of the Recent Test Before Angiography            | Calendar Format |                                                                                                                   | PEFH=2 and PEFHD is not null<br>PEFHD<CAGD                                |
| Physical Examination | 11-[2]Types                                                     | Single Choice   | 1=Only ECG<br>2=Radionuclide Imaging<br>3=Cardiac ultrasound<br>4=CMR<br>5=Others :<br>6=Unknown                  | PEFH=2 and PEFHZ is not null                                              |
| Physical Examination | 11-[3]Others :                                                  | Input           |                                                                                                                   | PEFHZ=1 or 2 or 3 or 4 or 6 , hide PEFHQ<br>PEFHZ=5 and PEFHQ is not null |
| Physical Examination | 11-[4]Methods                                                   | Single Choice   | 1=Exercise of Maximal Load<br>2=Exercise of Sub-Maximal Load<br>3=Pharmacological Stress Test<br>4=Unknown        | PEFH=2 and PEFHF is not null                                              |
| Physical Examination | 11-[5]Results                                                   | Single Choice   | 1=Positive<br>2=Negative<br>3=Suspected<br>4=Unknown                                                              | PEFH=2 and PEFHR is not null                                              |
| Physical Examination | 12.If Carotid ultrasound Was Performed Before                   | Single Choice   | 1=No<br>2=Yes                                                                                                     | PEJU=1 , hide PEJUD、PEJUR                                                 |

| Table Label          | Variables label                                      | Type            | Data Coding                                                                                                                                                | Logical Requirements of Interface                                 |
|----------------------|------------------------------------------------------|-----------------|------------------------------------------------------------------------------------------------------------------------------------------------------------|-------------------------------------------------------------------|
|                      | Angiography                                          |                 |                                                                                                                                                            |                                                                   |
| Physical Examination | 12-[1]The Date of the Recent Test Before Angiography | Calendar Format |                                                                                                                                                            | PEJU=2 and PEJUD is not null<br>PEJUD<CAGD                        |
| Physical Examination | 12-[2]Results                                        | Single Choice   | 1=No Stenosis<br>2=Stenosis<50 %<br>3=Stenosis50%-69%<br>4=Stenosis70%-99%<br>5=Stenosis100%<br>6=The Degree of Stenosis is Undetermined<br>7=Not Recorded | PEJU=2 and PEJUR is not null                                      |
| Physical Examination | 13.If CTA Was Performed Before Angiography           | Single Choice   | 1=No<br>2=Yes                                                                                                                                              | PECT=1 , hide PECTD、PECTR、PRCTGH                                  |
| Physical Examination | 13-[1]The Date of the Recent Test Before Angiography | Calendar Format |                                                                                                                                                            | PECT=2 and PECTD is not null<br>PECT<CAGD                         |
| Physical Examination | 13-[2]Results                                        | Single Choice   | 1=Positive Phenotype of CHD<br>2=Negative Phenotype of CHD<br>3=Suspected CHD<br>4=Unknown                                                                 | PECT=2 and PECTR is not null                                      |
| Physical Examination | 13-[3]Cardiovascular Calcification Score             | Input           |                                                                                                                                                            | PECT=2 and PRCTGH is not null                                     |
| Temperature Sheet    | 1.Height(cm)                                         | Input           |                                                                                                                                                            |                                                                   |
| Temperature Sheet    | 2.Weight(kg)                                         | Input           |                                                                                                                                                            |                                                                   |
| Temperature Sheet    | 3.Study Number                                       | Input           |                                                                                                                                                            | Should be identified to the first question                        |
| End Inputting Table  | 238.Please Check If the Inputting Was Accomplished   | Single Choice   | Y=Yes<br>N=No                                                                                                                                              | ENDYN=N and ENDCOMM is not null                                   |
| End Inputting Table  | 239.Remarks of Case History                          | Input           |                                                                                                                                                            |                                                                   |
| End Inputting Table  | Input the Date of Completion                         |                 | Automatically generated by System                                                                                                                          |                                                                   |
| End Inputting Table  | Input the Name of the Accomplish Man                 |                 | Automatically generated by System                                                                                                                          |                                                                   |
| End QC Table         | If QC was accomplished                               | Single Choice   | Y=Yes<br>N=No                                                                                                                                              | ENDYN=N QC table can not be built ; QCYN=N and QCCOMM is not null |
| End QC Table         | QC Remarks                                           | Input           |                                                                                                                                                            |                                                                   |
| End QC Table         | QC Ending Time                                       |                 | Automatically generated by System                                                                                                                          |                                                                   |
| End QC Table         | QC Accomplish Man                                    |                 | Automatically generated by System                                                                                                                          |                                                                   |



# Quality Assurance and Quality Control Strategies in Medical Record Abstraction

## Background

Medical record abstraction can be guided by the types of data being abstracted. The investigators have defined as *simple data elements* those elements that can be abstracted directly from the chart without use of professional judgment. Examples include the date of admission, patient sex, patient age, serum creatinine on hospital day 1, etc.

In contrast, *complex data elements* are those that require more advanced medical knowledge for abstraction. Examples of complex data elements include the presence of comorbidities, evidence of pulmonary edema on hospital presentation, development of post-procedural complications such as bleeding or arrhythmia, and so on.

Within the Chinese medical record, simple data elements are found predominantly in the medical record face sheet, section for laboratory testing results and physician orders. Complex elements are found throughout all other sections of the medical record including the admission record, discharge record and diagnostic reports, etc.

## Training and Qualification of Abstractors

The abstractors for simple data elements were clerks with experience in medical record abstraction. The abstractors for complex data elements were undergraduate or post-graduate trainees. Most were medical students.

Each abstractor was given a set of training materials about medical record abstraction, including *CHINA PEACE: A Brief Introduction*, *China PEACE: Operation Manual of Medical Record Abstraction*, and 30 standard training medical records.

Each abstractor also underwent the following training courses: (1) Introduction to the China PEACE-3VD protocol; (2) Coronary arteries, coronary heart disease and its subtypes; (3) Component parts of the inpatient medical record and their contents; (4) China PEACE-3VD data dictionary; (5) Frequently asked questions in medical record abstraction; (6) Quality assurance and quality control measures in China PEACE-3VD; and (7) Intensive guidance in abstracting 15 standard training medical records followed by group discussion and retraining as needed.

Once training was completed, each abstractor reviewed 30 standard training medical records. Supervisors were responsible for evaluating the accuracy of abstraction. Every abstractor needed to achieve greater than 98 percent abstraction accuracy in order to be considered competent.

## Quality Control in Medical Record Abstraction

The investigators randomly audit approximately 5% of the abstracted records. If the records have not been abstracted with 98% accuracy, all records in the audited batch are considered



unqualified and are re-reviewed by a different abstractor. Discrepancies in abstraction are resolved by review of the original medical record.

To minimize abstraction errors, abstractors start by abstracting only printed medical records. After gaining experience, these individuals are allowed to begin abstracting hand-written records. In addition, a physician is always present in the room with abstractors or is available online to answer questions and address areas of concern as they arise. Common problems have led to updates of the data dictionary and database into which data are directly entered. This database has been additionally customized to expedite the identification of medications that may have more than one trade name. Furthermore, medical records belonging to the same hospital and year are assigned to a broad group of reviewers to avoid potential residual disparities in quality among different abstractors

### **Data Management and Cleaning**

Ongoing data cleaning is performed in a systematic manner. Data is regularly queried for invalid and illogical values as well as for duplicate record entry. Outliers in continuous data distributions are identified as potentially invalid and are further explored. Duplicate records are identified by the presence of identical study identification numbers, hospital identification numbers, medical record identification numbers, and dates of discharge. Once a data query is made, concerns are resolved after tracing and reviewing the relevant records.

## Baseline and Follow-up Questionnaires

### Baseline Interview

|           |                                                                                                                                                                                                                                                                                                                                                                                                                                                                                                                                                                                                                 |
|-----------|-----------------------------------------------------------------------------------------------------------------------------------------------------------------------------------------------------------------------------------------------------------------------------------------------------------------------------------------------------------------------------------------------------------------------------------------------------------------------------------------------------------------------------------------------------------------------------------------------------------------|
| <b>A.</b> | <b>INFORMED CONSENT AND BASIC INFORMATION</b>                                                                                                                                                                                                                                                                                                                                                                                                                                                                                                                                                                   |
| A.1       | The result of informed consent of patient<br><input type="checkbox"/> Younger than 18 years old<br><input type="checkbox"/> Dead before interview<br><input type="checkbox"/> Discharged before interview<br><input type="checkbox"/> Have participated in the research before<br><input type="checkbox"/> Is not able to accomplish the interview for serious disease, or mental abnormality or communication difficulties<br><input type="checkbox"/> Is willing to participate in the prospective follow-up study<br><input type="checkbox"/> Is unwilling to participate in the prospective follow-up study |
| A.2       | <b>[If willing to participate in the prospective follow-up study]</b> The date of signing the informed consent is _____                                                                                                                                                                                                                                                                                                                                                                                                                                                                                         |
| A.3       | <b>[If willing to participate in the prospective follow-up study]</b> The name of the doctor who accomplishes the informed consent<br>_____                                                                                                                                                                                                                                                                                                                                                                                                                                                                     |
| A.4       | <b>[If willing to participate in the prospective follow-up study]</b> The name of the patient _____                                                                                                                                                                                                                                                                                                                                                                                                                                                                                                             |
| A.5       | <b>[If willing to participate in the prospective follow-up study]</b> Sex<br><input type="checkbox"/> Male <input type="checkbox"/> Female                                                                                                                                                                                                                                                                                                                                                                                                                                                                      |
| A.6       | <b>[If willing to participate in the prospective follow-up study]</b> The birthday of the patient _____                                                                                                                                                                                                                                                                                                                                                                                                                                                                                                         |
| A.7       | <b>[If willing to participate in the prospective follow-up study]</b> The ID number of the patient _____                                                                                                                                                                                                                                                                                                                                                                                                                                                                                                        |
| A.8       | <b>[If willing to participate in the prospective follow-up study]</b> Other identification Number _____                                                                                                                                                                                                                                                                                                                                                                                                                                                                                                         |
| <b>C.</b> | <b>ONSET OF SYMPTOMS</b>                                                                                                                                                                                                                                                                                                                                                                                                                                                                                                                                                                                        |

|     |                                                                                                                                                                                                                                                                                                                                                                                                                                                                                                                                                                                                                                                                                                                                                                                                                                                                                                                                                                                                                                                                                                                                                                                                                   |
|-----|-------------------------------------------------------------------------------------------------------------------------------------------------------------------------------------------------------------------------------------------------------------------------------------------------------------------------------------------------------------------------------------------------------------------------------------------------------------------------------------------------------------------------------------------------------------------------------------------------------------------------------------------------------------------------------------------------------------------------------------------------------------------------------------------------------------------------------------------------------------------------------------------------------------------------------------------------------------------------------------------------------------------------------------------------------------------------------------------------------------------------------------------------------------------------------------------------------------------|
| C.1 | <p>What acute physical discomfort were you having before you came to hospital? <b>[Check all that apply]</b></p> <ul style="list-style-type: none"> <li><input type="checkbox"/> Chest pain, pressure, tightness or other discomfort</li> <li><input type="checkbox"/> Dizziness</li> <li><input type="checkbox"/> Indigestion or stomach pain, pressure or other discomfort</li> <li><input type="checkbox"/> Nausea</li> <li><input type="checkbox"/> Pain or discomfort in neck, shoulder, arms or other discomfort</li> <li><input type="checkbox"/> Palpitation</li> <li><input type="checkbox"/> Shortness of breath</li> <li><input type="checkbox"/> Sweating</li> <li><input type="checkbox"/> Weakness or fatigue</li> <li><input type="checkbox"/> Confusion</li> <li><input type="checkbox"/> None</li> <li><input type="checkbox"/> Unknown</li> <li><input type="checkbox"/> Other symptom, please specify: _____</li> </ul> <p>“Symptom” here means the acute symptom that directly resulted in the admission of the patient, including both the symptom that had never happened before and the acute exacerbation of the existing symptom. Patient of selective admission should check “None”</p> |
| C.2 | <p><b>[if any acute symptoms]</b> When did the acute symptoms happen: _____(YYYY/MM/DD HH:MM) or ____hours before the admission    <input type="radio"/> Unknown</p>                                                                                                                                                                                                                                                                                                                                                                                                                                                                                                                                                                                                                                                                                                                                                                                                                                                                                                                                                                                                                                              |
| C.3 | <p><b>[if any acute symptoms]</b> When did you decide to go to hospital for help for the acute symptoms: _____(YYYY/MM/DD HH:MM) or ____hours before the admission    <input type="radio"/> Unknown</p>                                                                                                                                                                                                                                                                                                                                                                                                                                                                                                                                                                                                                                                                                                                                                                                                                                                                                                                                                                                                           |
| C.4 | <p><b>[if any acute symptoms]</b> After the onset of symptoms, did you wait for a while before seeking medical care<br/> <input type="radio"/> Yes    <input type="radio"/> No <b>[go to C6]</b>    <input type="radio"/> Don't Know <b>[go to C6]</b></p>                                                                                                                                                                                                                                                                                                                                                                                                                                                                                                                                                                                                                                                                                                                                                                                                                                                                                                                                                        |
| C.5 | <p><b>[If C4 yes]</b> What were the reason(s) that you decided to wait before seeking medical care?<br/> <b>[Check all that apply]</b></p> <ul style="list-style-type: none"> <li><input type="checkbox"/> Didn't have time to go to the doctor</li> <li><input type="checkbox"/> Symptoms did not seem bad enough for emergency care</li> <li><input type="checkbox"/> Symptoms would come and go over time (not persistent)</li> <li><input type="checkbox"/> Transportation – waited for someone to drive me to office/hospital</li> <li><input type="checkbox"/> A concerns about the cost</li> <li><input type="checkbox"/> Embarrassment or fear</li> <li><input type="checkbox"/> None</li> <li><input type="checkbox"/> Others, please specify: _____</li> </ul>                                                                                                                                                                                                                                                                                                                                                                                                                                          |

|      |                                                                                                                                                                                                                                                                                                                                                                                                                                                                                                                         |
|------|-------------------------------------------------------------------------------------------------------------------------------------------------------------------------------------------------------------------------------------------------------------------------------------------------------------------------------------------------------------------------------------------------------------------------------------------------------------------------------------------------------------------------|
| C.6  | <p><b>[if any acute symptoms]</b> When you first started having these symptoms, did you think that something was wrong with your heart?</p> <p><input type="radio"/> Yes   <input type="radio"/> No   <input type="radio"/> Didn't Know</p> <p>The purpose of the question is to identify the judgement of the patient to the symptom, instead of the doctor's diagnosis.</p>                                                                                                                                           |
| C.7  | <p><b>[if any acute symptoms]</b> After the symptom onset, did you take medicine before seeking medical care?</p> <p><input type="radio"/> Yes   <input type="radio"/> No <b>[go to D1]</b>   <input type="radio"/> Don't Know <b>[go to D1]</b></p> <p>The purpose of the question is to identify the medicine taken by the patient against the onset of the symptom without a prescription.</p>                                                                                                                       |
| C.8  | <p><b>[If C7 yes]</b> which kinds of medicine you have taken before seeking medical care? <b>[Check all that apply]</b></p> <p><input type="checkbox"/> Aspirin</p> <p><input type="checkbox"/> Nitrates</p> <p><input type="checkbox"/> TCM with nitrate</p> <p><input type="checkbox"/> TCM without nitrate</p> <p><input type="checkbox"/> Statins</p> <p><input type="checkbox"/> None</p> <p><input type="checkbox"/> Others, please specify:</p> <p><u>The medicine can be identified by its packing box.</u></p> |
| C.9  | <p>Have you ever been diagnosed as the following diseases? <b>[Check all that apply]</b></p> <p><input type="checkbox"/> CHD</p> <p><input type="checkbox"/> Hypertension</p> <p><input type="checkbox"/> Dyslipidemia</p> <p><input type="checkbox"/> DM</p> <p><input type="checkbox"/> Ischemic stroke</p> <p><input type="checkbox"/> hemorrhagic stroke</p> <p><input type="checkbox"/> Unclassified stroke</p> <p><input type="checkbox"/> None</p>                                                               |
| C.10 | <p>Before the administration, do you take the following medications routinely? <b>[Check all that apply]</b></p> <p><input type="checkbox"/> Aspirin</p> <p><input type="checkbox"/> Statins</p> <p><input type="checkbox"/> Beta blockers</p> <p><input type="checkbox"/> ACEI or ARB</p> <p><input type="checkbox"/> Nitrates</p> <p><input type="checkbox"/> CCB</p> <p><input type="checkbox"/> TCM</p> <p><input type="checkbox"/> None</p>                                                                        |

Statins include Lovastatin, Simvastatin, Pravastatin, Fluvastatin, Atorvastatin, Rosuvastatin, Pitavastatin, etc.  
 B-blockers include propranolol, atenolol, metoprolol, bisoprolol, nebivolol, nadolol, labetalol, Carvedilol, timolol, penbutolol, celiprolol, pindolol etc.  
 ACEI include captopril, enalapril, imidapril, benazepril, quinapril, cilazapril, ramipril, lisinopril, perindopril, fosinopril, zofenopril. Etc.  
 ARB include irbesartan, valsartan, losartan, telmisartan, candesartan, olmesartan, eprosartan, etc

#### D. CVD FUNCTIONAL STATUS (SAQ)

Please go over the activities listed below and indicate how much limitation you have had due to chest pain, chest tightness or angina over the 4 weeks before the admission this time?

|     | Physical Activity                                          | Extremely limited     | Quite a bit limited   | Moderately limited    | Slightly limited      | Not at all limited    | Limited for other reasons or did not do activity | Refuse to answer or unknown |
|-----|------------------------------------------------------------|-----------------------|-----------------------|-----------------------|-----------------------|-----------------------|--------------------------------------------------|-----------------------------|
| D.1 | Dressing yourself                                          | <input type="radio"/>                            | <input type="radio"/>       |
| D.2 | Walking indoors on level ground                            | <input type="radio"/>                            | <input type="radio"/>       |
| D.3 | Showering                                                  | <input type="radio"/>                            | <input type="radio"/>       |
| D.4 | Climbing a hill or a flight of stairs without stopping     | <input type="radio"/>                            | <input type="radio"/>       |
| D.5 | Gardening, vacuuming or carrying groceries                 | <input type="radio"/>                            | <input type="radio"/>       |
| D.6 | Walking more than a block at a brisk pace                  | <input type="radio"/>                            | <input type="radio"/>       |
| D.7 | Running or jogging                                         | <input type="radio"/>                            | <input type="radio"/>       |
| D.8 | Lifting or moving heavy objects (e.g. furniture, children) | <input type="radio"/>                            | <input type="radio"/>       |
| D.9 | Participating in strenuous sports (e.g. swimming, tennis)  | <input type="radio"/>                            | <input type="radio"/>       |

“4 weeks before” means condition in the 4 weeks before the interview, if the patient is forbidden from moving after PCI or CABG, then it can be altered by the condition in the 4 weeks before the procedure. The limitation of activities must result from the fearing of onset of angina, rather than other movement-limiting diseases.

D1 Example: can you face by yourself?

D3 Example: can you have a tub bath by yourself?

D5 Example: can you cook, do housework, go grocery shopping?

D6 Example: can you ride a bicycle?

D7 Example: can you have non-antagonistic exercises like dancing, gymnastics?

D8 Example: can you carry a baby or do farm work?

D9 Example: can you have antagonistic exercises like basketball?

- D.10 Compared with 4 weeks ago, how often do you have chest pain, chest tightness or angina when doing your most strenuous activities?
- ☐ Much more often
  - ☐ Slightly more often
  - ☐ About the same
  - ☐ Slightly less often
  - ☐ Much less often
  - ☐ None over the past 4 weeks
  - ☐ Refuse to answer or unknown

- D.11 Over the past 4 weeks, on average, how many times have you had chest pain, chest tightness or angina?
- ☐ ≥4 or more times per day
  - ☐ 1-3 times per day
  - ☐ 3-6 times per week
  - ☐ 1-2 times per week
  - ☐ Less than once a week
  - ☐ None over the past 4 weeks
  - ☐ Refuse to answer or unknown

The method of asking should be a step-wise question.to minimize the disturbance

- D.12 Over the past 4 weeks, on average, how many times have you had to take nitroglycerin?
- ☐ ≥4 or more times per day
  - ☐ 1-3 times per day
  - ☐ 3-6 times per week
  - ☐ 1-2 times per week
  - ☐ Less than once a week
  - ☐ None over the past 4 weeks
  - ☐ Refuse to answer or unknown

The method of asking should be a step-wise question.to minimize the disturbance

- D.13 How bothersome is it for you to take pills for chest pain, chest tightness or angina as prescribed?
- ☐ Extremely bothersome
  - ☐ Quite a bit bothersome
  - ☐ Moderately bothersome
  - ☐ Slightly bothersome
  - ☐ Not bothersome at all
  - ☐ My doctor has not prescribed pills
  - ☐ Refuse to answer or unknown
- D.14 How satisfied are you that everything possible is being done to treat your chest pain, chest tightness or angina?
- ☐ Not satisfied at all
  - ☐ Mostly dissatisfied
  - ☐ Somewhat satisfied
  - ☐ Mostly satisfied
  - ☐ Completely satisfied
  - ☐ Refuse to answer or unknown
- D.15 How satisfied are you with explanations your doctor has given about your chest pain, chest tightness or angina?
- ☐ Not satisfied at all
  - ☐ Mostly dissatisfied
  - ☐ Somewhat satisfied
  - ☐ Mostly satisfied
  - ☐ Completely satisfied
  - ☐ Refuse to answer or unknown
- D.16 Overall, how satisfied are you with the current treatment of your chest pain, chest tightness or angina?
- ☐ Not satisfied at all
  - ☐ Mostly dissatisfied
  - ☐ Somewhat satisfied
  - ☐ Mostly satisfied
  - ☐ Completely satisfied
  - ☐ Refuse to answer or unknown
- D.17 Over the past 4 weeks, how much has your chest pain, chest tightness or angina limited your enjoyment of life?
- ☐ Extremely limited
  - ☐ Quite a bit limited
  - ☐ Moderately limited
  - ☐ Slightly limited
  - ☐ Not limited at all
  - ☐ Refuse to answer or unknown

- D.18 If you had to spend the rest of your life with your chest pain, chest tightness or angina the way it is in the four weeks before this admission, how would you feel about this?
- Not satisfied at all
  - Mostly dissatisfied
  - Somewhat satisfied
  - Mostly satisfied
  - Completely satisfied
  - Refuse to answer or unknown
- D.19 How often do you think or worry that you may have a heart attack or die suddenly?
- I can't stop thinking or worrying about it
  - I often think or worry about it
  - I occasionally think or worry about it
  - I rarely think or worry about it
  - I never think or worry about it
  - Refuse to answer or unknown

#### **E. HEALTH-RELATED QUALITY OF LIFE (EQ-5D)**

**The following questions ask about your health state before the onset of the acute symptom this time. In each of the following categories, please indicate which statement best describes your own health state the week before the onset of the acute symptom this time.**

- E.1 Mobility
- I have **no** problems in walking about.
  - I have **some** problems in walking about.
  - I am **confined to bed**.
  - Refuse to answer or unknown
- E.2 Self-care
- I have **no** problems with self-care.
  - I have **some** problems washing or dressing myself.
  - I am **unable to wash or dress myself**.
  - Refuse to answer or unknown
- E.3 Usual activities (e.g., work, study, housework, family or leisure activities)
- I have **no** problems with performing my usual activities.
  - I have **some** problems with performing my usual activities.
  - I am **unable to perform my usual activities**.
  - Refuse to answer or unknown



E.4 Pain/discomfort  
☐ I have **no** pain or discomfort.  
☐ I have **moderate** pain or discomfort.  
☐ I have **extreme** pain or discomfort.  
☐ Refuse to answer or unknown

E.5 Anxiety/depression  
☐ I am **not** anxious or depressed.  
☐ I am **moderately** anxious or depressed.  
☐ I am **extremely** anxious or depressed.  
☐ Refuse to answer or unknown

E.6 Please **score** how good or bad your own health is the week before this admission. The best state you can imagine is 100 and the worst health state you can imagine is 0. Overall, how would you score your own health today between 0 and 100?  
☐ Refuse to answer  
Enter value between 0 and 100: \_ \_ \_  
Please avoid inducing or disturbing the patient (example: tell the patient that the passing score is 60) when asking this question

| F. DEPRESSION                                                                             |                                                                                                |                       |                       |                            |                       |                                   |
|-------------------------------------------------------------------------------------------|------------------------------------------------------------------------------------------------|-----------------------|-----------------------|----------------------------|-----------------------|-----------------------------------|
| Over the last 2 weeks, how often have you been bothered by any of the following problems? |                                                                                                |                       |                       |                            |                       |                                   |
|                                                                                           |                                                                                                | Not<br>at all         | Several<br>days       | More than half the<br>days | Nearly every<br>day   | Refuse to<br>answer or<br>unknown |
| F.1                                                                                       | Little interest or pleasure in doing things                                                    | <input type="radio"/> | <input type="radio"/> | <input type="radio"/>      | <input type="radio"/> | <input type="radio"/>             |
| F.2                                                                                       | Feeling down, depressed or hopeless                                                            | <input type="radio"/> | <input type="radio"/> | <input type="radio"/>      | <input type="radio"/> | <input type="radio"/>             |
| F.3                                                                                       | Trouble falling or staying asleep, or sleeping too much                                        | <input type="radio"/> | <input type="radio"/> | <input type="radio"/>      | <input type="radio"/> | <input type="radio"/>             |
| F.4                                                                                       | Feeling tired or having little energy                                                          | <input type="radio"/> | <input type="radio"/> | <input type="radio"/>      | <input type="radio"/> | <input type="radio"/>             |
| F.5                                                                                       | Poor appetite or overeating                                                                    | <input type="radio"/> | <input type="radio"/> | <input type="radio"/>      | <input type="radio"/> | <input type="radio"/>             |
| F.6                                                                                       | Feeling bad about yourself, or that you are a failure or have let yourself or your family down | <input type="radio"/> | <input type="radio"/> | <input type="radio"/>      | <input type="radio"/> | <input type="radio"/>             |
| F.7                                                                                       | Trouble concentrating on things, such as reading the newspaper or watching television          | <input type="radio"/> | <input type="radio"/> | <input type="radio"/>      | <input type="radio"/> | <input type="radio"/>             |

|                                                                                                                                                                                                                                                                                                                                                                                                                                                   |                                                                                                                                                                                                                                                                                                                                                                                                                                                                                                                                                                                                                                                                                                                                                                                                                                                                                        |                       |                       |                       |                       |                       |
|---------------------------------------------------------------------------------------------------------------------------------------------------------------------------------------------------------------------------------------------------------------------------------------------------------------------------------------------------------------------------------------------------------------------------------------------------|----------------------------------------------------------------------------------------------------------------------------------------------------------------------------------------------------------------------------------------------------------------------------------------------------------------------------------------------------------------------------------------------------------------------------------------------------------------------------------------------------------------------------------------------------------------------------------------------------------------------------------------------------------------------------------------------------------------------------------------------------------------------------------------------------------------------------------------------------------------------------------------|-----------------------|-----------------------|-----------------------|-----------------------|-----------------------|
| F.8                                                                                                                                                                                                                                                                                                                                                                                                                                               | Moving or speaking so slowly that other people could have noticed. Or the opposite – being so fidgety or restless that you have been moving around a lot more than usual                                                                                                                                                                                                                                                                                                                                                                                                                                                                                                                                                                                                                                                                                                               | <input type="radio"/> |
| <p>F1 Example: not interested in entertainment any more.<br/> F2 Example: feel listless when at work, having no confidence in being competent for the work.<br/> F3 Example: have insomnia and dreamful sleep.<br/> F4 Example: always tired, unwilling to move.<br/> F5 Example: feeling no appetite.<br/> F6 Example: lack self-confidence<br/> F7 Example: absent-minded<br/> F8 Example: people around you noticed your abnormal behavior</p> |                                                                                                                                                                                                                                                                                                                                                                                                                                                                                                                                                                                                                                                                                                                                                                                                                                                                                        |                       |                       |                       |                       |                       |
| <b>G. HEALTH CARE SERVICE</b>                                                                                                                                                                                                                                                                                                                                                                                                                     |                                                                                                                                                                                                                                                                                                                                                                                                                                                                                                                                                                                                                                                                                                                                                                                                                                                                                        |                       |                       |                       |                       |                       |
| G.1                                                                                                                                                                                                                                                                                                                                                                                                                                               | <p>In the past 12 months before this admission, have you ever been to TCM clinics or seen TCM doctors for heart problem?<br/> <input type="radio"/> No <b>[JUMP TO G4]</b>   <input type="radio"/> Yes   <input type="radio"/> Unknown <b>[JUMP TO G4]</b>   <input type="radio"/> Refuse to answer <b>[JUMP TO G4]</b><br/> Be certain that the patient visit a doctor for heart disease.</p>                                                                                                                                                                                                                                                                                                                                                                                                                                                                                         |                       |                       |                       |                       |                       |
| G.2                                                                                                                                                                                                                                                                                                                                                                                                                                               | <p><b>[IF G1 “YES”]</b> Which ones do you agree to? <b>[Check all that apply]</b></p> <ul style="list-style-type: none"> <li><input type="checkbox"/> The TCM doctors are easier to see</li> <li><input type="checkbox"/> My family has always used TCM</li> <li><input type="checkbox"/> Explanations from the TCM doctor are more satisfactory</li> <li><input type="checkbox"/> The TCM approaches are more effective</li> <li><input type="checkbox"/> The TCM approaches are safer</li> <li><input type="checkbox"/> The TCM approaches are less expensive</li> <li><input type="checkbox"/> I see TCM doctors just to recuperate</li> <li><input type="checkbox"/> None above</li> </ul> <p>The purpose of the question is to identify the reason that the patient prefer TCM clinics , in comparison with western medicine.</p>                                                 |                       |                       |                       |                       |                       |
| G.3                                                                                                                                                                                                                                                                                                                                                                                                                                               | <p><b>[IF G1 “YES”]</b> In what way do you think TCM therapies could be helpful for your heart problem? <b>[Check all that apply]</b></p> <ul style="list-style-type: none"> <li><input type="checkbox"/> Other diseases or disabilities</li> <li><input type="checkbox"/> Not specific</li> <li><input type="checkbox"/> Unknown</li> <li><input type="checkbox"/> High blood pressure control, please specify the name of medication:</li> <li><input type="checkbox"/> High blood cholesterol or lipid, please specify the name of medication:</li> <li><input type="checkbox"/> High blood sugar, please specify the name of medication:</li> <li><input type="checkbox"/> Chest pain, pressure, or tightness , please specify the name of medication:</li> </ul> <p>The purpose of the question is to identify the subjective impression of the patient to the effect of TCM.</p> |                       |                       |                       |                       |                       |

- G.4 When you got similar symptoms before this admission, which clinics or doctors did you go to?  
☐ I had no similar symptoms before    ☐ TCM alone    ☐ Mostly TCM by times  
☐ Mostly western medicine by times    ☐ Western medicine alone    ☐ TCM and western medicine equally by times    ☐ Unknown  
☐ Refuse to answer  
Be certain that the symptom of the patient results from heart disease.
- G.5 What types of medical insurance do you have? **[Check all that apply]**  
☐ Public health service  
☐ Medical insurance for urban workers/residents  
☐ Comprehensive arrangement for serious disease  
☐ Rural cooperative medical service  
☐ Other social medical insurance, please specify: \_\_\_\_\_  
☐ Commercial medical insurance  
☐ None  
☐ Unknown
- G.6 Before this index admission, the total medical expense during the past year is approximately \_\_\_\_\_.    ☐ Unknown    ☐ Refuse to answer
- G.7 Before this index admission, the medical expense paid out-of-pocket during the past year is approximately \_\_\_\_\_.    ☐ Unknown    ☐ Refuse to answer
- G.8 In the past 12 month, have you ever borrowed money from others to pay for medical expense (except ones that do not need to pay back)?  
☐ Yes    ☐ No    ☐ Unknown    ☐ Refuse to answer  
“Borrowed money ” means the money that you borrowed from other people or from banks, and need to be pay back
- G.9 In the past 12 month, have you ever avoided healthcare due to costs?  
☐ No    ☐ Yes    ☐ Unknown    ☐ Refuse to answer
- G.10 What do you think of the burden of medical expense mentioned above?  
☐ Cannot undertake    ☐ Almost undertake    ☐ Can undertake easily    ☐ Unknown    ☐ Refuse to answer

## H. SOCIOECONOMIC CHARACTER

|     |                                                                                                                                                                                                                                                                                                                                                                                                                                                                                                                                                                                                                                                                                                                                                                                                                                                                                                                                           |
|-----|-------------------------------------------------------------------------------------------------------------------------------------------------------------------------------------------------------------------------------------------------------------------------------------------------------------------------------------------------------------------------------------------------------------------------------------------------------------------------------------------------------------------------------------------------------------------------------------------------------------------------------------------------------------------------------------------------------------------------------------------------------------------------------------------------------------------------------------------------------------------------------------------------------------------------------------------|
| H.1 | <p>Your highest achieved education is:</p> <ul style="list-style-type: none"> <li>○ Illiteracy/semi-illiteracy</li> <li>○ Primary school</li> <li>○ Junior high school</li> <li>○ Senior high school (technical school or technical secondary school)</li> <li>○ College (junior college)</li> <li>○ Postgraduate</li> <li>○ Unknown</li> <li>○ Refuse to answer</li> </ul> <p>“Highest achieved education” means official education you are receiving/received in an standard school, including the graduates, the undergraduates and the campus students from various kinds of schools and colleges. If the patient did not receive official educations for specific reasons but have ever participated in standard continuation class, he/she will be regarded as having the same level of education. “Illiteracy/semi-illiteracy” means that the ability of literacy is less than 1500 words and cannot read or write daily note.</p> |
| H.2 | <p>Which of the following best describes your foreign language skills?</p> <ul style="list-style-type: none"> <li>○ I can use more than one foreign languages</li> <li>○ I can use one foreign language</li> <li>○ I know a little about foreign language</li> <li>○ I have learnt foreign language, but remember little now</li> <li>○ I have never learnt foreign language</li> <li>○ Unknown</li> <li>○ Refuse to answer</li> </ul> <p>The current ability of foreign language of the patient is required to be asked, the method of asking should refer to the education level of the patient and be a step-wise question.to minimize the disturbance</p>                                                                                                                                                                                                                                                                             |
| H.3 | <p>Your current job status:</p> <ul style="list-style-type: none"> <li>○ currently having a job</li> <li>○ used to have a job</li> <li>○ never have a job</li> <li>○ Unknown</li> <li>○ Refuse to answer</li> </ul> <p>The <b>current</b> job status is needed to be emphasized. A step-wise question is required to minimize the disturbance</p>                                                                                                                                                                                                                                                                                                                                                                                                                                                                                                                                                                                         |

|     |                                                                                                                                                                                                                                                                                                                                                                                                                                                                                                                                                                                                                                                   |
|-----|---------------------------------------------------------------------------------------------------------------------------------------------------------------------------------------------------------------------------------------------------------------------------------------------------------------------------------------------------------------------------------------------------------------------------------------------------------------------------------------------------------------------------------------------------------------------------------------------------------------------------------------------------|
| H.4 | <p><b>[If currently working or used to work]</b> What is/was your primary occupation:</p> <ul style="list-style-type: none"> <li><input type="radio"/> Farmer</li> <li><input type="radio"/> Worker</li> <li><input type="radio"/> Police/Administrative</li> <li><input type="radio"/> Clerical</li> <li><input type="radio"/> Medical related professional</li> <li><input type="radio"/> Non-medical related professional</li> <li><input type="radio"/> Business</li> <li><input type="radio"/> Self-employed</li> <li><input type="radio"/> Military</li> <li><input type="radio"/> Others</li> <li><input type="radio"/> Unknown</li> </ul> |
| H.5 | <p><b>[If currently working]</b> How often do you have to work during non-traditional working hours such as the evening or nights on average?</p> <p><input type="radio"/> 1 or more times/week   <input type="radio"/> 1-3 times/month   <input type="radio"/> Less than once/month   <input type="radio"/> Never   <input type="radio"/> Unknown   <input type="radio"/> Refuse to answer</p>                                                                                                                                                                                                                                                   |
| H.6 | <p><b>[If not currently working or never work]</b> What is the primary reason:</p> <ul style="list-style-type: none"> <li><input type="radio"/> Unemployed/laid-off</li> <li><input type="radio"/> Full-time homemaker</li> <li><input type="radio"/> Retired</li> <li><input type="radio"/> Unable to work</li> <li><input type="radio"/> Prefer not to work</li> <li><input type="radio"/> Unknown</li> <li><input type="radio"/> Refuse to answer</li> <li><input type="radio"/> Others, please specify:</li> </ul>                                                                                                                            |
| H.7 | <p>Current marital status:</p> <p><input type="radio"/> Married   <input type="radio"/> Divorced /Separated   <input type="radio"/> Widowed   <input type="radio"/> Single   <input type="radio"/> Unknown   <input type="radio"/> Refuse to answer</p> <p>“Married ”is supported by legal formalities of marriage or an traditional wedding ceremony and the spouse is alive. “Divorced /Separated” does not include the status of separated couples. “Widowed ” means that the spouse of the patient is dead and did not remarry. “Single” means p</p>                                                                                          |
| H.8 | <p>Including you, there are currently _ _ people living together in your family (sharing the household income in the last year)   <input type="radio"/> Refuse to answer</p> <p>“Living together” means sharing the same financial issues</p>                                                                                                                                                                                                                                                                                                                                                                                                     |
| H.9 | <p>Do you currently own a house or an apartment?</p> <p><input type="radio"/> Yes   <input type="radio"/> No   <input type="radio"/> Unknown   <input type="radio"/> Refuse to answer</p> <p>“Own a house” means owning the whole/part of the property of the house, with or without a debt</p>                                                                                                                                                                                                                                                                                                                                                   |

|                        |                                                                                                                                                                                                                                                                                                                                                                                                                                                                                                                                                                                                                                             |
|------------------------|---------------------------------------------------------------------------------------------------------------------------------------------------------------------------------------------------------------------------------------------------------------------------------------------------------------------------------------------------------------------------------------------------------------------------------------------------------------------------------------------------------------------------------------------------------------------------------------------------------------------------------------------|
| H.10                   | <p>Does your house have a private bathroom?</p> <p><input type="radio"/> Yes <input type="radio"/> No <input type="radio"/> Unknown <input type="radio"/> Refuse to answer</p> <p>If the house the patient is currently living has a private bathroom, then "Yes" should be checked</p>                                                                                                                                                                                                                                                                                                                                                     |
| H.11                   | <p>Do you currently have a private telephone (phone or mobile)?</p> <p><input type="radio"/> Yes <input type="radio"/> No <input type="radio"/> Unknown <input type="radio"/> Refuse to answer</p> <p>If the patient's house is not equipped with a fixed phone, but at least one of the family members owns a mobile phone, then "Yes" should be checked.</p>                                                                                                                                                                                                                                                                              |
| H.12                   | <p>Do you currently own a motor vehicle (tractor, motorcycle, electric vehicle, car)? <input type="radio"/> Yes <input type="radio"/> No <input type="radio"/> Unknown <input type="radio"/> Refuse to answer</p> <p>"Motor vehicle" means the patient owns a vehicles driven by mechanical power, with or without a debt.</p>                                                                                                                                                                                                                                                                                                              |
| H.13                   | <p>During the past 5 years, have you ever had self-paid travel(s)?</p> <p><input type="radio"/> Yes <input type="radio"/> No <input type="radio"/> Unknown <input type="radio"/> Refuse to answer</p> <p>"Self-paid travel(s)" means self-paid travel(s) to a distant place in a long time span and spend nights away, with a purpose of relaxation and sightseeing</p>                                                                                                                                                                                                                                                                     |
| H.14                   | <p>What was your total household income in the last year?</p> <p><input type="radio"/> &lt; ¥10000 <input type="radio"/> ¥10000 - 29999 <input type="radio"/> ¥30000 - 49999 <input type="radio"/> ¥50000 - 69999 <input type="radio"/> ¥70000 - 99999 <input type="radio"/> ≥ ¥100000 <input type="radio"/> Unknown <input type="radio"/> Refuse to answer</p> <p>"Household income" means the summation of the after-tax incomes of all family members. Stable amount of monthly salary can be used to calculate the yearly income, the income of unstable jobs (farmers for instance) can be altered by the income of the last year.</p> |
| <b>I. RISK FACTORS</b> |                                                                                                                                                                                                                                                                                                                                                                                                                                                                                                                                                                                                                                             |
| I.1                    | <p>In your father and brothers, did anyone have a heart attack, balloon angioplasty, stent or heart bypass surgery before his 55?</p> <p><input type="radio"/> Yes <input type="radio"/> No <input type="radio"/> Unknown <input type="radio"/> Refuse to answer</p> <p>"Father" means natural father, "brother" means natural brother or half-brother with a different mother or father.</p>                                                                                                                                                                                                                                               |
| I.2                    | <p>In your mother and sisters, did anyone have a heart attack, balloon angioplasty, stent or heart bypass surgery before her 65?</p> <p><input type="radio"/> Yes <input type="radio"/> No <input type="radio"/> Unknown <input type="radio"/> Refuse to answer</p> <p>"Mother" means natural mother, "sister" means natural sister or half-sister with a different mother or father</p>                                                                                                                                                                                                                                                    |
| I.3                    | <p>Which of the following best describes your current cigarette smoking status?</p> <p><input type="radio"/> Never smoked <b>[go to I6]</b></p> <p><input type="radio"/> I stopped smoking more than 1 year ago <b>[go to I6]</b></p> <p><input type="radio"/> I stopped smoking between 1 month and 1 year ago <b>[go to I6]</b></p> <p><input type="radio"/> Smoked in the past 30 days</p> <p><input type="radio"/> Unknown <b>[go to I6]</b></p> <p><input type="radio"/> Refuse to answer <b>[go to I6]</b></p> <p>"Smoking status" means smoking at least one cigarette (tobacco, hookah, or pipe)ever day</p>                        |

- I.4 **[If smoked in the past 30 days or stopped smoking more than 1 month ago]** On average you smoke \_\_ \_ cigarettes per day in the last month. ☐ Unknown ☐ Refuse to answer  
One pouch of tobacco, hookah, or pipe can be referred to be a cigarette.
- I.5 **[If smoked in the past 30 days or stopped smoking more than 1 month ago]** How old were you when you began smoking regularly?  
☐ Unknown ☐ Refuse to answer  
“Smoking regularly” means have at least one cigarette or one pouch of tobacco, hookah, or pipe
- I.6 During the past 1 year, how often do you have a drink containing alcohol?  
☐ Never **[go to I26]** ☐ Monthly or less ☐ 2 to 4 times a month ☐ 2 to 3 times a week ☐ 4 or more times a week ☐ Unknown  
**1 DRINK is 17ml pure alcohol, which equals to 120ml wine, or 360ml beer (half a bottle or 1 tin), or 45ml liquor (1 LIANG)**
- I.7 How many drinks containing alcohol do you have on a typical day when you are drinking?  
☐ 1 or 2 ☐ 3 or 4 ☐ 5 or 6 ☐ 7, 8, or 9 ☐ 10 or more ☐ Unknown ☐ Refuse to answer  
One unit means 17mL pure alcohol, about 120mL wine, 360mL beer, 100mL yellow wine and 45mL white wine

#### **J. OBSTRUCTIVE SLEEP APNEA SYNDROME (MBQ)**

- J.1 Do you snore?  
☐ Yes ☐ No **[go to J5]** ☐ Don't know **[go to J5]** ☐ Refuse to answer
- J.2 **[If Yes]** Your snoring is?  
☐ Slightly louder than breathing  
☐ As loud as talking  
☐ Louder than talking  
☐ Very loud can be heard in adjacent rooms  
☐ Refuse to answer or unknown
- J.3 **[If Yes]** How often do you snore?  
☐ Nearly never  
☐ 1-2 times per month  
☐ 1-2 times per week  
☐ 3-4 times per week  
☐ Nearly every day  
☐ Refuse to answer or unknown
- J.4 **[If Yes]** Has your snoring ever bothered other people?  
☐ Yes ☐ No ☐ Refuse to answer or unknown
- J.5-J.12 The frequency of onset of the following symptoms

|      |                                                                                                                                                                                                                                                              | Never                 | Nearly never          | 1-2 times / month     | 1-2 times / week      | 3-4 times / week      | Nearly every day      | Refuse to answer or unknown |
|------|--------------------------------------------------------------------------------------------------------------------------------------------------------------------------------------------------------------------------------------------------------------|-----------------------|-----------------------|-----------------------|-----------------------|-----------------------|-----------------------|-----------------------------|
| J.5  | Has anyone noticed that you quit breathing during your sleep?                                                                                                                                                                                                | <input type="radio"/>       |
| J.6  | Do you choke while you are sleeping?                                                                                                                                                                                                                         | <input type="radio"/>       |
| J.7  | How often do you feel tired or fatigued after your sleep?                                                                                                                                                                                                    | <input type="radio"/>       |
| J.8  | During your wake time do you feel tired, fatigued or not up to at par?                                                                                                                                                                                       | <input type="radio"/>       |
| J.9  | Have you ever fallen asleep while waiting in a line to meet your doctor?                                                                                                                                                                                     | <input type="radio"/>       |
| J.10 | Have you ever fallen asleep while watching television at your home during daytime?                                                                                                                                                                           | <input type="radio"/>       |
| J.11 | Have you ever fallen asleep while waiting in a line to pay your electricity and telephone bills?                                                                                                                                                             | <input type="radio"/>       |
| J.12 | How many hours do you typically sleep each night?<br><input type="radio"/> Less than 4 <input type="radio"/> 4-5 <input type="radio"/> 6-7 <input type="radio"/> 8-9 <input type="radio"/> 10-11 <input type="radio"/> >=12 <input type="radio"/> Don't know |                       |                       |                       |                       |                       |                       |                             |

| K. STRESS                                                                                                                                                                                                                                                                                                                                                                                                                                                                                                                                                                                                                                                  |                                                                                                               |                       |                       |                       |                       |                       |                             |
|------------------------------------------------------------------------------------------------------------------------------------------------------------------------------------------------------------------------------------------------------------------------------------------------------------------------------------------------------------------------------------------------------------------------------------------------------------------------------------------------------------------------------------------------------------------------------------------------------------------------------------------------------------|---------------------------------------------------------------------------------------------------------------|-----------------------|-----------------------|-----------------------|-----------------------|-----------------------|-----------------------------|
| <p>The questions in this scale ask about your thoughts and feelings during the last month. In each case, you will be asked to indicate how often you felt or thought a certain way. Although some of the questions are similar, there are differences between them and you should treat each one as a separate question. The best approach is to answer each question fairly quickly. That is, don't try to count up the number of times you felt a particular way, but rather indicate the alternative that seems most reasonable. For each question choose the following alternatives: never, almost never, sometimes, fairly often, and very often.</p> |                                                                                                               |                       |                       |                       |                       |                       |                             |
|                                                                                                                                                                                                                                                                                                                                                                                                                                                                                                                                                                                                                                                            |                                                                                                               | Never                 | Almost never          | Sometimes             | Fairly often          | Very often            | Refuse to answer or unknown |
| K.1                                                                                                                                                                                                                                                                                                                                                                                                                                                                                                                                                                                                                                                        | In the last month, how often have you felt that you were unable to control the important things in your life? | <input type="radio"/>       |



|     |                                                                                                                  |                       |                       |                       |                       |                       |                       |
|-----|------------------------------------------------------------------------------------------------------------------|-----------------------|-----------------------|-----------------------|-----------------------|-----------------------|-----------------------|
| K.2 | In the last month, how often have you felt confident in your ability to handle your personal problems?           | <input type="radio"/> |
| K.3 | In the last month, how often have you felt that things were going your way?                                      | <input type="radio"/> |
| K.4 | In the last month, how often have you felt difficulties were piling up so high that you could not overcome them? | <input type="radio"/> |

## L. SOCIAL SUPPORT

The following questions ask about other people who provide you with assistance and support.

|     |                                                                                                                            | None of the time      | A little of the time  | Some of the time      | Most of the time      | All of the time       | Refuse to answer or unknown |
|-----|----------------------------------------------------------------------------------------------------------------------------|-----------------------|-----------------------|-----------------------|-----------------------|-----------------------|-----------------------------|
| L.1 | Is there someone available to you whom you can count on to listen to you when you need to talk?                            | <input type="radio"/>       |
| L.2 | Is there someone available to you to give you good advice about a problem?                                                 | <input type="radio"/>       |
| L.3 | Is there someone available to you who shows you love and affection?                                                        | <input type="radio"/>       |
| L.4 | Is there someone available to you to help you with daily chores?                                                           | <input type="radio"/>       |
| L.5 | Can you count on anyone to provide you with emotional support (talking over problems or helping make difficult decisions)? | <input type="radio"/>       |
| L.6 | Do you have as much contact as you would like with someone you feel close to, someone in whom you can trust and confide?   | <input type="radio"/>       |

L1 Example: Is there anyone who would like to listen to you when you want to have a conversation?

L2 Example: Is there anyone who would help you with your trouble?

L3 Example: Do your family and friends care about you?

L4 Example: Is there anyone who would help you with your housework?

L5 Example: Is there anyone who would help you to make decisions?

L6 Example: Do you always chat with your family and friendS?

#### **X. PHYSICAL MEASUREMENTS**

X.1 Height: \_\_\_\_ cm    ☐ Unmeasured

X.2 Weight: \_\_\_\_ kg    ☐ Unmeasured

X.3 Waistline: \_\_\_\_ cm    ☐ Unmeasured

## 1 Month Follow-up Interview

|                                  |                                                                                                                                                         |
|----------------------------------|---------------------------------------------------------------------------------------------------------------------------------------------------------|
| <b>A. BASIC INFORMATION</b>      |                                                                                                                                                         |
| A.1                              | Type of follow-up:<br><input type="radio"/> Face-to-face interview<br><input type="radio"/> Telephone interview <b>[go to A4]</b>                       |
| A.2                              | Was bio-sample collected?<br><input type="radio"/> No <input type="radio"/> Yes                                                                         |
| A.3                              | ID of bio-sample: _____ <b>[go to B1]</b>                                                                                                               |
| A.4                              | Did the participant answered the telephone interview by him/herself?<br><input type="radio"/> Yes <input type="radio"/> No, who: ____ <b>[go to C1]</b> |
| <b>B. FOLLOW-UP MEASUREMENTS</b> |                                                                                                                                                         |
| B.1                              | Weight: ____ kg <input type="radio"/> Unmeasured                                                                                                        |
| B.2                              | Waistline: ____ cm <input type="radio"/> Unmeasured                                                                                                     |
| B.3                              | Blood pressure 1 <sup>st</sup> : ____/____mmHg                                                                                                          |
| B.4                              | Blood pressure 2 <sup>nd</sup> : ____/____mmHg                                                                                                          |
| B.5                              | <b>[if difference between 1<sup>st</sup> and 2<sup>nd</sup> &gt;5mmHg]</b> Blood pressure 3 <sup>rd</sup> : ____/____mmHg ()                            |
| B.6                              | ID of bio-sample: _____                                                                                                                                 |
| <b>C. OUTCOMES</b>               |                                                                                                                                                         |
| <b>Admission note 1</b>          |                                                                                                                                                         |
| C.1                              | Date of hospitalization: __/__/____ <input type="radio"/> Unknown                                                                                       |
| C.2                              | Name of the hospital: _____                                                                                                                             |
| C.3                              | Admission status:<br><input type="radio"/> Emergency <input type="radio"/> Scheduled <input type="radio"/> Unknown                                      |

C.4 Main reason for hospitalization:

- ☐ MI ☐ Unstable angina pectoris ☐ Stable angina pectoris ☐ Valve dysfunction
- ☐ Arrhythmia ☐ Heart failure ☐ New ischemic stroke ☐ New hemorrhagic stroke
- ☐ Transient ischemic attack ☐ Diabetes ☐ Kidney disease
- ☐ Cardiac surgery related infections ☐ Pericardial effusion or tamponade
- ☐ Pulmonary embolism ☐ Bleeding except hemorrhagic stroke ☐ Others ☐ Unknown

C.5 Therapies in hospitalization duration **[Check all that apply]:**

- ☐ PCI ☐ CABG ☐ Thrombolysis ☐ Coronary angiography
- ☐ Stroke thrombolysis ☐ Valve surgery ☐ LV assist device
- ☐ Pacemaker or defibrillator implantation ☐ Pulmonary embolism thrombolysis ☐ Dialysis
- ☐ Cardiopulmonary resuscitation ☐ None above

C.6 Supportive documents were collected:

- ☐ Face sheet
- ☐ Discharge summary
- ☐ CAG report
- ☐ CAG image
- ☐ CABG report
- ☐ PCI report
- ☐ CT report
- ☐ MRI report
- ☐ None above

**Admission note 2**

C.7 Date of hospitalization: \_\_/\_\_/\_\_\_\_ ☐ Unknown

C.8 Name of the hospital: \_\_\_\_\_

C.9 Admission status:

- ☐ Emergency ☐ Scheduled ☐ Unknown

C.10 Main reason for hospitalization:

- ☐ MI ☐ Unstable angina pectoris ☐ Stable angina pectoris ☐ Valve dysfunction
- ☐ Arrhythmia ☐ Heart failure ☐ New ischemic stroke ☐ New hemorrhagic stroke
- ☐ Transient ischemic attack ☐ Diabetes ☐ Kidney disease
- ☐ Cardiac surgery related infections ☐ Pericardial effusion or tamponade
- ☐ Pulmonary embolism ☐ Bleeding except hemorrhagic stroke ☐ Others ☐ Unknown

|                     |                                                                                                                                                                                                                                                                                                                                                                                                                                                                                                                                                                                                                                                            |
|---------------------|------------------------------------------------------------------------------------------------------------------------------------------------------------------------------------------------------------------------------------------------------------------------------------------------------------------------------------------------------------------------------------------------------------------------------------------------------------------------------------------------------------------------------------------------------------------------------------------------------------------------------------------------------------|
| C.11                | Therapies in hospitalization duration <b>[Check all that apply]:</b><br><input type="checkbox"/> PCI <input type="checkbox"/> CABG <input type="checkbox"/> Thrombolysis <input type="checkbox"/> Coronary angiography<br><input type="checkbox"/> Stroke thrombolysis <input type="checkbox"/> Valve surgery <input type="checkbox"/> LV assist device<br><input type="checkbox"/> Pacemaker or defibrillator implantation <input type="checkbox"/> Pulmonary embolism thrombolysis <input type="checkbox"/> Dialysis<br><input type="checkbox"/> Cardiopulmonary resuscitation <input type="checkbox"/> None above                                       |
| C.12                | Supportive documents were collected:<br><input type="checkbox"/> Face sheet<br><input type="checkbox"/> Discharge summary<br><input type="checkbox"/> CAG report<br><input type="checkbox"/> CAG imagine<br><input type="checkbox"/> CABG report<br><input type="checkbox"/> PCI report<br><input type="checkbox"/> CT report<br><input type="checkbox"/> MRI report<br><input type="checkbox"/> None above                                                                                                                                                                                                                                                |
| <b>D. ADHERENCE</b> |                                                                                                                                                                                                                                                                                                                                                                                                                                                                                                                                                                                                                                                            |
| D.1                 | In the past month, how often did you forget to take one or more of your prescribed medications?<br><input type="radio"/> No prescribed medication <b>[JUMP TO E1]</b> <input type="radio"/> Never <input type="radio"/> Once<br><input type="radio"/> 2-3 times <input type="radio"/> Once per week <input type="radio"/> 2-5 times per week<br><input type="radio"/> Every day or nearly every day <input type="radio"/> Unknown <input type="radio"/> Refuse to answer                                                                                                                                                                                   |
| D.2                 | In the past month, how often did you miss a dose of <u>ASPIRIN</u> ?<br><input type="radio"/> No prescribed this medication <b>[JUMP TO D4]</b> <input type="radio"/> Never <b>[JUMP TO D4]</b> <input type="radio"/> Once<br><input type="radio"/> 2-3 times <input type="radio"/> Once per week <input type="radio"/> 2-5 times per week<br><input type="radio"/> Everyday or nearly everyday <input type="radio"/> Unknown <b>[JUMP TO D4]</b> <input type="radio"/> Refuse to answer <b>[JUMP TO D4]</b>                                                                                                                                               |
| D.3                 | <b>[If you have ever missed a dose of <u>ASPIRIN</u>]</b> The main reason is...<br><input type="radio"/> I Forgot to take it unintentionally<br><input type="radio"/> Doctors told me to stop taking it<br><input type="radio"/> I began feeling better, believed it was unnecessary to take it everyday<br><input type="radio"/> The drug seemed ineffective<br><input type="radio"/> I was worried about adverse reaction<br><input type="radio"/> I couldn't afford it<br><input type="radio"/> I couldn't access it easily<br><input type="radio"/> Others, please specify:<br><input type="radio"/> Unknown<br><input type="radio"/> Refuse to answer |

- D.4 In the past month, how often did you decide to skip CLOPIDOGREL?  
☐ No prescribed this medication **[JUMP TO D6]** ☐ Never **[JUMP TO D6]** ☐ Once  
☐ 2-3 times ☐ Once per week ☐ 2-5 times per week  
☐ Everyday or nearly everyday ☐ Unknown **[JUMP TO D6]** ☐ Refuse to answer **[JUMP TO D6]**
- D.5 **[If you have ever missed a dose of CLOPIDOGREL] The main reason is...**  
☐ I Forgot to take it unintentionally  
☐ Doctors told me to stop taking it  
☐ I began feeling better, believed it was unnecessary to take it everyday  
☐ The drug seemed ineffective  
☐ I was worried about adverse reaction  
☐ I couldn't afford it  
☐ I couldn't access it easily  
☐ Others, please specify:  
☐ Unknown  
☐ Refuse to answer
- D.6 In the past month, how often did you decide to skip STATINS?  
☐ No prescribed this medication **[JUMP TO D9]** ☐ Never **[JUMP TO D9]** ☐ Once  
☐ 2-3 times ☐ Once per week ☐ 2-5 times per week  
☐ Everyday or nearly everyday ☐ Unknown **[JUMP TO D9]** ☐ Refuse to answer **[JUMP TO D9]**
- D.7 The drug name and dosage: \_\_\_\_\_
- D.8 **[If you have ever missed a dose of STATINS] The main reason is...**  
☐ I Forgot to take it unintentionally  
☐ Doctors told me to stop taking it  
☐ I began feeling better, believed it was unnecessary to take it everyday  
☐ The drug seemed ineffective  
☐ I was worried about adverse reaction  
☐ I couldn't afford it  
☐ I couldn't access it easily  
☐ Others, please specify:  
☐ Unknown  
☐ Refuse to answer
- D.9 In the past month, how often did you decide to skip BETA-BLOCKERS?  
☐ No prescribed this medication **[JUMP TO D12]** ☐ Never **[JUMP TO D12]** ☐ Once  
☐ 2-3 times ☐ Once per week ☐ 2-5 times per week  
☐ Everyday or nearly everyday ☐ Unknown **[JUMP TO D12]** ☐ Refuse to answer **[JUMP TO D12]**
- D.10 The drug name and dosage: \_\_\_\_\_

|                                                                                                                                                                            |                                                                                                                                                                                                                                                                                                                                                                                                                                                                                                                                                                                                                                                                                                                                                                              |                           |                       |                         |                          |                                                              |                                |
|----------------------------------------------------------------------------------------------------------------------------------------------------------------------------|------------------------------------------------------------------------------------------------------------------------------------------------------------------------------------------------------------------------------------------------------------------------------------------------------------------------------------------------------------------------------------------------------------------------------------------------------------------------------------------------------------------------------------------------------------------------------------------------------------------------------------------------------------------------------------------------------------------------------------------------------------------------------|---------------------------|-----------------------|-------------------------|--------------------------|--------------------------------------------------------------|--------------------------------|
| D.11                                                                                                                                                                       | <p><b>[If you have ever missed a dose of <u>BETA-BLOCKERS</u>] The main reason is...</b></p> <ul style="list-style-type: none"> <li><input type="radio"/> I Forgot to take it unintentionally</li> <li><input type="radio"/> Doctors told me to stop taking it</li> <li><input type="radio"/> I began feeling better, believed it was unnecessary to take it everyday</li> <li><input type="radio"/> The drug seemed ineffective</li> <li><input type="radio"/> I was worried about adverse reaction</li> <li><input type="radio"/> I couldn't afford it</li> <li><input type="radio"/> I couldn't access it easily</li> <li><input type="radio"/> Others, please specify:</li> <li><input type="radio"/> Unknown</li> <li><input type="radio"/> Refuse to answer</li> </ul> |                           |                       |                         |                          |                                                              |                                |
| D.12                                                                                                                                                                       | <p>In the past month, how often did you decide to skip <u>ACEI/ARBs</u>?</p> <ul style="list-style-type: none"> <li><input type="radio"/> No prescribed this medication <b>[JUMP TO E1]</b></li> <li><input type="radio"/> Never <b>[JUMP TO E1]</b></li> <li><input type="radio"/> Once</li> <li><input type="radio"/> 2-3 times</li> <li><input type="radio"/> Once per week</li> <li><input type="radio"/> 2-5 times per week</li> <li><input type="radio"/> Everyday or nearly everyday</li> <li><input type="radio"/> Unknown <b>[JUMP TO E1]</b></li> <li><input type="radio"/> Refuse to answer <b>[JUMP TO E1]</b></li> </ul>                                                                                                                                        |                           |                       |                         |                          |                                                              |                                |
| D.13                                                                                                                                                                       | <p>The drug name and dosage: _____</p>                                                                                                                                                                                                                                                                                                                                                                                                                                                                                                                                                                                                                                                                                                                                       |                           |                       |                         |                          |                                                              |                                |
| D.14                                                                                                                                                                       | <p><b>[If you have ever missed a dose of <u>ACEI/ARBs</u>] The main reason is...</b></p> <ul style="list-style-type: none"> <li><input type="radio"/> I Forgot to take it unintentionally</li> <li><input type="radio"/> Doctors told me to stop taking it</li> <li><input type="radio"/> I began feeling better, believed it was unnecessary to take it everyday</li> <li><input type="radio"/> The drug seemed ineffective</li> <li><input type="radio"/> I was worried about adverse reaction</li> <li><input type="radio"/> I couldn't afford it</li> <li><input type="radio"/> I couldn't access it easily</li> <li><input type="radio"/> Others, please specify:</li> <li><input type="radio"/> Unknown</li> <li><input type="radio"/> Refuse to answer</li> </ul>     |                           |                       |                         |                          |                                                              |                                |
| <b>E. CVD FUNCTIONAL STATUS (SAQ)</b>                                                                                                                                      |                                                                                                                                                                                                                                                                                                                                                                                                                                                                                                                                                                                                                                                                                                                                                                              |                           |                       |                         |                          |                                                              |                                |
| <p><b>Please go over the activities listed below and indicate how much limitation you have had due to chest pain ,chest tightness or angina over the past 4 weeks?</b></p> |                                                                                                                                                                                                                                                                                                                                                                                                                                                                                                                                                                                                                                                                                                                                                                              |                           |                       |                         |                          |                                                              |                                |
| Physical Activity                                                                                                                                                          | Extremel<br>y limited                                                                                                                                                                                                                                                                                                                                                                                                                                                                                                                                                                                                                                                                                                                                                        | Quite<br>a bit<br>limited | Moderately<br>limited | Slightl<br>y<br>limited | Not at<br>all<br>limited | Limited for<br>other<br>reasons or<br>did not do<br>activity | Refuse to answer or<br>unknown |

|      |                                                                                                                                                                                                                                                                                                                                                                                                                                                                                            |                       |                       |                       |                       |                       |                       |                       |
|------|--------------------------------------------------------------------------------------------------------------------------------------------------------------------------------------------------------------------------------------------------------------------------------------------------------------------------------------------------------------------------------------------------------------------------------------------------------------------------------------------|-----------------------|-----------------------|-----------------------|-----------------------|-----------------------|-----------------------|-----------------------|
| E.1  | Dressing yourself                                                                                                                                                                                                                                                                                                                                                                                                                                                                          | <input type="radio"/> |
| E.2  | Walking indoors on level ground                                                                                                                                                                                                                                                                                                                                                                                                                                                            | <input type="radio"/> |
| E.3  | Showering                                                                                                                                                                                                                                                                                                                                                                                                                                                                                  | <input type="radio"/> |
| E.4  | Climbing a hill or a flight of stairs without stopping                                                                                                                                                                                                                                                                                                                                                                                                                                     | <input type="radio"/> |
| E.5  | Gardening, vacuuming or carrying groceries                                                                                                                                                                                                                                                                                                                                                                                                                                                 | <input type="radio"/> |
| E.6  | Walking more than a block at a brisk pace                                                                                                                                                                                                                                                                                                                                                                                                                                                  | <input type="radio"/> |
| E.7  | Running or jogging                                                                                                                                                                                                                                                                                                                                                                                                                                                                         | <input type="radio"/> |
| E.8  | Lifting or moving heavy objects (e.g. furniture, children)                                                                                                                                                                                                                                                                                                                                                                                                                                 | <input type="radio"/> |
| E.9  | Participating in strenuous sports (e.g. swimming, tennis)                                                                                                                                                                                                                                                                                                                                                                                                                                  | <input type="radio"/> |
| E.10 | <p>Compared with 4 weeks ago, how often do you have chest pain, chest tightness or angina when doing your most strenuous activities?</p> <p><input type="radio"/> Much more often   <input type="radio"/> Slightly more often   <input type="radio"/> About the same   <input type="radio"/> Slightly less often   <input type="radio"/> Much less often   <input type="radio"/> None over the past 4 weeks   <input type="radio"/> Refuse to answer or unknown</p>                        |                       |                       |                       |                       |                       |                       |                       |
| E.11 | <p>Over the past 4 weeks, on average, how many times have you had chest pain, chest tightness or angina?</p> <p><input type="radio"/> <math>\geq 4</math> or more times per day<br/> <input type="radio"/> 1-3 times per day<br/> <input type="radio"/> 3-6 times per week<br/> <input type="radio"/> 1-2 times per week<br/> <input type="radio"/> Less than once a week<br/> <input type="radio"/> None over the past 4 weeks<br/> <input type="radio"/> Refuse to answer or unknown</p> |                       |                       |                       |                       |                       |                       |                       |
| E.12 | <p>Over the past 4 weeks, on average, how many times have you had to take nitroglycerin?</p> <p><input type="radio"/> <math>\geq 4</math> or more times per day<br/> <input type="radio"/> 1-3 times per day</p>                                                                                                                                                                                                                                                                           |                       |                       |                       |                       |                       |                       |                       |



- 3-6 times per week
  - 1-2 times per week
  - Less than once a week
  - None over the past 4 weeks
  - Refuse to answer or unknown
- E.13 How bothersome is it for you to take pills for chest pain, chest tightness or angina as prescribed?
- Extremely bothersome
  - Quite a bit bothersome
  - Moderately bothersome
  - Slightly bothersome
  - Not bothersome at all
  - My doctor has not prescribed pills
  - Refuse to answer or unknown
- E.14 How satisfied are you that everything possible is being done to treat your chest pain, chest tightness or angina?
- Not satisfied at all
  - Mostly dissatisfied
  - Somewhat satisfied
  - Mostly satisfied
  - Completely satisfied
  - Refuse to answer or unknown
- E.15 How satisfied are you with explanations your doctor has given about your chest pain, chest tightness or angina?
- Not satisfied at all
  - Mostly dissatisfied
  - Somewhat satisfied
  - Mostly satisfied
  - Completely satisfied
  - Refuse to answer or unknown
- E.16 Overall, how satisfied are you with the current treatment of your chest pain, chest tightness or angina?
- Not satisfied at all
  - Mostly dissatisfied
  - Somewhat satisfied
  - Mostly satisfied
  - Completely satisfied
  - Refuse to answer or unknown
- E.17 Over the past 4 weeks, how much has your chest pain, chest tightness or angina limited your enjoyment of life?
- Extremely limited
  - Quite a bit limited
  - Moderately limited
  - Slightly limited
  - Not limited at all
  - Refuse to answer or unknown

- E.18 If you had to spend the rest of your life with your chest pain, chest tightness or angina the way it is right now, how would you feel about this?
- ☐ Not satisfied at all
  - ☐ Mostly dissatisfied
  - ☐ Somewhat satisfied
  - ☐ Mostly satisfied
  - ☐ Completely satisfied
  - ☐ Refuse to answer or unknown
- E.19 How often do you think or worry that you may have a heart attack or die suddenly?
- ☐ I can't stop thinking or worrying about it
  - ☐ I often think or worry about it
  - ☐ I occasionally think or worry about it
  - ☐ I rarely think or worry about it
  - ☐ I never think or worry about it
  - ☐ Refuse to answer or unknown

#### F. HEALTH-RELATED QUALITY OF LIFE (EQ-5D)

The following questions ask about your current health state. In each of the following categories, please indicate which statement best describes your own health state today.

- F.1 Mobility
- ☐ I have **no** problems in walking about.
  - ☐ I have **some** problems in walking about.
  - ☐ I am **confined to bed**.
  - ☐ Refuse to answer or unknown
- F.2 Self-care
- ☐ I have **no** problems with self-care.
  - ☐ I have **some** problems washing or dressing myself.
  - ☐ I am **unable to wash or dress myself**.
  - ☐ Refuse to answer or unknown
- F.3 Usual activities (e.g., work, study, housework, family or leisure activities)
- ☐ I have **no** problems with performing my usual activities.
  - ☐ I have **some** problems with performing my usual activities.
  - ☐ I am **unable to perform my usual activities**.
  - ☐ Refuse to answer or unknown
- F.4 Pain/discomfort
- ☐ I have **no** pain or discomfort.

☐ I have **moderate** pain or discomfort.  
☐ I have **extreme** pain or discomfort.  
☐ Refuse to answer or unknown

F.5 Anxiety/depression  
☐ I am **not** anxious or depressed.  
☐ I am **moderately** anxious or depressed.  
☐ I am **extremely** anxious or depressed.  
☐ Refuse to answer or unknown

F.6 Please **score** how good or bad your own health is today. The best state you can imagine is 100 and the worst health state you can imagine is 0. Overall, how would you score your own health today between 0 and 100?  
 Enter value between 0 and 100: \_ \_ \_ ☐ Refuse to answer

**G. DEPRESSION**

| Over the last 2 weeks, how often have you been bothered by any of the following problems? |                                                                                                                                                                          |                       |                       |                               |                        |                                |
|-------------------------------------------------------------------------------------------|--------------------------------------------------------------------------------------------------------------------------------------------------------------------------|-----------------------|-----------------------|-------------------------------|------------------------|--------------------------------|
|                                                                                           |                                                                                                                                                                          | Not at all            | Severa<br>l days      | More than<br>half the<br>days | Nearly<br>every<br>day | Refuse to answer or<br>unknown |
| G.1                                                                                       | Little interest or pleasure in doing things                                                                                                                              | <input type="radio"/> | <input type="radio"/> | <input type="radio"/>         | <input type="radio"/>  | <input type="radio"/>          |
| G.2                                                                                       | Feeling down, depressed or hopeless                                                                                                                                      | <input type="radio"/> | <input type="radio"/> | <input type="radio"/>         | <input type="radio"/>  | <input type="radio"/>          |
| G.3                                                                                       | Trouble falling or staying asleep, or sleeping too much                                                                                                                  | <input type="radio"/> | <input type="radio"/> | <input type="radio"/>         | <input type="radio"/>  | <input type="radio"/>          |
| G.4                                                                                       | Feeling tired or having little energy                                                                                                                                    | <input type="radio"/> | <input type="radio"/> | <input type="radio"/>         | <input type="radio"/>  | <input type="radio"/>          |
| G.5                                                                                       | Poor appetite or overeating                                                                                                                                              | <input type="radio"/> | <input type="radio"/> | <input type="radio"/>         | <input type="radio"/>  | <input type="radio"/>          |
| G.6                                                                                       | Feeling bad about yourself, or that you are a failure or have let yourself or your family down                                                                           | <input type="radio"/> | <input type="radio"/> | <input type="radio"/>         | <input type="radio"/>  | <input type="radio"/>          |
| G.7                                                                                       | Trouble concentrating on things, such as reading the newspaper or watching television                                                                                    | <input type="radio"/> | <input type="radio"/> | <input type="radio"/>         | <input type="radio"/>  | <input type="radio"/>          |
| G.8                                                                                       | Moving or speaking so slowly that other people could have noticed. Or the opposite – being so fidgety or restless that you have been moving around a lot more than usual | <input type="radio"/> | <input type="radio"/> | <input type="radio"/>         | <input type="radio"/>  | <input type="radio"/>          |

**H. STRESS**

The questions in this scale ask about your thoughts and feelings during the last month. In each case, you will be asked to indicate how often you felt or thought a certain way. Although some of the questions are similar, there are differences between them and you should treat each one as a separate question. The best approach is to answer each question fairly quickly. That is, don't try to count up the number of times you felt a particular way, but rather indicate the alternative that seems most reasonable. For each question choose the following alternatives: never, almost never, sometimes, fairly often, and very often.

|     |                                                                                                                  | Never                 | Almost never          | Sometimes             | Fairly often          | Very often            | Refuse to answer or unknown |
|-----|------------------------------------------------------------------------------------------------------------------|-----------------------|-----------------------|-----------------------|-----------------------|-----------------------|-----------------------------|
| H.1 | In the last month, how often have you felt that you were unable to control the important things in your life?    | <input type="radio"/>       |
| H.2 | In the last month, how often have you felt confident in your ability to handle your personal problems?           | <input type="radio"/>       |
| H.3 | In the last month, how often have you felt that things were going your way?                                      | <input type="radio"/>       |
| H.4 | In the last month, how often have you felt difficulties were piling up so high that you could not overcome them? | <input type="radio"/>       |

**N. LAB TESTS**

- N.1 TC: \_\_\_\_ ☐ Unmeasured
- N.2 HDL-C: \_\_\_\_ ☐ Unmeasured
- N.3 LDL-C: \_\_\_\_ ☐ Unmeasured
- N.4 Blood glucose: \_\_\_\_ ☐ Unmeasured
- N.5 ALT: \_\_\_\_ ☐ Unmeasured
- N.6 Cr: \_\_\_\_ ☐ Unmeasured

- N.7 BUN: \_\_\_\_ ☐ Unmeasured
- N.8 CK: \_\_\_\_ ☐ Unmeasured
- N.9 hsCRP: \_\_\_\_ ☐ Unmeasured
- N.10 Hb: \_\_\_\_ ☐ Unmeasured
- N.11 HCT: \_\_\_\_ ☐ Unmeasured
- N.12 WBC: \_\_\_\_ ☐ Unmeasured
- N.13 PLT: \_\_\_\_ ☐ Unmeasured
- N.14 OB: \_\_\_\_ ☐ Unmeasured
- N.15 PRO: \_\_\_\_ ☐ Unmeasured

## 6 Month Follow-up Interview

### A. BASIC INFORMATION

Type of follow-up:

- ☐ Face-to-face interview
- ☐ Telephone interview

Did the participant answered the telephone interview by him/herself?

- ☐ Yes
- ☐ No, who: \_\_\_\_ **[go to C1]**

### B. FOLLOW-UP MEASUREMENTS

Weight: \_\_\_\_ kg ☐ Unmeasured

Waistline: \_\_\_\_ cm ☐ Unmeasured

Blood pressure 1<sup>st</sup>: \_\_\_\_/\_\_\_\_mmHg

Blood pressure 2<sup>nd</sup>: \_\_\_\_/\_\_\_\_mmHg

**[if difference between 1<sup>st</sup> and 2<sup>nd</sup> >5mmHg]** Blood pressure 3<sup>rd</sup>: \_\_\_\_/\_\_\_\_mmHg ()

### C. OUTCOMES

#### Admission note 1

C.1 Date of hospitalization: \_\_/\_\_/\_\_\_\_ ☐ Unknown

C.2 Name of the hospital: \_\_\_\_\_

C.3 Admission status:

- ☐ Emergency
- ☐ Scheduled
- ☐ Unknown

C.4 Main reason for hospitalization:

- ☐ MI
- ☐ Unstable angina pectoris
- ☐ Stable angina pectoris
- ☐ Valve dysfunction
- ☐ Arrhythmia
- ☐ Heart failure
- ☐ New ischemic stroke
- ☐ New hemorrhagic stroke
- ☐ Transient ischemic attack
- ☐ Diabetes
- ☐ Kidney disease
- ☐ Cardiac surgery related infections
- ☐ Pericardial effusion or tamponade
- ☐ Pulmonary embolism
- ☐ Bleeding except hemorrhagic stroke
- ☐ Others
- ☐ Unknown

|      |                                                                                                                                                                                                                                                                                                                                                                                                                                                                                                                                                                                                                                                                                                                                                                            |
|------|----------------------------------------------------------------------------------------------------------------------------------------------------------------------------------------------------------------------------------------------------------------------------------------------------------------------------------------------------------------------------------------------------------------------------------------------------------------------------------------------------------------------------------------------------------------------------------------------------------------------------------------------------------------------------------------------------------------------------------------------------------------------------|
| C.5  | Therapies in hospitalization duration <b>[Check all that apply]:</b><br><input type="checkbox"/> PCI <input type="checkbox"/> CABG <input type="checkbox"/> Thrombolysis <input type="checkbox"/> Coronary angiography<br><input type="checkbox"/> Stroke thrombolysis <input type="checkbox"/> Valve surgery <input type="checkbox"/> LV assist device<br><input type="checkbox"/> Pacemaker or defibrillator implantation <input type="checkbox"/> Pulmonary embolism thrombolysis <input type="checkbox"/> Dialysis<br><input type="checkbox"/> Cardiopulmonary resuscitation <input type="checkbox"/> None above                                                                                                                                                       |
| H.5  | Supportive documents were collected:<br><input type="checkbox"/> Face sheet<br><input type="checkbox"/> Discharge summary<br><input type="checkbox"/> CAG report<br><input type="checkbox"/> CAG imagine<br><input type="checkbox"/> CABG report<br><input type="checkbox"/> PCI report<br><input type="checkbox"/> CT report<br><input type="checkbox"/> MRI report<br><input type="checkbox"/> None above<br><br><b>Admission note 2</b>                                                                                                                                                                                                                                                                                                                                 |
| C.6  | Date of hospitalization: __/__/____ <input type="radio"/> Unknown                                                                                                                                                                                                                                                                                                                                                                                                                                                                                                                                                                                                                                                                                                          |
| C.7  | Name of the hospital: _____                                                                                                                                                                                                                                                                                                                                                                                                                                                                                                                                                                                                                                                                                                                                                |
| C.8  | Admission status:<br><input type="radio"/> Emergency <input type="radio"/> Scheduled <input type="radio"/> Unknown                                                                                                                                                                                                                                                                                                                                                                                                                                                                                                                                                                                                                                                         |
| C.9  | Main reason for hospitalization:<br><input type="radio"/> MI <input type="radio"/> Unstable angina pectoris <input type="radio"/> Stable angina pectoris <input type="radio"/> Valve dysfunction<br><input type="radio"/> Arrhythmia <input type="radio"/> Heart failure <input type="radio"/> New ischemic stroke <input type="radio"/> New hemorrhagic stroke<br><input type="radio"/> Transient ischemic attack <input type="radio"/> Diabetes <input type="radio"/> Kidney disease<br><input type="radio"/> Cardiac surgery related infections <input type="radio"/> Pericardial effusion or tamponade<br><input type="radio"/> Pulmonary embolism <input type="radio"/> Bleeding except hemorrhagic stroke <input type="radio"/> Others <input type="radio"/> Unknown |
| C.10 | Therapies in hospitalization duration <b>[Check all that apply]:</b><br><input type="checkbox"/> PCI <input type="checkbox"/> CABG <input type="checkbox"/> Thrombolysis <input type="checkbox"/> Coronary angiography<br><input type="checkbox"/> Stroke thrombolysis <input type="checkbox"/> Valve surgery <input type="checkbox"/> LV assist device<br><input type="checkbox"/> Pacemaker or defibrillator implantation <input type="checkbox"/> Pulmonary embolism thrombolysis <input type="checkbox"/> Dialysis<br><input type="checkbox"/> Cardiopulmonary resuscitation <input type="checkbox"/> None above                                                                                                                                                       |

|      |                                                                                                                                                                                                                                                                                                                                                                                                                                                                                                                                                                                                                      |
|------|----------------------------------------------------------------------------------------------------------------------------------------------------------------------------------------------------------------------------------------------------------------------------------------------------------------------------------------------------------------------------------------------------------------------------------------------------------------------------------------------------------------------------------------------------------------------------------------------------------------------|
| H.6  | Supportive documents were collected:<br><input type="checkbox"/> Face sheet<br><input type="checkbox"/> Discharge summary<br><input type="checkbox"/> CAG report<br><input type="checkbox"/> CAG imagine<br><input type="checkbox"/> CABG report<br><input type="checkbox"/> PCI report<br><input type="checkbox"/> CT report<br><input type="checkbox"/> MRI report<br><input type="checkbox"/> None above<br><br><b>Admission note 3</b>                                                                                                                                                                           |
| C.11 | Date of hospitalization: __/__/____ ◦ Unknown                                                                                                                                                                                                                                                                                                                                                                                                                                                                                                                                                                        |
| C.12 | Name of the hospital: _____                                                                                                                                                                                                                                                                                                                                                                                                                                                                                                                                                                                          |
| C.13 | Admission status:<br>◦ Emergency ◦ Scheduled ◦ Unknown                                                                                                                                                                                                                                                                                                                                                                                                                                                                                                                                                               |
| C.14 | Main reason for hospitalization:<br>◦ MI ◦ Unstable angina pectoris ◦ Stable angina pectoris ◦ Valve dysfunction<br>◦ Arrhythmia ◦ Heart failure ◦ New ischemic stroke ◦ New hemorrhagic stroke<br>◦ Transient ischemic attack ◦ Diabetes ◦ Kidney disease<br>◦ Cardiac surgery related infections ◦ Pericardial effusion or tamponade<br>◦ Pulmonary embolism ◦ Bleeding except hemorrhagic stroke ◦ Others ◦ Unknown                                                                                                                                                                                               |
| C.15 | Therapies in hospitalization duration <b>[Check all that apply]:</b><br><input type="checkbox"/> PCI <input type="checkbox"/> CABG <input type="checkbox"/> Thrombolysis <input type="checkbox"/> Coronary angiography<br><input type="checkbox"/> Stroke thrombolysis <input type="checkbox"/> Valve surgery <input type="checkbox"/> LV assist device<br><input type="checkbox"/> Pacemaker or defibrillator implantation <input type="checkbox"/> Pulmonary embolism thrombolysis <input type="checkbox"/> Dialysis<br><input type="checkbox"/> Cardiopulmonary resuscitation <input type="checkbox"/> None above |



H.7 Supportive documents were collected:

- ☐ Face sheet
- ☐ Discharge summary
- ☐ CAG report
- ☐ CAG imagine
- ☐ CABG report
- ☐ PCI report
- ☐ CT report
- ☐ MRI report
- ☐ None above

**Admission note 4**

C.16 Date of hospitalization: \_\_/\_\_/\_\_\_\_ ◦ Unknown

C.17 Name of the hospital: \_\_\_\_\_

C.18 Admission status:

- Emergency
- Scheduled
- Unknown

C.19 Main reason for hospitalization:

- MI
- Unstable angina pectoris
- Stable angina pectoris
- Valve dysfunction
- Arrhythmia
- Heart failure
- New ischemic stroke
- New hemorrhagic stroke
- Transient ischemic attack
- Diabetes
- Kidney disease
- Cardiac surgery related infections
- Pericardial effusion or tamponade
- Pulmonary embolism
- Bleeding except hemorrhagic stroke
- Others
- Unknown

C.20 Therapies in hospitalization duration **[Check all that apply]:**

- ☐ PCI
- ☐ CABG
- ☐ Thrombolysis
- ☐ Coronary angiography
- ☐ Stroke thrombolysis
- ☐ Valve surgery
- ☐ LV assist device
- ☐ Pacemaker or defibrillator implantation
- ☐ Pulmonary embolism thrombolysis
- ☐ Dialysis
- ☐ Cardiopulmonary resuscitation
- ☐ None above

H.8 Supportive documents were collected:

- ☐ Face sheet
- ☐ Discharge summary
- ☐ CAG report
- ☐ CAG imagine
- ☐ CABG report
- ☐ PCI report
- ☐ CT report
- ☐ MRI report
- ☐ None above

**D. ADHERENCE**

D.1 In the past month, how often did you forget to take one or more of your prescribed medications?

- ☐ No prescribed medication **[JUMP TO E1]**    ☐ Never    ☐ Once
- ☐ 2-3 times    ☐ Once per week    ☐ 2-5 times per week
- ☐ Every day or nearly every day    ☐ Unknown    ☐ Refuse to answer

D.2 In the past month, how often did you miss a dose of ASPIRIN?

- ☐ No prescribed this medication **[JUMP TO D4]**    ☐ Never **[JUMP TO D4]**    ☐ Once
- ☐ 2-3 times    ☐ Once per week    ☐ 2-5 times per week
- ☐ Everyday or nearly everyday    ☐ Unknown **[JUMP TO D4]**    ☐ Refuse to answer **[JUMP TO D4]**

D.3 **[If you have ever missed a dose of ASPIRIN] The main reason is...**

- ☐ I Forgot to take it unintentionally
- ☐ Doctors told me to stop taking it
- ☐ I began feeling better, believed it was unnecessary to take it everyday
- ☐ The drug seemed ineffective
- ☐ I was worried about adverse reaction
- ☐ I couldn't afford it
- ☐ I couldn't access it easily
- ☐ Others, please specify:
- ☐ Unknown
- ☐ Refuse to answer

D.4 In the past month, how often did you decide to skip CLOPIDOGREL?

- ☐ No prescribed this medication **[JUMP TO D6]**    ☐ Never **[JUMP TO D6]**    ☐ Once
- ☐ 2-3 times    ☐ Once per week    ☐ 2-5 times per week
- ☐ Everyday or nearly everyday    ☐ Unknown **[JUMP TO D6]**    ☐ Refuse to answer **[JUMP TO D6]**





|      |                                                                                                                                                                                                                                                                                                                                                                                                                                                                           |                       |                       |                       |                       |                       |                       |                       |
|------|---------------------------------------------------------------------------------------------------------------------------------------------------------------------------------------------------------------------------------------------------------------------------------------------------------------------------------------------------------------------------------------------------------------------------------------------------------------------------|-----------------------|-----------------------|-----------------------|-----------------------|-----------------------|-----------------------|-----------------------|
| E.1  | Dressing yourself                                                                                                                                                                                                                                                                                                                                                                                                                                                         | <input type="radio"/> |
| E.2  | Walking indoors on level ground                                                                                                                                                                                                                                                                                                                                                                                                                                           | <input type="radio"/> |
| E.3  | Showering                                                                                                                                                                                                                                                                                                                                                                                                                                                                 | <input type="radio"/> |
| E.4  | Climbing a hill or a flight of stairs without stopping                                                                                                                                                                                                                                                                                                                                                                                                                    | <input type="radio"/> |
| E.5  | Gardening, vacuuming or carrying groceries                                                                                                                                                                                                                                                                                                                                                                                                                                | <input type="radio"/> |
| E.6  | Walking more than a block at a brisk pace                                                                                                                                                                                                                                                                                                                                                                                                                                 | <input type="radio"/> |
| E.7  | Running or jogging                                                                                                                                                                                                                                                                                                                                                                                                                                                        | <input type="radio"/> |
| E.8  | Lifting or moving heavy objects (e.g. furniture, children)                                                                                                                                                                                                                                                                                                                                                                                                                | <input type="radio"/> |
| E.9  | Participating in strenuous sports (e.g. swimming, tennis)                                                                                                                                                                                                                                                                                                                                                                                                                 | <input type="radio"/> |
| E.10 | <p>Compared with 4 weeks ago, how often do you have chest pain ,chest tightness or angina when doing your most strenuous activities?</p> <p><input type="radio"/> Much more often   <input type="radio"/> Slightly more often   <input type="radio"/> About the same   <input type="radio"/> Slightly less often   <input type="radio"/> Much less often   <input type="radio"/> None over the past 4 weeks   <input type="radio"/> Refuse to answer or unknown</p>       |                       |                       |                       |                       |                       |                       |                       |
| E.11 | <p>Over the past 4 weeks, on average, how many times have you had chest pain, chest tightness or angina?</p> <p><input type="radio"/> ≥4 or more times per day<br/> <input type="radio"/> 1-3 times per day<br/> <input type="radio"/> 3-6 times per week<br/> <input type="radio"/> 1-2 times per week<br/> <input type="radio"/> Less than once a week<br/> <input type="radio"/> None over the past 4 weeks<br/> <input type="radio"/> Refuse to answer or unknown</p> |                       |                       |                       |                       |                       |                       |                       |

- E.12 Over the past 4 weeks, on average, how many times have you had to take nitroglycerin?
- $\geq 4$  or more times per day
  - 1-3 times per day
  - 3-6 times per week
  - 1-2 times per week
  - Less than once a week
  - None over the past 4 weeks
  - Refuse to answer or unknown
- E.13 How bothersome is it for you to take pills for chest pain, chest tightness or angina as prescribed?
- Extremely bothersome
  - Quite a bit bothersome
  - Moderately bothersome
  - Slightly bothersome
  - Not bothersome at all
  - My doctor has not prescribed pills
  - Refuse to answer or unknown
- E.14 How satisfied are you that everything possible is being done to treat your chest pain, chest tightness or angina?
- Not satisfied at all
  - Mostly dissatisfied
  - Somewhat satisfied
  - Mostly satisfied
  - Completely satisfied
  - Refuse to answer or unknown
- E.15 How satisfied are you with explanations your doctor has given about your chest pain, chest tightness or angina?
- Not satisfied at all
  - Mostly dissatisfied
  - Somewhat satisfied
  - Mostly satisfied
  - Completely satisfied
  - Refuse to answer or unknown
- E.16 Overall, how satisfied are you with the current treatment of your chest pain, chest tightness or angina?
- Not satisfied at all
  - Mostly dissatisfied
  - Somewhat satisfied
  - Mostly satisfied
  - Completely satisfied
  - Refuse to answer or unknown

|                                                                                                                                                                               |                                                                                                                                                                                                                                                                                                                                                                                                                                                        |
|-------------------------------------------------------------------------------------------------------------------------------------------------------------------------------|--------------------------------------------------------------------------------------------------------------------------------------------------------------------------------------------------------------------------------------------------------------------------------------------------------------------------------------------------------------------------------------------------------------------------------------------------------|
| E.17                                                                                                                                                                          | Over the past 4 weeks, how much has your chest pain, chest tightness or angina limited your enjoyment of life?<br><input type="radio"/> Extremely limited <input type="radio"/> Quite a bit limited <input type="radio"/> Moderately limited <input type="radio"/> Slightly limited <input type="radio"/> Not limited at all <input type="radio"/> Refuse to answer or unknown                                                                         |
| E.18                                                                                                                                                                          | If you had to spend the rest of your life with your chest pain, chest tightness or angina the way it is right now, how would you feel about this?<br><input type="radio"/> Not satisfied at all<br><input type="radio"/> Mostly dissatisfied<br><input type="radio"/> Somewhat satisfied<br><input type="radio"/> Mostly satisfied<br><input type="radio"/> Completely satisfied<br><input type="radio"/> Refuse to answer or unknown                  |
| E.19                                                                                                                                                                          | How often do you think or worry that you may have a heart attack or die suddenly?<br><input type="radio"/> I can't stop thinking or worrying about it<br><input type="radio"/> I often think or worry about it<br><input type="radio"/> I occasionally think or worry about it<br><input type="radio"/> I rarely think or worry about it<br><input type="radio"/> I never think or worry about it<br><input type="radio"/> Refuse to answer or unknown |
| <b>F. HEALTH-RELATED QUALITY OF LIFE (EQ-5D)</b>                                                                                                                              |                                                                                                                                                                                                                                                                                                                                                                                                                                                        |
| The following questions ask about your current health state. In each of the following categories, please indicate which statement best describes your own health state today. |                                                                                                                                                                                                                                                                                                                                                                                                                                                        |
| F.1                                                                                                                                                                           | Mobility<br><input type="radio"/> I have <b>no</b> problems in walking about.<br><input type="radio"/> I have <b>some</b> problems in walking about.<br><input type="radio"/> I am <b>confined to bed</b> .<br><input type="radio"/> Refuse to answer or unknown                                                                                                                                                                                       |
| F.2                                                                                                                                                                           | Self-care<br><input type="radio"/> I have <b>no</b> problems with self-care.<br><input type="radio"/> I have <b>some</b> problems washing or dressing myself.<br><input type="radio"/> I am <b>unable to wash or dress myself</b> .<br><input type="radio"/> Refuse to answer or unknown                                                                                                                                                               |

F.3 Usual activities (e.g., work, study, housework, family or leisure activities)

- I have **no** problems with performing my usual activities.
- I have **some** problems with performing my usual activities.
- I am **unable to perform my usual activities**.
- Refuse to answer or unknown

F.4 Pain/discomfort

- I have **no** pain or discomfort.
- I have **moderate** pain or discomfort.
- I have **extreme** pain or discomfort.
- Refuse to answer or unknown

F.5 Anxiety/depression

- I am **not** anxious or depressed.
- I am **moderately** anxious or depressed.
- I am **extremely** anxious or depressed.
- Refuse to answer or unknown

F.6 Please **score** how good or bad your own health is today. The best state you can imagine is 100 and the worst health state you can imagine is 0. Overall, how would you score your own health today between 0 and 100?  
Enter value between 0 and 100: \_ \_ \_ ○ Refuse to answer

**G. DEPRESSION**

| Over the last 2 weeks, how often have you been bothered by any of the following problems? |                                                                                                |            |              |                         |                  |                             |
|-------------------------------------------------------------------------------------------|------------------------------------------------------------------------------------------------|------------|--------------|-------------------------|------------------|-----------------------------|
|                                                                                           |                                                                                                | Not at all | Several days | More than half the days | Nearly every day | Refuse to answer or unknown |
| G.1                                                                                       | Little interest or pleasure in doing things                                                    | ○          | ○            | ○                       | ○                | ○                           |
| G.2                                                                                       | Feeling down, depressed or hopeless                                                            | ○          | ○            | ○                       | ○                | ○                           |
| G.3                                                                                       | Trouble falling or staying asleep, or sleeping too much                                        | ○          | ○            | ○                       | ○                | ○                           |
| G.4                                                                                       | Feeling tired or having little energy                                                          | ○          | ○            | ○                       | ○                | ○                           |
| G.5                                                                                       | Poor appetite or overeating                                                                    | ○          | ○            | ○                       | ○                | ○                           |
| G.6                                                                                       | Feeling bad about yourself, or that you are a failure or have let yourself or your family down | ○          | ○            | ○                       | ○                | ○                           |



|     |                                                                                                                                                                          |                       |                       |                       |                       |                       |
|-----|--------------------------------------------------------------------------------------------------------------------------------------------------------------------------|-----------------------|-----------------------|-----------------------|-----------------------|-----------------------|
| G.7 | Trouble concentrating on things, such as reading the newspaper or watching television                                                                                    | <input type="radio"/> |
| G.8 | Moving or speaking so slowly that other people could have noticed. Or the opposite – being so fidgety or restless that you have been moving around a lot more than usual | <input type="radio"/> |

## H. STRESS

The questions in this scale ask about your thoughts and feelings during the last month. In each case, you will be asked to indicate how often you felt or thought a certain way. Although some of the questions are similar, there are differences between them and you should treat each one as a separate question. The best approach is to answer each question fairly quickly. That is, don't try to count up the number of times you felt a particular way, but rather indicate the alternative that seems most reasonable. For each question choose the following alternatives: never, almost never, sometimes, fairly often, and very often.

|     |                                                                                                                  | Never                 | Almost never          | Sometimes             | Fairly often          | Very often            | Refuse to answer or unknown |
|-----|------------------------------------------------------------------------------------------------------------------|-----------------------|-----------------------|-----------------------|-----------------------|-----------------------|-----------------------------|
| H.1 | In the last month, how often have you felt that you were unable to control the important things in your life?    | <input type="radio"/>       |
| H.2 | In the last month, how often have you felt confident in your ability to handle your personal problems?           | <input type="radio"/>       |
| H.3 | In the last month, how often have you felt that things were going your way?                                      | <input type="radio"/>       |
| H.4 | In the last month, how often have you felt difficulties were piling up so high that you could not overcome them? | <input type="radio"/>       |

## 12 Month Follow-up Interview

### A. BASIC INFORMATION

Type of follow-up:

- ☐ Face-to-face interview
- ☐ Telephone interview [go to A4]

Was bio-sample collected?

- ☐ No
- ☐ Yes

ID of bio-sample: \_\_\_\_\_ [go to B1]

Did the participant answered the telephone interview by him/herself?

- ☐ Yes
- ☐ No, who: \_\_\_\_ [go to C1]

### B. FOLLOW-UP MEASUREMENTS

Weight: \_\_\_\_ kg ☐ Unmeasured

Waistline: \_\_\_\_ cm ☐ Unmeasured

Blood pressure 1<sup>st</sup>: \_\_\_\_/\_\_\_\_mmHg

Blood pressure 2<sup>nd</sup>: \_\_\_\_/\_\_\_\_mmHg

[if difference between 1<sup>st</sup> and 2<sup>nd</sup> >5mmHg] Blood pressure 3<sup>rd</sup>: \_\_\_\_/\_\_\_\_mmHg ()

ID of bio-sample: \_\_\_\_\_

### C. OUTCOMES

#### Admission note 1

C.1 Date of hospitalization: \_\_/\_\_/\_\_\_\_ ☐ Unknown

C.2 Name of the hospital: \_\_\_\_\_

C.3 Admission status:

- ☐ Emergency
- ☐ Scheduled
- ☐ Unknown

C.4 Main reason for hospitalization:

- ☐ MI
- ☐ Unstable angina pectoris
- ☐ Stable angina pectoris
- ☐ Valve dysfunction
- ☐ Arrhythmia
- ☐ Heart failure
- ☐ New ischemic stroke
- ☐ New hemorrhagic stroke
- ☐ Transient ischemic attack
- ☐ Diabetes
- ☐ Kidney disease

|                         |                                                                                                                                                                                                                                                                                                                                                                                                                                                                                                                                                                                                                                                                                                                                                                            |
|-------------------------|----------------------------------------------------------------------------------------------------------------------------------------------------------------------------------------------------------------------------------------------------------------------------------------------------------------------------------------------------------------------------------------------------------------------------------------------------------------------------------------------------------------------------------------------------------------------------------------------------------------------------------------------------------------------------------------------------------------------------------------------------------------------------|
|                         | <input type="radio"/> Cardiac surgery related infections <input type="radio"/> Pericardial effusion or tamponade<br><input type="radio"/> Pulmonary embolism <input type="radio"/> Bleeding except hemorrhagic stroke <input type="radio"/> Others <input type="radio"/> Unknown                                                                                                                                                                                                                                                                                                                                                                                                                                                                                           |
| C.5                     | Therapies in hospitalization duration <b>[Check all that apply]:</b><br><input type="checkbox"/> PCI <input type="checkbox"/> CABG <input type="checkbox"/> Thrombolysis <input type="checkbox"/> Coronary angiography<br><input type="checkbox"/> Stroke thrombolysis <input type="checkbox"/> Valve surgery <input type="checkbox"/> LV assist device<br><input type="checkbox"/> Pacemaker or defibrillator implantation <input type="checkbox"/> Pulmonary embolism thrombolysis <input type="checkbox"/> Dialysis<br><input type="checkbox"/> Cardiopulmonary resuscitation <input type="checkbox"/> None above                                                                                                                                                       |
| H.5                     | Supportive documents were collected:<br><input type="checkbox"/> Face sheet<br><input type="checkbox"/> Discharge summary<br><input type="checkbox"/> CAG report<br><input type="checkbox"/> CAG imagine<br><input type="checkbox"/> CABG report<br><input type="checkbox"/> PCI report<br><input type="checkbox"/> CT report<br><input type="checkbox"/> MRI report<br><input type="checkbox"/> None above                                                                                                                                                                                                                                                                                                                                                                |
| <b>Admission note 2</b> |                                                                                                                                                                                                                                                                                                                                                                                                                                                                                                                                                                                                                                                                                                                                                                            |
| C.6                     | Date of hospitalization: __/__/____ <input type="radio"/> Unknown                                                                                                                                                                                                                                                                                                                                                                                                                                                                                                                                                                                                                                                                                                          |
| C.7                     | Name of the hospital: _____                                                                                                                                                                                                                                                                                                                                                                                                                                                                                                                                                                                                                                                                                                                                                |
| C.8                     | Admission status:<br><input type="radio"/> Emergency <input type="radio"/> Scheduled <input type="radio"/> Unknown                                                                                                                                                                                                                                                                                                                                                                                                                                                                                                                                                                                                                                                         |
| C.9                     | Main reason for hospitalization:<br><input type="radio"/> MI <input type="radio"/> Unstable angina pectoris <input type="radio"/> Stable angina pectoris <input type="radio"/> Valve dysfunction<br><input type="radio"/> Arrhythmia <input type="radio"/> Heart failure <input type="radio"/> New ischemic stroke <input type="radio"/> New hemorrhagic stroke<br><input type="radio"/> Transient ischemic attack <input type="radio"/> Diabetes <input type="radio"/> Kidney disease<br><input type="radio"/> Cardiac surgery related infections <input type="radio"/> Pericardial effusion or tamponade<br><input type="radio"/> Pulmonary embolism <input type="radio"/> Bleeding except hemorrhagic stroke <input type="radio"/> Others <input type="radio"/> Unknown |
| C.10                    | Therapies in hospitalization duration <b>[Check all that apply]:</b><br><input type="checkbox"/> PCI <input type="checkbox"/> CABG <input type="checkbox"/> Thrombolysis <input type="checkbox"/> Coronary angiography<br><input type="checkbox"/> Stroke thrombolysis <input type="checkbox"/> Valve surgery <input type="checkbox"/> LV assist device<br><input type="checkbox"/> Pacemaker or defibrillator implantation <input type="checkbox"/> Pulmonary embolism thrombolysis <input type="checkbox"/> Dialysis<br><input type="checkbox"/> Cardiopulmonary resuscitation <input type="checkbox"/> None above                                                                                                                                                       |

|      |                                                                                                                                                                                                                                                                                                                                                                                                                                                                                                                                                                                                                                                                                                                                                                            |
|------|----------------------------------------------------------------------------------------------------------------------------------------------------------------------------------------------------------------------------------------------------------------------------------------------------------------------------------------------------------------------------------------------------------------------------------------------------------------------------------------------------------------------------------------------------------------------------------------------------------------------------------------------------------------------------------------------------------------------------------------------------------------------------|
| H.6  | Supportive documents were collected:<br><input type="checkbox"/> Face sheet<br><input type="checkbox"/> Discharge summary<br><input type="checkbox"/> CAG report<br><input type="checkbox"/> CAG imagine<br><input type="checkbox"/> CABG report<br><input type="checkbox"/> PCI report<br><input type="checkbox"/> CT report<br><input type="checkbox"/> MRI report<br><input type="checkbox"/> None above<br><br><b>Admission note 3</b>                                                                                                                                                                                                                                                                                                                                 |
| C.11 | Date of hospitalization: __/__/____ <input type="radio"/> Unknown                                                                                                                                                                                                                                                                                                                                                                                                                                                                                                                                                                                                                                                                                                          |
| C.12 | Name of the hospital: _____                                                                                                                                                                                                                                                                                                                                                                                                                                                                                                                                                                                                                                                                                                                                                |
| C.13 | Admission status:<br><input type="radio"/> Emergency <input type="radio"/> Scheduled <input type="radio"/> Unknown                                                                                                                                                                                                                                                                                                                                                                                                                                                                                                                                                                                                                                                         |
| C.14 | Main reason for hospitalization:<br><input type="radio"/> MI <input type="radio"/> Unstable angina pectoris <input type="radio"/> Stable angina pectoris <input type="radio"/> Valve dysfunction<br><input type="radio"/> Arrhythmia <input type="radio"/> Heart failure <input type="radio"/> New ischemic stroke <input type="radio"/> New hemorrhagic stroke<br><input type="radio"/> Transient ischemic attack <input type="radio"/> Diabetes <input type="radio"/> Kidney disease<br><input type="radio"/> Cardiac surgery related infections <input type="radio"/> Pericardial effusion or tamponade<br><input type="radio"/> Pulmonary embolism <input type="radio"/> Bleeding except hemorrhagic stroke <input type="radio"/> Others <input type="radio"/> Unknown |
| C.15 | Therapies in hospitalization duration <b>[Check all that apply]:</b><br><input type="checkbox"/> PCI <input type="checkbox"/> CABG <input type="checkbox"/> Thrombolysis <input type="checkbox"/> Coronary angiography<br><input type="checkbox"/> Stroke thrombolysis <input type="checkbox"/> Valve surgery <input type="checkbox"/> LV assist device<br><input type="checkbox"/> Pacemaker or defibrillator implantation <input type="checkbox"/> Pulmonary embolism thrombolysis <input type="checkbox"/> Dialysis<br><input type="checkbox"/> Cardiopulmonary resuscitation <input type="checkbox"/> None above                                                                                                                                                       |

|      |                                                                                                                                                                                                                                                                                                                                                                                                                                                                                                                                                                                                                                                                                                                                                                            |
|------|----------------------------------------------------------------------------------------------------------------------------------------------------------------------------------------------------------------------------------------------------------------------------------------------------------------------------------------------------------------------------------------------------------------------------------------------------------------------------------------------------------------------------------------------------------------------------------------------------------------------------------------------------------------------------------------------------------------------------------------------------------------------------|
| H.7  | Supportive documents were collected:<br><input type="checkbox"/> Face sheet<br><input type="checkbox"/> Discharge summary<br><input type="checkbox"/> CAG report<br><input type="checkbox"/> CAG imagine<br><input type="checkbox"/> CABG report<br><input type="checkbox"/> PCI report<br><input type="checkbox"/> CT report<br><input type="checkbox"/> MRI report<br><input type="checkbox"/> None above<br><br><b>Admission note 4</b>                                                                                                                                                                                                                                                                                                                                 |
| C.16 | Date of hospitalization: __/__/____ <input type="radio"/> Unknown                                                                                                                                                                                                                                                                                                                                                                                                                                                                                                                                                                                                                                                                                                          |
| C.17 | Name of the hospital: _____                                                                                                                                                                                                                                                                                                                                                                                                                                                                                                                                                                                                                                                                                                                                                |
| C.18 | Admission status:<br><input type="radio"/> Emergency <input type="radio"/> Scheduled <input type="radio"/> Unknown                                                                                                                                                                                                                                                                                                                                                                                                                                                                                                                                                                                                                                                         |
| C.19 | Main reason for hospitalization:<br><input type="radio"/> MI <input type="radio"/> Unstable angina pectoris <input type="radio"/> Stable angina pectoris <input type="radio"/> Valve dysfunction<br><input type="radio"/> Arrhythmia <input type="radio"/> Heart failure <input type="radio"/> New ischemic stroke <input type="radio"/> New hemorrhagic stroke<br><input type="radio"/> Transient ischemic attack <input type="radio"/> Diabetes <input type="radio"/> Kidney disease<br><input type="radio"/> Cardiac surgery related infections <input type="radio"/> Pericardial effusion or tamponade<br><input type="radio"/> Pulmonary embolism <input type="radio"/> Bleeding except hemorrhagic stroke <input type="radio"/> Others <input type="radio"/> Unknown |
| C.20 | Therapies in hospitalization duration <b>[Check all that apply]:</b><br><input type="checkbox"/> PCI <input type="checkbox"/> CABG <input type="checkbox"/> Thrombolysis <input type="checkbox"/> Coronary angiography<br><input type="checkbox"/> Stroke thrombolysis <input type="checkbox"/> Valve surgery <input type="checkbox"/> LV assist device<br><input type="checkbox"/> Pacemaker or defibrillator implantation <input type="checkbox"/> Pulmonary embolism thrombolysis <input type="checkbox"/> Dialysis<br><input type="checkbox"/> Cardiopulmonary resuscitation <input type="checkbox"/> None above                                                                                                                                                       |

H.8 Supportive documents were collected:

- ☐ Face sheet
- ☐ Discharge summary
- ☐ CAG report
- ☐ CAG imagine
- ☐ CABG report
- ☐ PCI report
- ☐ CT report
- ☐ MRI report
- ☐ None above

**D. ADHERENCE**

D.1 In the past month, how often did you forget to take one or more of your prescribed medications?

- ☐ No prescribed medication **[JUMP TO E1]**    ☐ Never    ☐ Once
- ☐ 2-3 times    ☐ Once per week    ☐ 2-5 times per week
- ☐ Every day or nearly every day    ☐ Unknown    ☐ Refuse to answer

D.2 In the past month, how often did you miss a dose of ASPIRIN?

- ☐ No prescribed this medication **[JUMP TO D4]**    ☐ Never **[JUMP TO D4]**    ☐ Once
- ☐ 2-3 times    ☐ Once per week    ☐ 2-5 times per week
- ☐ Everyday or nearly everyday    ☐ Unknown **[JUMP TO D4]**    ☐ Refuse to answer **[JUMP TO D4]**

D.3 **[If you have ever missed a dose of ASPIRIN] The main reason is...**

- ☐ I Forgot to take it unintentionally
- ☐ Doctors told me to stop taking it
- ☐ I began feeling better, believed it was unnecessary to take it everyday
- ☐ The drug seemed ineffective
- ☐ I was worried about adverse reaction
- ☐ I couldn't afford it
- ☐ I couldn't access it easily
- ☐ Others, please specify:
- ☐ Unknown
- ☐ Refuse to answer

D.4 In the past month, how often did you decide to skip CLOPIDOGREL?

- ☐ No prescribed this medication **[JUMP TO D6]**    ☐ Never **[JUMP TO D6]**    ☐ Once
- ☐ 2-3 times    ☐ Once per week    ☐ 2-5 times per week
- ☐ Everyday or nearly everyday    ☐ Unknown **[JUMP TO D6]**    ☐ Refuse to answer **[JUMP TO D6]**

D.5 **[If you have ever missed a dose of CLOPIDOGREL] The main reason is...**

☐ I Forgot to take it unintentionally  
☐ Doctors told me to stop taking it  
☐ I began feeling better, believed it was unnecessary to take it everyday  
☐ The drug seemed ineffective  
☐ I was worried about adverse reaction  
☐ I couldn't afford it  
☐ I couldn't access it easily  
☐ Others, please specify:  
☐ Unknown  
☐ Refuse to answer

D.6 In the past month, how often did you decide to skip STATINs?

☐ No prescribed this medication [**JUMP TO D9**]   ☐ Never [**JUMP TO D9**]   ☐ Once  
☐ 2-3 times   ☐ Once per week   ☐ 2-5 times per week  
☐ Everyday or nearly everyday   ☐ Unknown [**JUMP TO D9**]   ☐ Refuse to answer [**JUMP TO D9**]

D.7 **[If you have ever missed a dose of STATINs]** The main reason is...

☐ I Forgot to take it unintentionally  
☐ Doctors told me to stop taking it  
☐ I began feeling better, believed it was unnecessary to take it everyday  
☐ The drug seemed ineffective  
☐ I was worried about adverse reaction  
☐ I couldn't afford it  
☐ I couldn't access it easily  
☐ Others, please specify:  
☐ Unknown  
☐ Refuse to answer

D.8 In the past month, how often did you decide to skip BETA-BLOCKERs?

☐ No prescribed this medication [**JUMP TO E1**]   ☐ Never [**JUMP TO E1**]   ☐ Once  
☐ 2-3 times   ☐ Once per week   ☐ 2-5 times per week  
☐ Everyday or nearly everyday   ☐ Unknown [**JUMP TO E1**]   ☐ Refuse to answer [**JUMP TO E1**]

D.9 The drug name and dosage: \_\_\_\_\_

D.10 **[If you have ever missed a dose of BETA-BLOCKERs]** The main reason is...

☐ I Forgot to take it unintentionally  
☐ Doctors told me to stop taking it  
☐ I began feeling better, believed it was unnecessary to take it everyday  
☐ The drug seemed ineffective  
☐ I was worried about adverse reaction  
☐ I couldn't afford it

|                               |                                                                                                                                                                                                                                                                                                                                                                                                                                                                                                                                                                  |
|-------------------------------|------------------------------------------------------------------------------------------------------------------------------------------------------------------------------------------------------------------------------------------------------------------------------------------------------------------------------------------------------------------------------------------------------------------------------------------------------------------------------------------------------------------------------------------------------------------|
|                               | <ul style="list-style-type: none"> <li>○ I couldn't access it easily</li> <li>○ Others, please specify:</li> <li>○ Unknown</li> <li>○ Refuse to answer</li> </ul>                                                                                                                                                                                                                                                                                                                                                                                                |
| H.9                           | <p>In the past month, how often did you decide to skip <u>ACEI/ARBs</u>?</p> <ul style="list-style-type: none"> <li>○ No prescribed this medication [<b>JUMP TO D12</b>]</li> <li>○ Never [<b>JUMP TO D12</b>]</li> <li>○ Once</li> <li>○ 2-3 times</li> <li>○ Once per week</li> <li>○ 2-5 times per week</li> <li>○ Everyday or nearly everyday</li> <li>○ Unknown [<b>JUMP TO D12</b>]</li> <li>○ Refuse to answer [<b>JUMP TO D12</b>]</li> </ul>                                                                                                            |
| H.10                          | The drug name and dosage: _____                                                                                                                                                                                                                                                                                                                                                                                                                                                                                                                                  |
| H.11                          | <p><b>[If you have ever missed a dose of <u>ACEI/ARBs</u>]</b> The main reason is...</p> <ul style="list-style-type: none"> <li>○ I Forgot to take it unintentionally</li> <li>○ Doctors told me to stop taking it</li> <li>○ I began feeling better, believed it was unnecessary to take it everyday</li> <li>○ The drug seemed ineffective</li> <li>○ I was worried about adverse reaction</li> <li>○ I couldn't afford it</li> <li>○ I couldn't access it easily</li> <li>○ Others, please specify:</li> <li>○ Unknown</li> <li>○ Refuse to answer</li> </ul> |
| <b>E. HEALTH CARE SERVICE</b> |                                                                                                                                                                                                                                                                                                                                                                                                                                                                                                                                                                  |
| E.1                           | <p>After the index hospitalization, have you ever been to TCM clinics or seen TCM doctors for heart problem?</p> <ul style="list-style-type: none"> <li>○ No</li> <li>○ Yes</li> <li>○ Unknown</li> <li>○ Refuse to answer</li> </ul>                                                                                                                                                                                                                                                                                                                            |
| E.2                           | <p>After the index hospitalization, when you got chest tightness or pain after the index hospitalization, which kind of clinics or doctors did you go to?</p> <ul style="list-style-type: none"> <li>○ No chest tightness or pain before</li> <li>○ TCM alone</li> <li>○ Mostly TCM</li> <li>○ TCM and western medicine equally</li> <li>○ Mostly western medicine</li> <li>○ Western medicine alone</li> <li>○ Unknown</li> <li>○ Refuse to answer</li> </ul>                                                                                                   |
| E.3                           | <p>After the index hospitalization, have you ever taken TCM medications?</p> <ul style="list-style-type: none"> <li>○ No [<b>JUMP TO E5</b>]</li> <li>○ Yes</li> <li>○ Unknown [<b>JUMP TO E5</b>]</li> <li>○ Refuse to answer</li> </ul>                                                                                                                                                                                                                                                                                                                        |
| E.4                           | <p><b>[IF E3 "YES"]</b> After the index hospitalization, have you ever taken TCM medications for heart problems?</p> <ul style="list-style-type: none"> <li>○ No</li> <li>○ Yes, please specify: ____</li> <li>○ Unknown</li> <li>○ Refuse to answer</li> </ul>                                                                                                                                                                                                                                                                                                  |
| E.5                           | After the index hospitalization, have you ever accepted TCM physiotherapy (acupuncture, massage, cupping, etc.)?                                                                                                                                                                                                                                                                                                                                                                                                                                                 |



|                                                                                                                                                                     | <input type="radio"/> No <b>[JUMP TO E8]</b> <input type="radio"/> Yes <input type="radio"/> Unknown <b>[JUMP TO E8]</b> <input type="radio"/> Refuse to answer <b>[JUMP TO E8]</b>                                                                                                                                                                                                                                                                                                                                                                                                                                                                                                                                                                                                                           |                       |                       |                       |                       |                                                  |                             |                                                  |                             |                   |                       |                       |                       |                       |                       |                       |                       |
|---------------------------------------------------------------------------------------------------------------------------------------------------------------------|---------------------------------------------------------------------------------------------------------------------------------------------------------------------------------------------------------------------------------------------------------------------------------------------------------------------------------------------------------------------------------------------------------------------------------------------------------------------------------------------------------------------------------------------------------------------------------------------------------------------------------------------------------------------------------------------------------------------------------------------------------------------------------------------------------------|-----------------------|-----------------------|-----------------------|-----------------------|--------------------------------------------------|-----------------------------|--------------------------------------------------|-----------------------------|-------------------|-----------------------|-----------------------|-----------------------|-----------------------|-----------------------|-----------------------|-----------------------|
| E.6                                                                                                                                                                 | <b>[IF E5 “YES”]</b> After the index hospitalization, have you ever accepted TCM physiotherapy (acupuncture, massage, cupping, etc.) for heart problems?<br><input type="radio"/> No <input type="radio"/> Yes <input type="radio"/> Unknown <input type="radio"/> Refuse to answer                                                                                                                                                                                                                                                                                                                                                                                                                                                                                                                           |                       |                       |                       |                       |                                                  |                             |                                                  |                             |                   |                       |                       |                       |                       |                       |                       |                       |
| E.7                                                                                                                                                                 | <b>[IF E3 or E5 “YES”]</b> After the index hospitalization, have you ever decided to stop or skip medications because you are using TCM medications and interventions instead?<br><input type="radio"/> No <input type="radio"/> Yes <input type="radio"/> Unknown <input type="radio"/> Refuse to answer                                                                                                                                                                                                                                                                                                                                                                                                                                                                                                     |                       |                       |                       |                       |                                                  |                             |                                                  |                             |                   |                       |                       |                       |                       |                       |                       |                       |
| E.8                                                                                                                                                                 | What types of medical insurance do you have? <b>[Check all that apply]</b><br><input type="checkbox"/> Public health service<br><input type="checkbox"/> Medical insurance for urban workers/residents<br><input type="checkbox"/> Comprehensive arrangement for serious disease<br><input type="checkbox"/> Rural cooperative medical service<br><input type="checkbox"/> Other social medical insurance<br><input type="checkbox"/> Commercial medical insurance<br><input type="checkbox"/> None<br><input type="checkbox"/> Unknown                                                                                                                                                                                                                                                                       |                       |                       |                       |                       |                                                  |                             |                                                  |                             |                   |                       |                       |                       |                       |                       |                       |                       |
| E.9                                                                                                                                                                 | The total medical expense during the past year is approximately _____. <input type="radio"/> Unknown <input type="radio"/> Refuse to answer                                                                                                                                                                                                                                                                                                                                                                                                                                                                                                                                                                                                                                                                   |                       |                       |                       |                       |                                                  |                             |                                                  |                             |                   |                       |                       |                       |                       |                       |                       |                       |
| E.10                                                                                                                                                                | The medical expense paid out-of-pocket during the past year is approximately _____. <input type="radio"/> Unknown <input type="radio"/> Refuse to answer                                                                                                                                                                                                                                                                                                                                                                                                                                                                                                                                                                                                                                                      |                       |                       |                       |                       |                                                  |                             |                                                  |                             |                   |                       |                       |                       |                       |                       |                       |                       |
| E.11                                                                                                                                                                | In the past 12 month, have you ever borrowed money from others to pay for medical expense?<br><input type="radio"/> Yes <input type="radio"/> No <input type="radio"/> Unknown <input type="radio"/> Refuse to answer                                                                                                                                                                                                                                                                                                                                                                                                                                                                                                                                                                                         |                       |                       |                       |                       |                                                  |                             |                                                  |                             |                   |                       |                       |                       |                       |                       |                       |                       |
| E.12                                                                                                                                                                | In the past 12 month, have you ever avoided healthcare due to costs?<br><input type="radio"/> Yes <input type="radio"/> No <input type="radio"/> Unknown <input type="radio"/> Refuse to answer                                                                                                                                                                                                                                                                                                                                                                                                                                                                                                                                                                                                               |                       |                       |                       |                       |                                                  |                             |                                                  |                             |                   |                       |                       |                       |                       |                       |                       |                       |
| E.13                                                                                                                                                                | What do you think of the burden of medical expense mentioned above?<br><input type="radio"/> Can not undertake <input type="radio"/> Almost undertake <input type="radio"/> Can undertake easily <input type="radio"/> Unknown <input type="radio"/> Refuse to answer                                                                                                                                                                                                                                                                                                                                                                                                                                                                                                                                         |                       |                       |                       |                       |                                                  |                             |                                                  |                             |                   |                       |                       |                       |                       |                       |                       |                       |
| <b>F. CVD FUNCTIONAL STATUS (SAQ)</b>                                                                                                                               |                                                                                                                                                                                                                                                                                                                                                                                                                                                                                                                                                                                                                                                                                                                                                                                                               |                       |                       |                       |                       |                                                  |                             |                                                  |                             |                   |                       |                       |                       |                       |                       |                       |                       |
| <b>Please go over the activities listed below and indicate how much limitation you have had due to chest pain ,chest tightness or angina over the past 4 weeks?</b> |                                                                                                                                                                                                                                                                                                                                                                                                                                                                                                                                                                                                                                                                                                                                                                                                               |                       |                       |                       |                       |                                                  |                             |                                                  |                             |                   |                       |                       |                       |                       |                       |                       |                       |
| F.1                                                                                                                                                                 | <table border="1" style="width: 100%; border-collapse: collapse; text-align: center;"> <tr> <th style="width: 30%;">Physical Activity</th> <th style="width: 10%;">Extremely limited</th> <th style="width: 10%;">Quite a bit limited</th> <th style="width: 10%;">Moderately limited</th> <th style="width: 10%;">Slightly limited</th> <th style="width: 10%;">Not at all limited</th> <th style="width: 10%;">Limited for other reasons or did not do activity</th> <th style="width: 10%;">Refuse to answer or unknown</th> </tr> <tr> <td>Dressing yourself</td> <td><input type="radio"/></td> </tr> </table> | Physical Activity     | Extremely limited     | Quite a bit limited   | Moderately limited    | Slightly limited                                 | Not at all limited          | Limited for other reasons or did not do activity | Refuse to answer or unknown | Dressing yourself | <input type="radio"/> |
| Physical Activity                                                                                                                                                   | Extremely limited                                                                                                                                                                                                                                                                                                                                                                                                                                                                                                                                                                                                                                                                                                                                                                                             | Quite a bit limited   | Moderately limited    | Slightly limited      | Not at all limited    | Limited for other reasons or did not do activity | Refuse to answer or unknown |                                                  |                             |                   |                       |                       |                       |                       |                       |                       |                       |
| Dressing yourself                                                                                                                                                   | <input type="radio"/>                                                                                                                                                                                                                                                                                                                                                                                                                                                                                                                                                                                                                                                                                                                                                                                         | <input type="radio"/> | <input type="radio"/> | <input type="radio"/> | <input type="radio"/> | <input type="radio"/>                            | <input type="radio"/>       |                                                  |                             |                   |                       |                       |                       |                       |                       |                       |                       |

|      |                                                                                                                                                                                                                                                                                                                                                                                                                                                                           |                       |                       |                       |                       |                       |                       |                       |
|------|---------------------------------------------------------------------------------------------------------------------------------------------------------------------------------------------------------------------------------------------------------------------------------------------------------------------------------------------------------------------------------------------------------------------------------------------------------------------------|-----------------------|-----------------------|-----------------------|-----------------------|-----------------------|-----------------------|-----------------------|
| F.2  | Walking indoors on level ground                                                                                                                                                                                                                                                                                                                                                                                                                                           | <input type="radio"/> |
| F.3  | Showering                                                                                                                                                                                                                                                                                                                                                                                                                                                                 | <input type="radio"/> |
| F.4  | Climbing a hill or a flight of stairs without stopping                                                                                                                                                                                                                                                                                                                                                                                                                    | <input type="radio"/> |
| F.5  | Gardening, vacuuming or carrying groceries                                                                                                                                                                                                                                                                                                                                                                                                                                | <input type="radio"/> |
| F.6  | Walking more than a block at a brisk pace                                                                                                                                                                                                                                                                                                                                                                                                                                 | <input type="radio"/> |
| F.7  | Running or jogging                                                                                                                                                                                                                                                                                                                                                                                                                                                        | <input type="radio"/> |
| F.8  | Lifting or moving heavy objects (e.g. furniture, children)                                                                                                                                                                                                                                                                                                                                                                                                                | <input type="radio"/> |
| F.9  | Participating in strenuous sports (e.g. swimming, tennis)                                                                                                                                                                                                                                                                                                                                                                                                                 | <input type="radio"/> |
| F.10 | <p>Compared with 4 weeks ago, how often do you have chest pain ,chest tightness or angina when doing your most strenuous activities?</p> <p><input type="radio"/> Much more often   <input type="radio"/> Slightly more often   <input type="radio"/> About the same   <input type="radio"/> Slightly less often   <input type="radio"/> Much less often   <input type="radio"/> None over the past 4 weeks   <input type="radio"/> Refuse to answer or unknown</p>       |                       |                       |                       |                       |                       |                       |                       |
| F.11 | <p>Over the past 4 weeks, on average, how many times have you had chest pain, chest tightness or angina?</p> <p><input type="radio"/> ≥4 or more times per day<br/> <input type="radio"/> 1-3 times per day<br/> <input type="radio"/> 3-6 times per week<br/> <input type="radio"/> 1-2 times per week<br/> <input type="radio"/> Less than once a week<br/> <input type="radio"/> None over the past 4 weeks<br/> <input type="radio"/> Refuse to answer or unknown</p> |                       |                       |                       |                       |                       |                       |                       |
| F.12 | <p>Over the past 4 weeks, on average, how many times have you had to take nitroglycerin?</p> <p><input type="radio"/> ≥4 or more times per day<br/> <input type="radio"/> 1-3 times per day<br/> <input type="radio"/> 3-6 times per week<br/> <input type="radio"/> 1-2 times per week</p>                                                                                                                                                                               |                       |                       |                       |                       |                       |                       |                       |

|      |                                                                                                                                                                                                                                                                                                                                                                                                             |
|------|-------------------------------------------------------------------------------------------------------------------------------------------------------------------------------------------------------------------------------------------------------------------------------------------------------------------------------------------------------------------------------------------------------------|
|      | <ul style="list-style-type: none"> <li>○ Less than once a week</li> <li>○ None over the past 4 weeks</li> <li>○ Refuse to answer or unknown</li> </ul>                                                                                                                                                                                                                                                      |
| F.13 | <p>How bothersome is it for you to take pills for chest pain, chest tightness or angina as prescribed?</p> <ul style="list-style-type: none"> <li>○ Extremely bothersome</li> <li>○ Quite a bit bothersome</li> <li>○ Moderately bothersome</li> <li>○ Slightly bothersome</li> <li>○ Not bothersome at all</li> <li>○ My doctor has not prescribed pills</li> <li>○ Refuse to answer or unknown</li> </ul> |
| F.14 | <p>How satisfied are you that everything possible is being done to treat your chest pain, chest tightness or angina?</p> <ul style="list-style-type: none"> <li>○ Not satisfied at all</li> <li>○ Mostly dissatisfied</li> <li>○ Somewhat satisfied</li> <li>○ Mostly satisfied</li> <li>○ Completely satisfied</li> <li>○ Refuse to answer or unknown</li> </ul>                                           |
| F.15 | <p>How satisfied are you with explanations your doctor has given about your chest pain, chest tightness or angina?</p> <ul style="list-style-type: none"> <li>○ Not satisfied at all</li> <li>○ Mostly dissatisfied</li> <li>○ Somewhat satisfied</li> <li>○ Mostly satisfied</li> <li>○ Completely satisfied</li> <li>○ Refuse to answer or unknown</li> </ul>                                             |
| F.16 | <p>Overall, how satisfied are you with the current treatment of your chest pain, chest tightness or angina?</p> <ul style="list-style-type: none"> <li>○ Not satisfied at all</li> <li>○ Mostly dissatisfied</li> <li>○ Somewhat satisfied</li> <li>○ Mostly satisfied</li> <li>○ Completely satisfied</li> <li>○ Refuse to answer or unknown</li> </ul>                                                    |
| F.17 | <p>Over the past 4 weeks, how much has your chest pain, chest tightness or angina limited your enjoyment of life?</p> <ul style="list-style-type: none"> <li>○ Extremely limited</li> <li>○ Quite a bit limited</li> <li>○ Moderately limited</li> <li>○ Slightly limited</li> <li>○ Not limited at all</li> <li>○ Refuse to answer or unknown</li> </ul>                                                   |
| F.18 | <p>If you had to spend the rest of your life with your chest pain, chest tightness or angina the way it is right now, how would you feel about this?</p>                                                                                                                                                                                                                                                    |

- Not satisfied at all
- Mostly dissatisfied
- Somewhat satisfied
- Mostly satisfied
- Completely satisfied
- Refuse to answer or unknown

F.19 How often do you think or worry that you may have a heart attack or die suddenly?

- I can't stop thinking or worrying about it
- I often think or worry about it
- I occasionally think or worry about it
- I rarely think or worry about it
- I never think or worry about it
- Refuse to answer or unknown

#### G. HEALTH-RELATED QUALITY OF LIFE (EQ-5D)

The following questions ask about your current health state. In each of the following categories, please indicate which statement best describes your own health state today.

G.1 Mobility

- I have **no** problems in walking about.
- I have **some** problems in walking about.
- I am **confined to bed**.
- Refuse to answer or unknown

G.2 Self-care

- I have **no** problems with self-care.
- I have **some** problems washing or dressing myself.
- I am **unable to wash or dress myself**.
- Refuse to answer or unknown

G.3 Usual activities (e.g., work, study, housework, family or leisure activities)

- I have **no** problems with performing my usual activities.
- I have **some** problems with performing my usual activities.
- I am **unable to perform my usual activities**.
- Refuse to answer or unknown

G.4 Pain/discomfort

- I have **no** pain or discomfort.
- I have **moderate** pain or discomfort.
- I have **extreme** pain or discomfort.

☐ Refuse to answer or unknown

G.5 Anxiety/depression

☐ I am **not** anxious or depressed.  
☐ I am **moderately** anxious or depressed.  
☐ I am **extremely** anxious or depressed.  
☐ Refuse to answer or unknown

G.6 Please **score** how good or bad your own health is today. The best state you can imagine is 100 and the worst health state you can imagine is 0. Overall, how would you score your own health today between 0 and 100?  
 Enter value between 0 and 100: \_ \_ \_ ☐ Refuse to answer

## H. DEPRESSION

Over the last 2 weeks, how often have you been bothered by any of the following problems?

|     |                                                                                                                                                                          | Not at all            | Several days          | More than half the days | Nearly every day      | Refuse to answer or unknown |
|-----|--------------------------------------------------------------------------------------------------------------------------------------------------------------------------|-----------------------|-----------------------|-------------------------|-----------------------|-----------------------------|
| H.1 | Little interest or pleasure in doing things                                                                                                                              | <input type="radio"/> | <input type="radio"/> | <input type="radio"/>   | <input type="radio"/> | <input type="radio"/>       |
| H.2 | Feeling down, depressed or hopeless                                                                                                                                      | <input type="radio"/> | <input type="radio"/> | <input type="radio"/>   | <input type="radio"/> | <input type="radio"/>       |
| H.3 | Trouble falling or staying asleep, or sleeping too much                                                                                                                  | <input type="radio"/> | <input type="radio"/> | <input type="radio"/>   | <input type="radio"/> | <input type="radio"/>       |
| H.4 | Feeling tired or having little energy                                                                                                                                    | <input type="radio"/> | <input type="radio"/> | <input type="radio"/>   | <input type="radio"/> | <input type="radio"/>       |
| H.5 | Poor appetite or overeating                                                                                                                                              | <input type="radio"/> | <input type="radio"/> | <input type="radio"/>   | <input type="radio"/> | <input type="radio"/>       |
| H.6 | Feeling bad about yourself, or that you are a failure or have let yourself or your family down                                                                           | <input type="radio"/> | <input type="radio"/> | <input type="radio"/>   | <input type="radio"/> | <input type="radio"/>       |
| H.7 | Trouble concentrating on things, such as reading the newspaper or watching television                                                                                    | <input type="radio"/> | <input type="radio"/> | <input type="radio"/>   | <input type="radio"/> | <input type="radio"/>       |
| H.8 | Moving or speaking so slowly that other people could have noticed. Or the opposite – being so fidgety or restless that you have been moving around a lot more than usual | <input type="radio"/> | <input type="radio"/> | <input type="radio"/>   | <input type="radio"/> | <input type="radio"/>       |

## I. SOCIOECONOMIC CHARACTER

- I.1 Your current job status:  
☐ currently having a job ☐ used to have a job ☐ never have a job ☐ Unknown ☐ Refuse to answer
- I.2 **[If currently working]** What is/was your primary occupation in the past year:  
☐ Farmer  
☐ Worker  
☐ Police/Administrative  
☐ Clerical  
☐ Medical related professional  
☐ Non-medical related professional  
☐ Business  
☐ Self-employed  
☐ Military  
☐ Others  
☐ Refuse to answer
- I.3 **[If currently working]** How often do you have to work through the night as a shift worker on average in the past year?  
☐ 1 or more times/week ☐ 1-3 times/month ☐ Less than once/month ☐ Never ☐ Unknown ☐ Refuse to answer
- I.4 **[If used to work or never work]** What is the primary reason for not working currently:  
☐ Unemployed/laid-off  
☐ Full-time homemaker  
☐ Retired  
☐ Unable to work  
☐ Prefer not to work  
☐ Others, please specify:  
☐ Unknown  
☐ Refuse to answer
- I.5 **[If used to work]** Have you stopped working since your heart attack or heart problem?  
☐ Yes ☐ No ☐ Unknown ☐ Refuse to answer
- I.6 Current marital status:  
☐ Married ☐ Divorced /Separated ☐ Widowed ☐ Single ☐ Unknown ☐ Refuse to answer
- I.7 Including you, there are currently \_\_ people living together in your family (sharing the household income in the last year) ☐ Refuse to answer
- I.8 What was your total household income in the last year?  
☐ < ¥10000 ☐ ¥10000 - 29999 ☐ ¥ 30000 - 49999 ☐ ¥50000 - 69999 ☐ ¥70000 - 99999 ☐ ≥ ¥100000 ☐ Unknown ☐ Refuse to answer

|                                                                                                                                                                                                                                                                                                                                                                                                                                                                                                                                                                                                                                                            |                                                                                                                                                                                                                                                 |                       |                       |                       |                       |                       |                             |
|------------------------------------------------------------------------------------------------------------------------------------------------------------------------------------------------------------------------------------------------------------------------------------------------------------------------------------------------------------------------------------------------------------------------------------------------------------------------------------------------------------------------------------------------------------------------------------------------------------------------------------------------------------|-------------------------------------------------------------------------------------------------------------------------------------------------------------------------------------------------------------------------------------------------|-----------------------|-----------------------|-----------------------|-----------------------|-----------------------|-----------------------------|
| <b>J. RISK FACTORS</b>                                                                                                                                                                                                                                                                                                                                                                                                                                                                                                                                                                                                                                     |                                                                                                                                                                                                                                                 |                       |                       |                       |                       |                       |                             |
| J.1                                                                                                                                                                                                                                                                                                                                                                                                                                                                                                                                                                                                                                                        | Have you ever smoked in the past 1 month?<br><input type="radio"/> Never <b>[go to J3]</b> <input type="radio"/> Yes <b>[go to J3]</b> <input type="radio"/> Unknown <b>[go to J3]</b> <input type="radio"/> Refuse to answer <b>[go to J3]</b> |                       |                       |                       |                       |                       |                             |
| J.2                                                                                                                                                                                                                                                                                                                                                                                                                                                                                                                                                                                                                                                        | <b>[If smoked in the past 30 days]</b> On average you smoke __ _ cigarettes per day in the last month. <input type="radio"/> Unknown <input type="radio"/> Refuse to answer                                                                     |                       |                       |                       |                       |                       |                             |
| <b>K. STRESS</b>                                                                                                                                                                                                                                                                                                                                                                                                                                                                                                                                                                                                                                           |                                                                                                                                                                                                                                                 |                       |                       |                       |                       |                       |                             |
| <p>The questions in this scale ask about your thoughts and feelings during the last month. In each case, you will be asked to indicate how often you felt or thought a certain way. Although some of the questions are similar, there are differences between them and you should treat each one as a separate question. The best approach is to answer each question fairly quickly. That is, don't try to count up the number of times you felt a particular way, but rather indicate the alternative that seems most reasonable. For each question choose the following alternatives: never, almost never, sometimes, fairly often, and very often.</p> |                                                                                                                                                                                                                                                 |                       |                       |                       |                       |                       |                             |
|                                                                                                                                                                                                                                                                                                                                                                                                                                                                                                                                                                                                                                                            |                                                                                                                                                                                                                                                 | Never                 | Almost never          | Sometimes             | Fairly often          | Very often            | Refuse to answer or unknown |
| K.1                                                                                                                                                                                                                                                                                                                                                                                                                                                                                                                                                                                                                                                        | In the last month, how often have you felt that you were unable to control the important things in your life?                                                                                                                                   | <input type="radio"/>       |
| K.2                                                                                                                                                                                                                                                                                                                                                                                                                                                                                                                                                                                                                                                        | In the last month, how often have you felt confident in your ability to handle your personal problems?                                                                                                                                          | <input type="radio"/>       |
| K.3                                                                                                                                                                                                                                                                                                                                                                                                                                                                                                                                                                                                                                                        | In the last month, how often have you felt that things were going your way?                                                                                                                                                                     | <input type="radio"/>       |
| K.4                                                                                                                                                                                                                                                                                                                                                                                                                                                                                                                                                                                                                                                        | In the last month, how often have you felt difficulties were piling up so high that you could not overcome them?                                                                                                                                | <input type="radio"/>       |
| <b>L. SOCIAL SUPPORT</b>                                                                                                                                                                                                                                                                                                                                                                                                                                                                                                                                                                                                                                   |                                                                                                                                                                                                                                                 |                       |                       |                       |                       |                       |                             |
| The following questions ask about other people who provide you with assistance and support.                                                                                                                                                                                                                                                                                                                                                                                                                                                                                                                                                                |                                                                                                                                                                                                                                                 |                       |                       |                       |                       |                       |                             |
|                                                                                                                                                                                                                                                                                                                                                                                                                                                                                                                                                                                                                                                            |                                                                                                                                                                                                                                                 | None of the time      | A little of the time  | Some of the time      | Most of the time      | All of the time       | Refuse to answer or unknown |

|                     |                                                                                                                            |                       |                       |                       |                       |                       |                       |
|---------------------|----------------------------------------------------------------------------------------------------------------------------|-----------------------|-----------------------|-----------------------|-----------------------|-----------------------|-----------------------|
| L.1                 | Is there someone available to you whom you can count on to listen to you when you need to talk?                            | <input type="radio"/> |
| L.2                 | Is there someone available to you to give you good advice about a problem?                                                 | <input type="radio"/> |
| L.3                 | Is there someone available to you who shows You love and affection?                                                        | <input type="radio"/> |
| L.4                 | Is there someone available to you to help you with daily chores?                                                           | <input type="radio"/> |
| L.5                 | Can you count on anyone to provide you with emotional support (talking over problems or helping make difficult decisions)? | <input type="radio"/> |
| L.6                 | Do you have as much contact as you would like with someone you feel close to, someone in whom you can trust and confide?   | <input type="radio"/> |
| <b>O. LAB TESTS</b> |                                                                                                                            |                       |                       |                       |                       |                       |                       |
| O.1                 | TC: ____ <input type="radio"/> Unmeasured                                                                                  |                       |                       |                       |                       |                       |                       |
| O.2                 | HDL-C: ____ <input type="radio"/> Unmeasured                                                                               |                       |                       |                       |                       |                       |                       |
| O.3                 | LDL-C: ____ <input type="radio"/> Unmeasured                                                                               |                       |                       |                       |                       |                       |                       |
| O.4                 | Blood glucose: ____ <input type="radio"/> Unmeasured                                                                       |                       |                       |                       |                       |                       |                       |
| O.5                 | ALT: ____ <input type="radio"/> Unmeasured                                                                                 |                       |                       |                       |                       |                       |                       |
| O.6                 | Cr: ____ <input type="radio"/> Unmeasured                                                                                  |                       |                       |                       |                       |                       |                       |
| O.7                 | BUN: ____ <input type="radio"/> Unmeasured                                                                                 |                       |                       |                       |                       |                       |                       |
| O.8                 | CK: ____ <input type="radio"/> Unmeasured                                                                                  |                       |                       |                       |                       |                       |                       |
| O.9                 | hsCRP: ____ <input type="radio"/> Unmeasured                                                                               |                       |                       |                       |                       |                       |                       |



- O.10 Hb: \_\_\_\_ ☐ Unmeasured
- O.11 HCT: \_\_\_\_ ☐ Unmeasured
- O.12 WBC: \_\_\_\_ ☐ Unmeasured
- O.13 PLT: \_\_\_\_ ☐ Unmeasured
- O.14 OB: \_\_\_\_ ☐ Unmeasured
- O.15 PRO: \_\_\_\_ ☐ Unmeasured

## Sample Size Calculation

The current study is primarily a descriptive one to generate information about how coronary artery disease patients are treated and what outcomes they experience. The 1-year enrollment period and estimated entire size of eligible patients (both enrolled and not enrolled) of 4000 was determined based on both feasibility and consideration of adequate statistical precision for describing the treatment decisions, guidelines adherence and appropriateness of treatment. This projected sample size was calculated to achieve 84% statistical power at a 2-sided 0.05 significance level to detect a primary endpoint difference of 4%, given the anticipated event rate of the whole cohort was 8%, at least 50% of eligible patients was enrolled into prospective cohort and the loss-to-follow up rate was less than 10%.

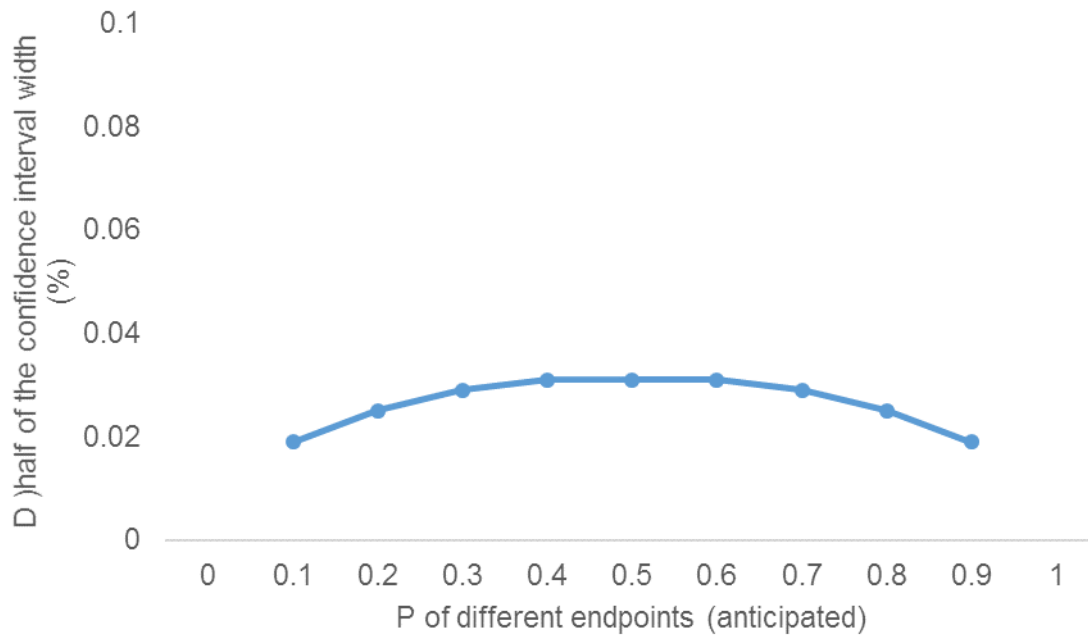

Supplement: bmjopen-2015-009743supp.pdf [file bmjopen-2015-009743supp.pdf]
